# Supplementary material for: Skipping Nonsense to Maintain Function: The Paradigm of BRCA2 Exon 12
Source: Oxford University Press journal article supplement (doi:10.1158/0008-5472.can-19-2491), 2020-02-11
Supplement: 00085472can192491-sup-227199_2_supp_6072648_q584z9.doc [file 00085472can192491-sup-227199_2_supp_6072648_q584z9.doc]

**Supplementary Data**


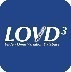


**Variant selection criteria**

**n = 133**

n = 10

n = 14

n = 15

**n = 40**

**Splicing minigene**

**assays**

+ c.6853A>G

**Exon 12**

*BRCA2*

- 100pb

+ 100pb

**Presumed LoF variants**


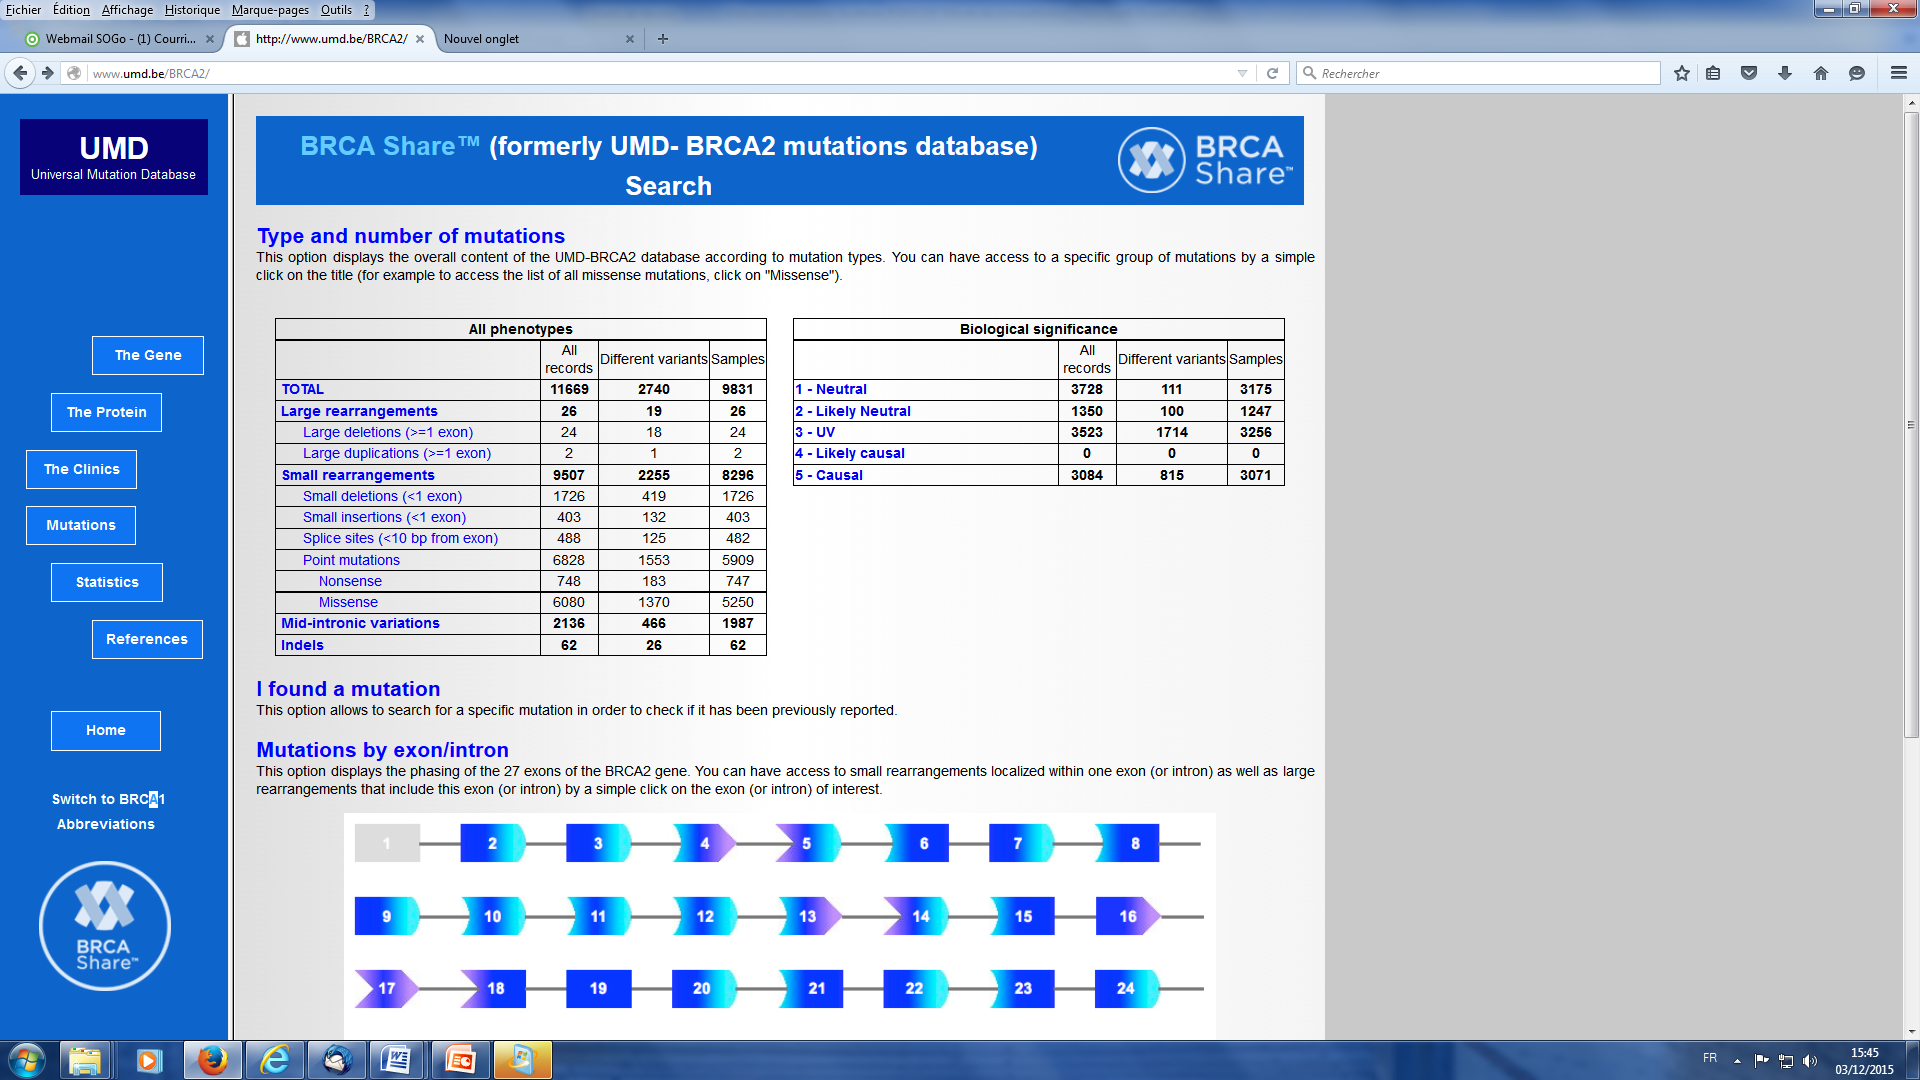


Variants predicted as spliceogenic

3’/5’ ss

ΔMES ≤ -15%

ESR

ΔtESRseq < -0.7

**BIC**


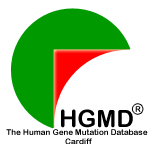

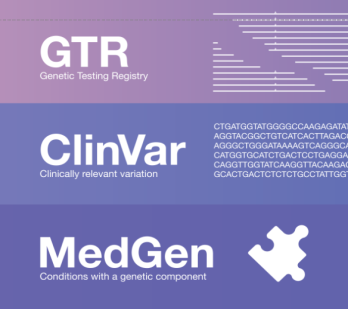

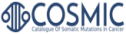

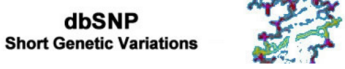


**gnomAD**

IVS±1/2

n = 4

**Nonsense**

**n = 5**

Frameshift

n = 6

**Inventory of all variants from 8 databases**

**Figure S1. Variant selection from human variation databases**

All variants located in *BRCA2* E12 and its 100 bp long flanking intronic sequences were extracted from the eight following human variation databases (last accessed: 05 September 2017): BRCA Share™, BIC (Breast Cancer Information Core), ClinVar, LOVD (Leiden Open Variation Database), HGMD (Human Gene Mutation Database), COSMIC (Catalogue of Somatic Mutations in Cancer), dbSNP (Single Nucleotide Polymorphism database) and gnomAD (genome Aggregation Database). A total of 133 variants were then collected. Firstly, all presumed LoF variants were selected, including intronic variants affecting the canonical intronic dinucleotides at 3’/5’ ss (IVS±1/2) as well as nonsense and frameshift variants. In parallel, all other variants predicted to alter either 3’/5’ ss or ESR, according respectively to the MaxEntScan algorithm (ΔMES ≤ -15%) or the ESRseq scores (ΔtESRseq < -0.7), were retained. In addition, c.6853A>G was included into the selection because it has been previously described as a *BRCA2* exon 12 spliceogenic variant (1). Altogether, this selection comprised 40 variants that were assessed for their impact on *BRCA2* exon 12 splicing in splicing minigene assays.

**Figure S2**


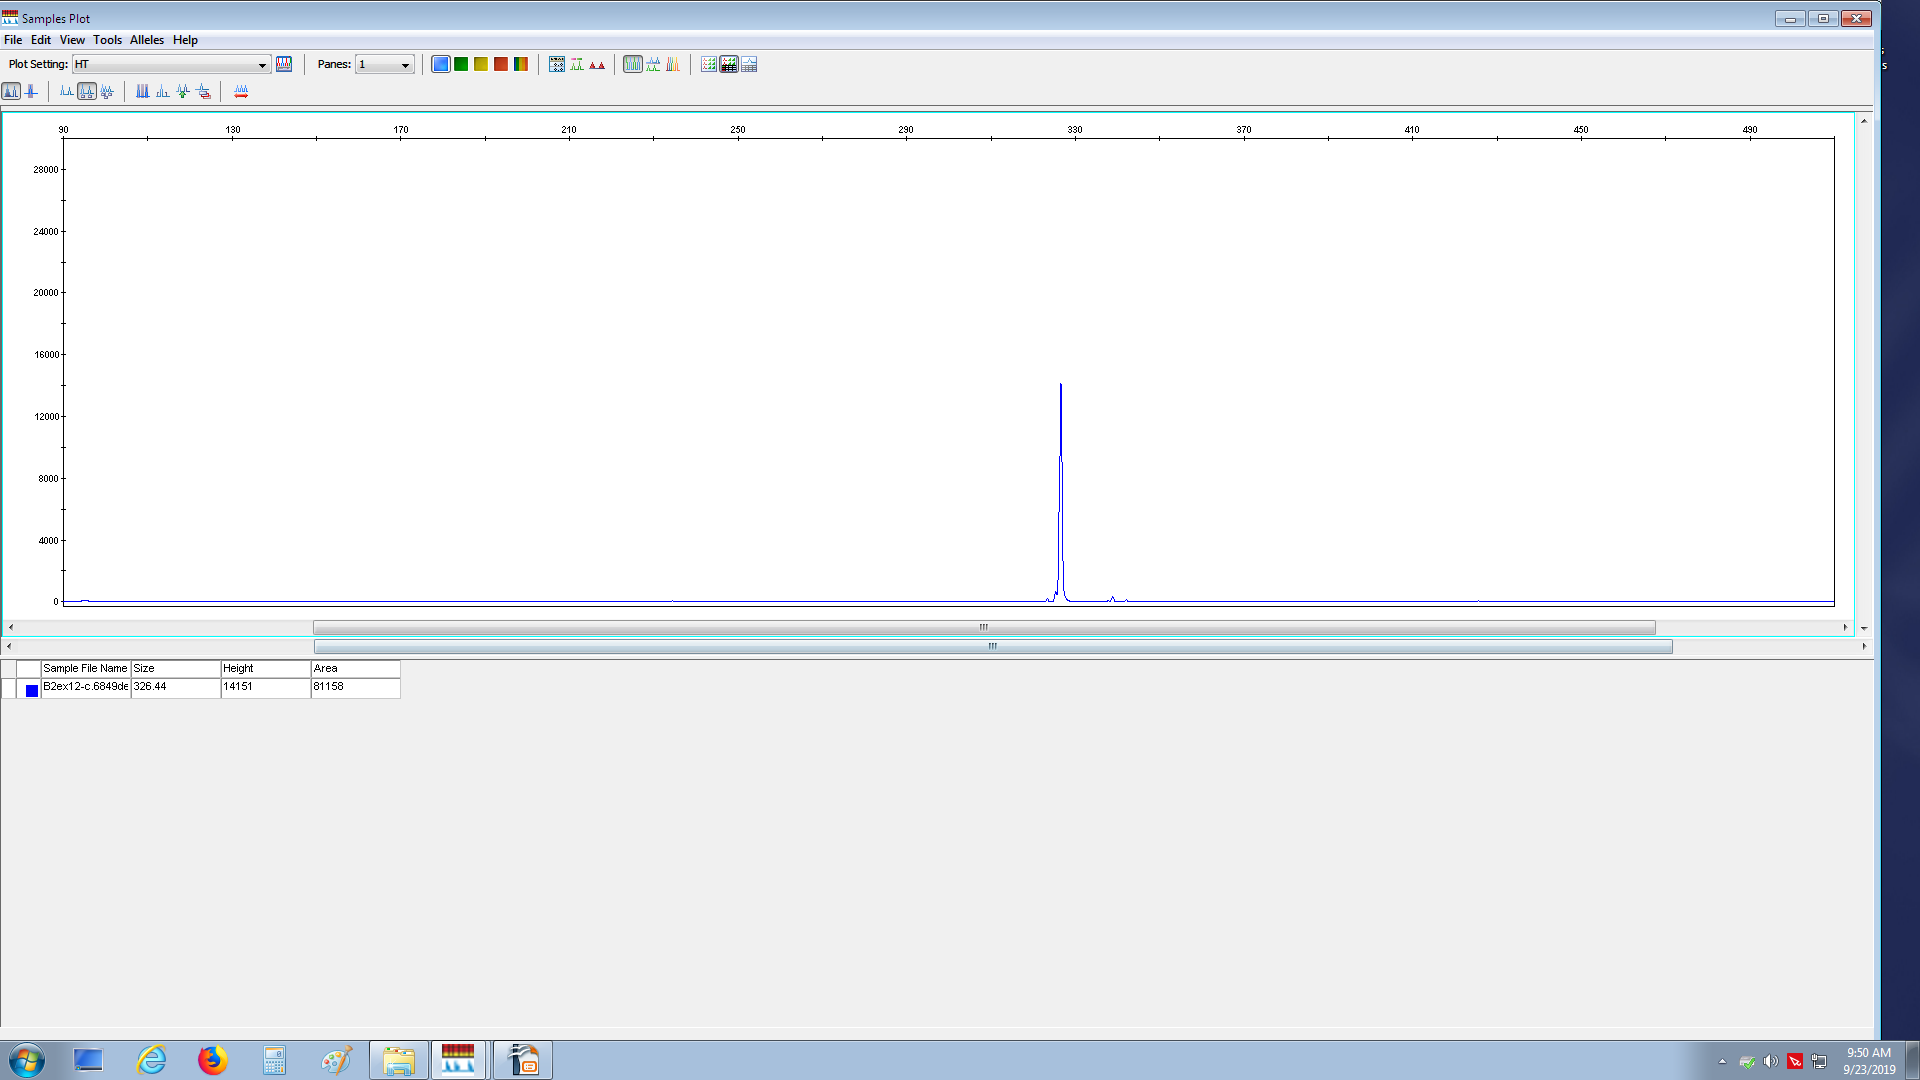

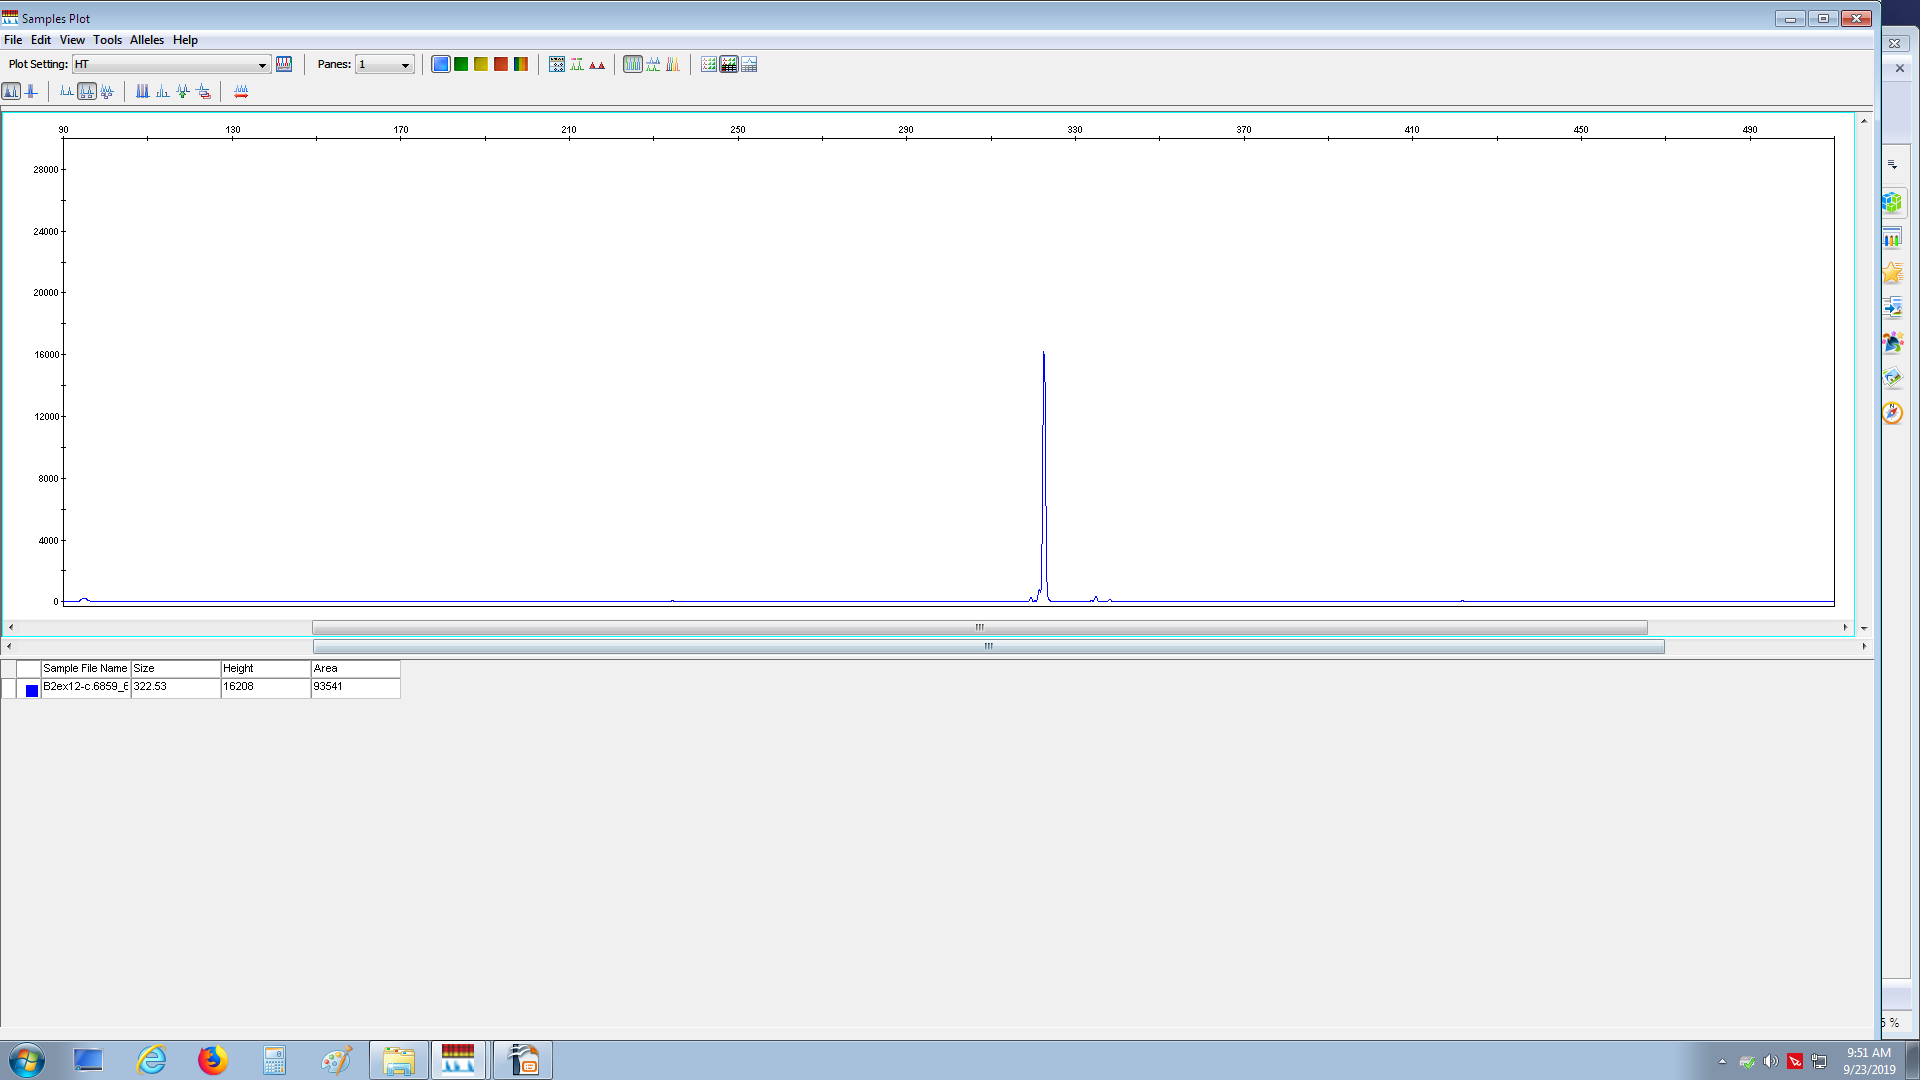

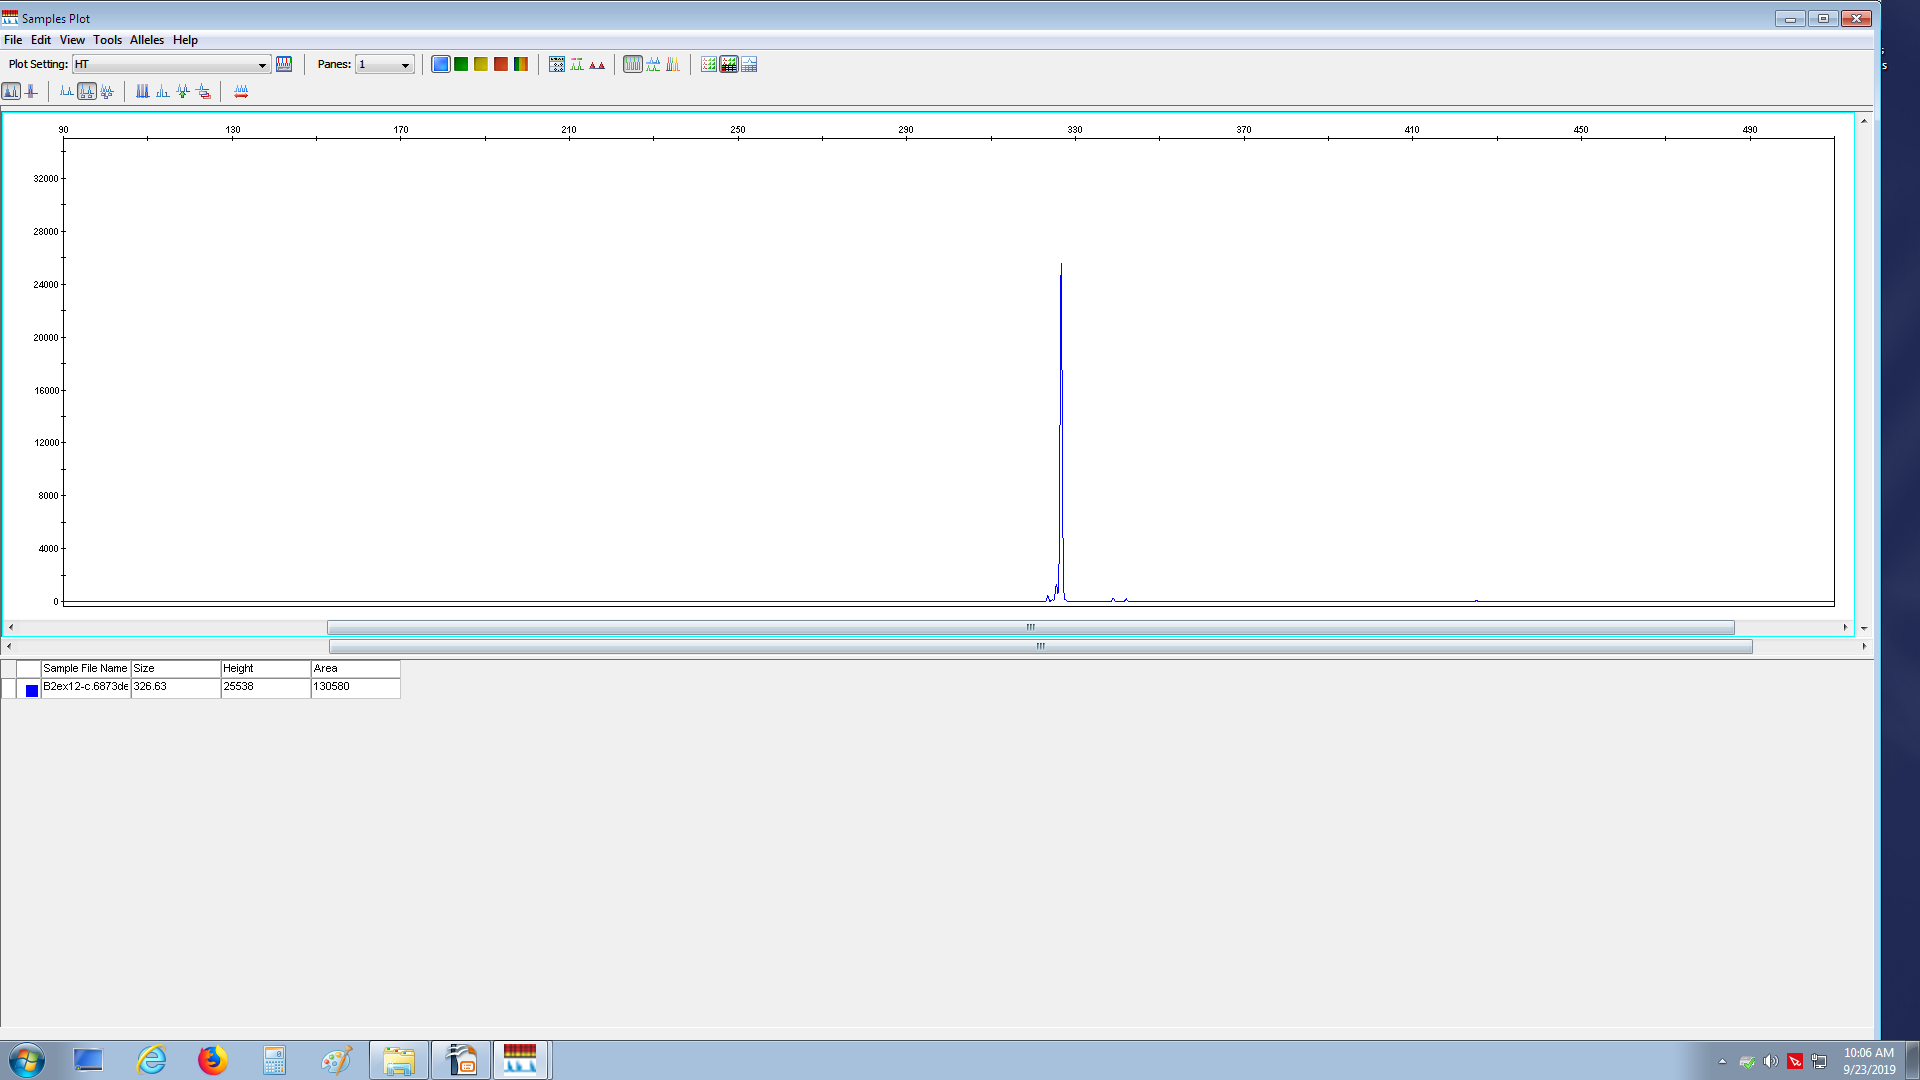

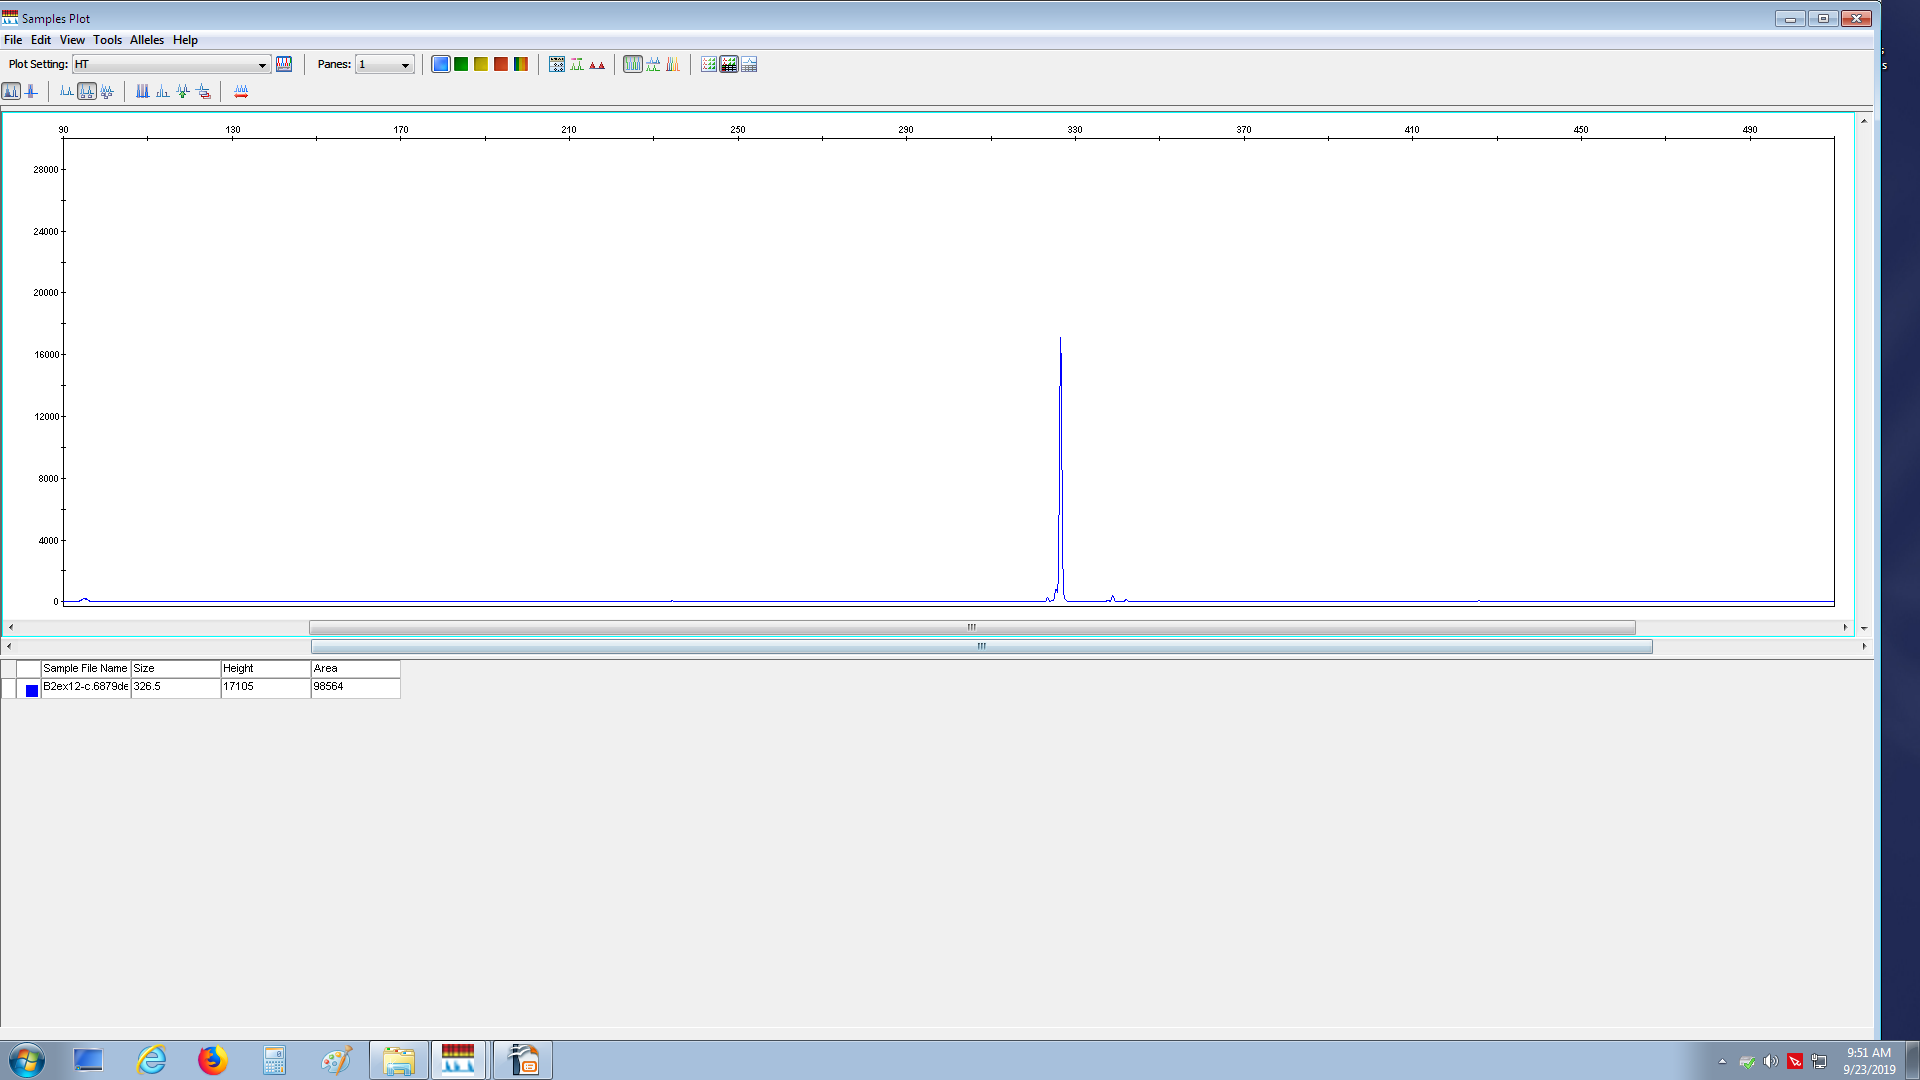

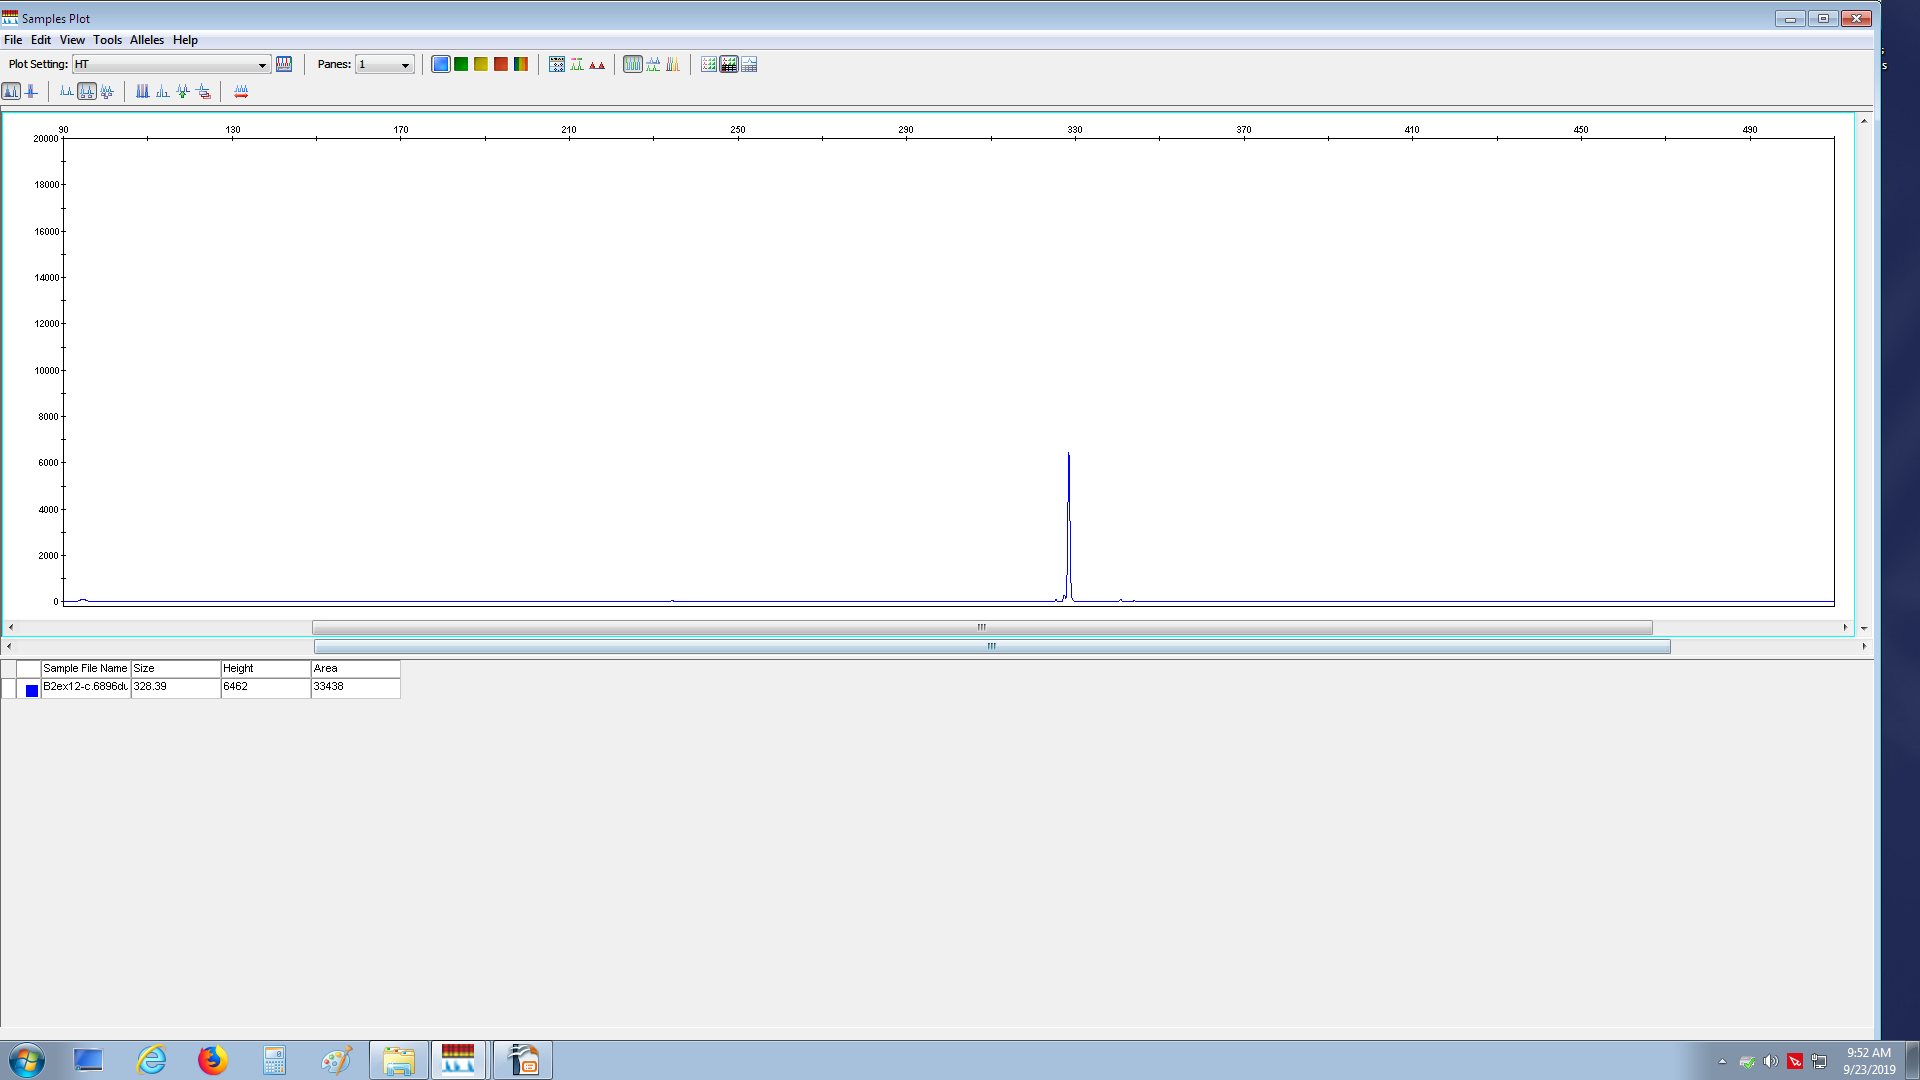

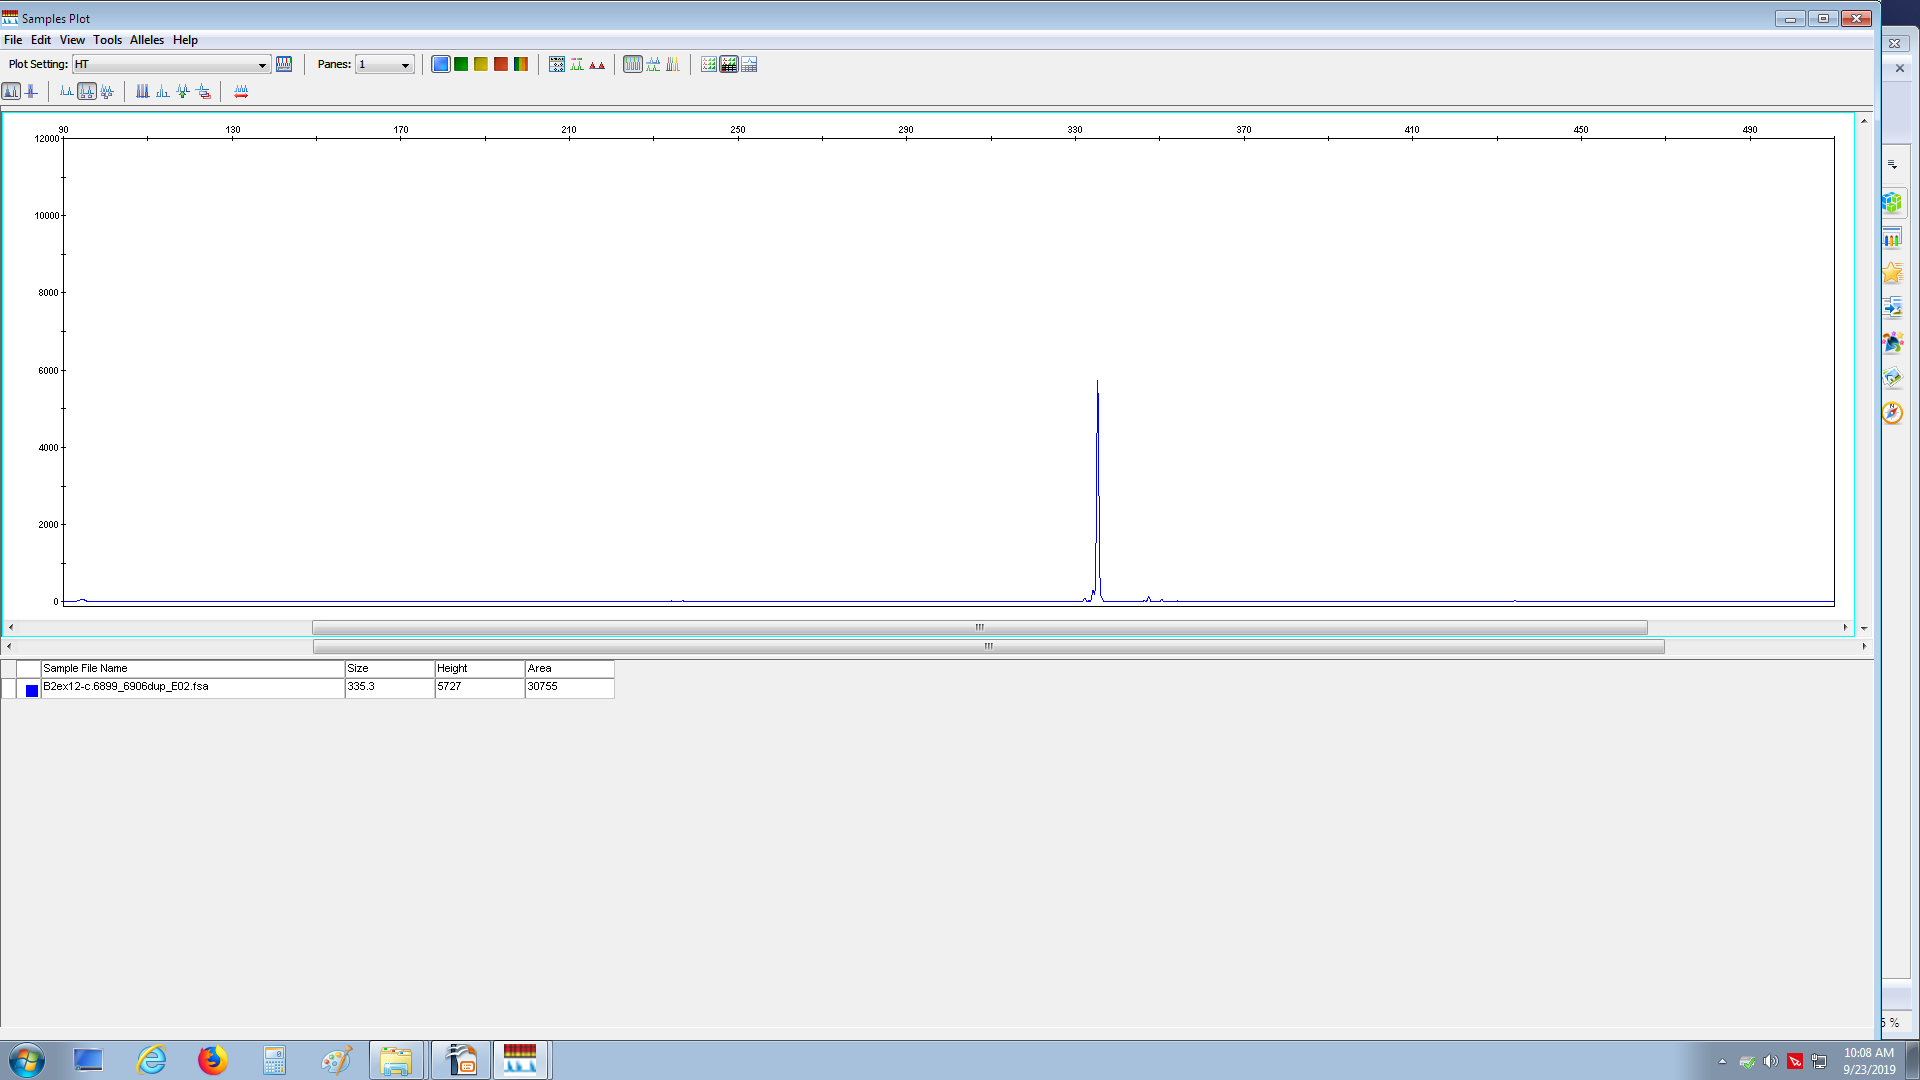

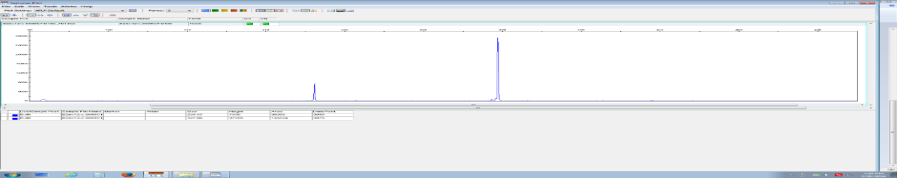

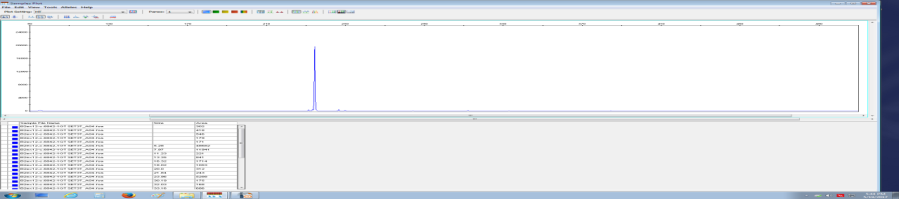

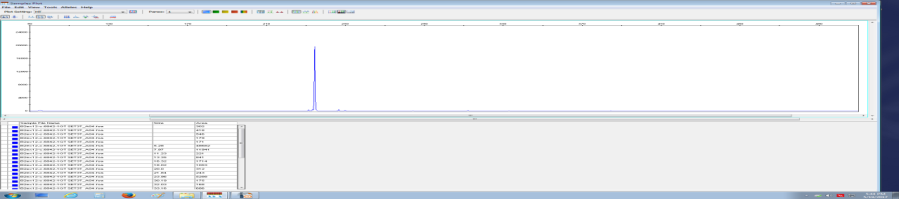

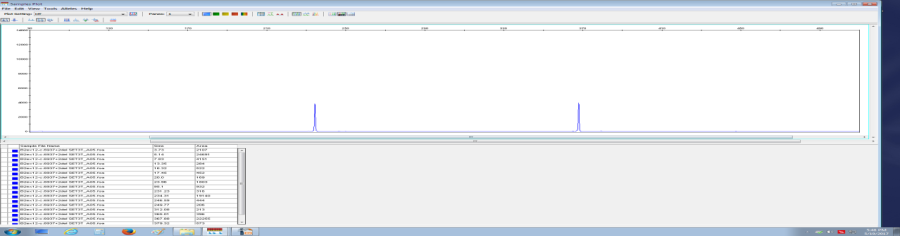

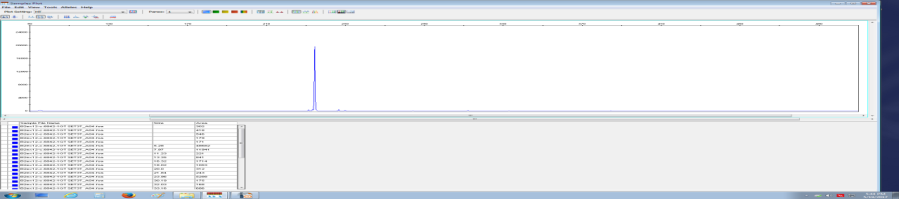


100%

49% a

51%

c.6842-1G>T

100%

c.6937+1G>A

100%

c.6937+1G>T

c.6937+2del

IVS±1/2


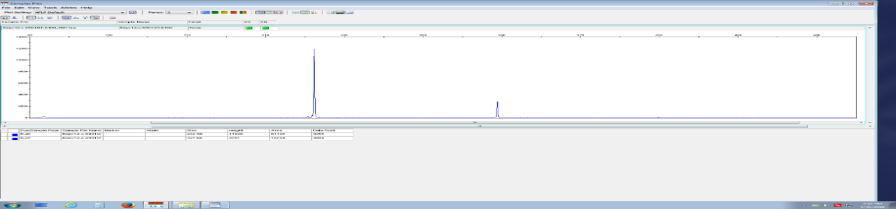


73%

27%


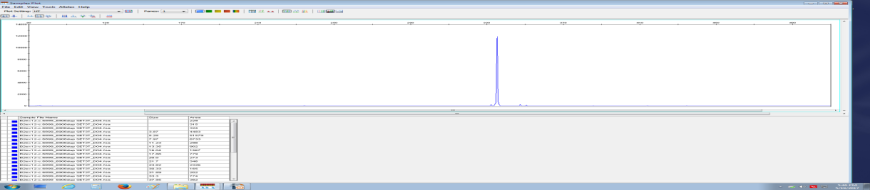


100%


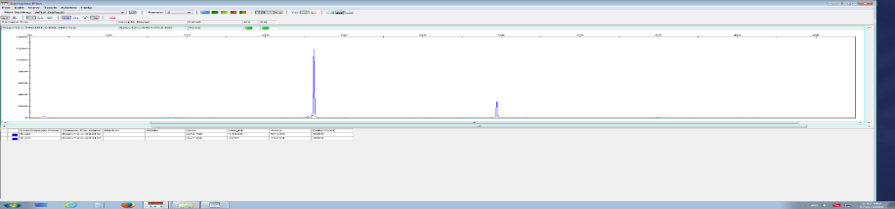

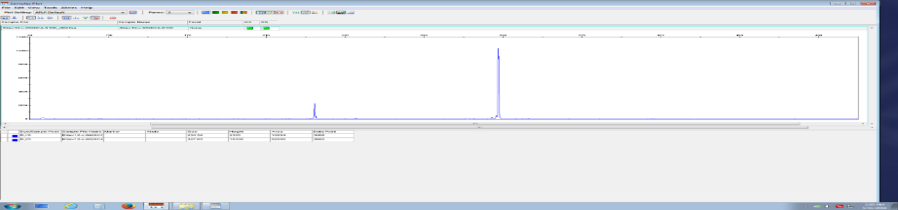


**c.6859A>T**

**c.6844G>T**

**c.6898C>T**

**c.6901G>T**

**c.6920C>A**

**Nonsense**

87%

13%

72%

28%

88%

12%

Fluorescence

100%

100%

100%

100%

100%

c.6873del

c.6849del

c.6859_6863del

c.6879del

c.6896dup

c.6899_6906dup

Frameshift

100%

Fragment size

+E12

ΔE12

+E12q(ins40)a


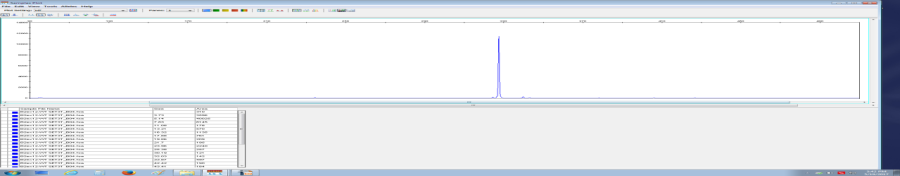


100%

WT

**Figure S2. Capillary electrophoresis analyses of *BRCA2* exon 12 splicing patterns in minigene assays of presumed LoF variants**

The *BRCA2* exon 12 splicing patterns of WT and mutant(IVS±1/2; nonsense; frameshift)minigenes expressed in HeLa cells were assessed by fluorescent RT-PCR, as described in Materials and Methods. In order to quantify the relative levels of each RNA isoform, the fluorescent RT-PCR products were resolved by capillary electrophoresis on an automated genetic analyzer. For each variant, one representative electropherogram is shown. The different fluorescence peaks correspond to transcripts either without (∆E12) or with (+E12) exon 12. An additional isoform (a) with the retention of the first 40 nucleotides of intron 12 (+E12q(ins40)) was detected in the context of c.6937+2del. Peak areas were used to quantify the relative levels of each transcript, expressed as percentage, and correspond to the average of at least three independent experiments (see Figure 1).


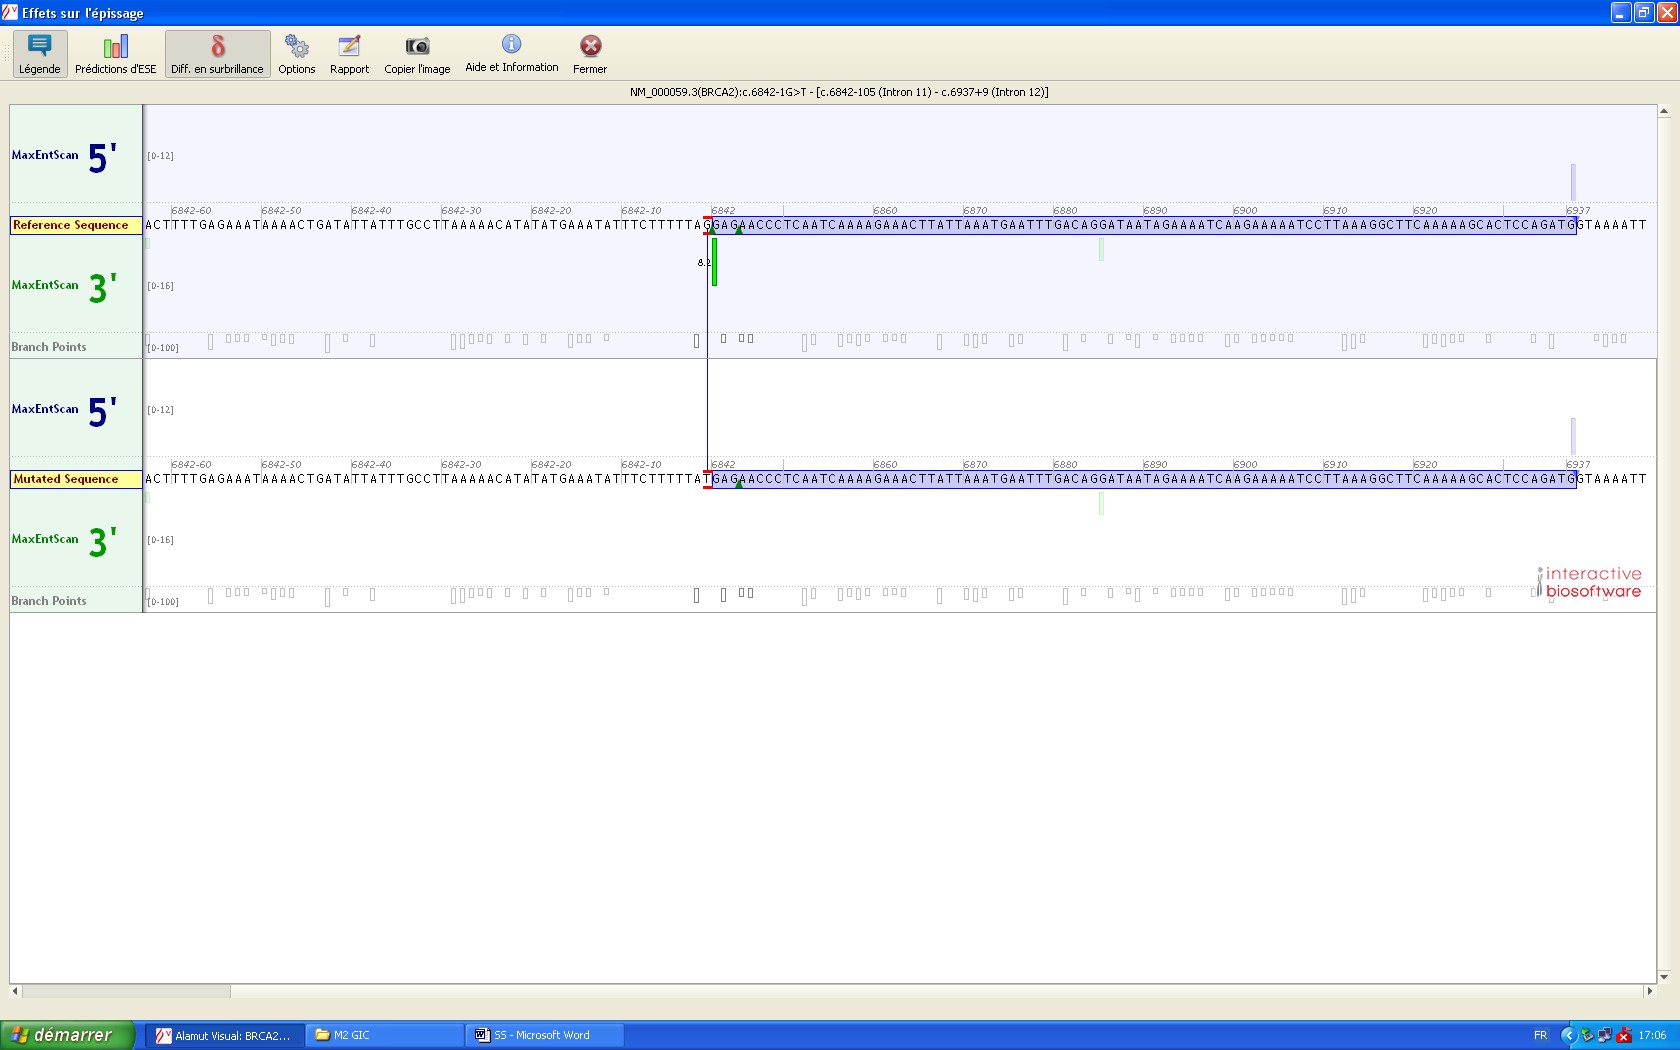


c.6842-1G>T


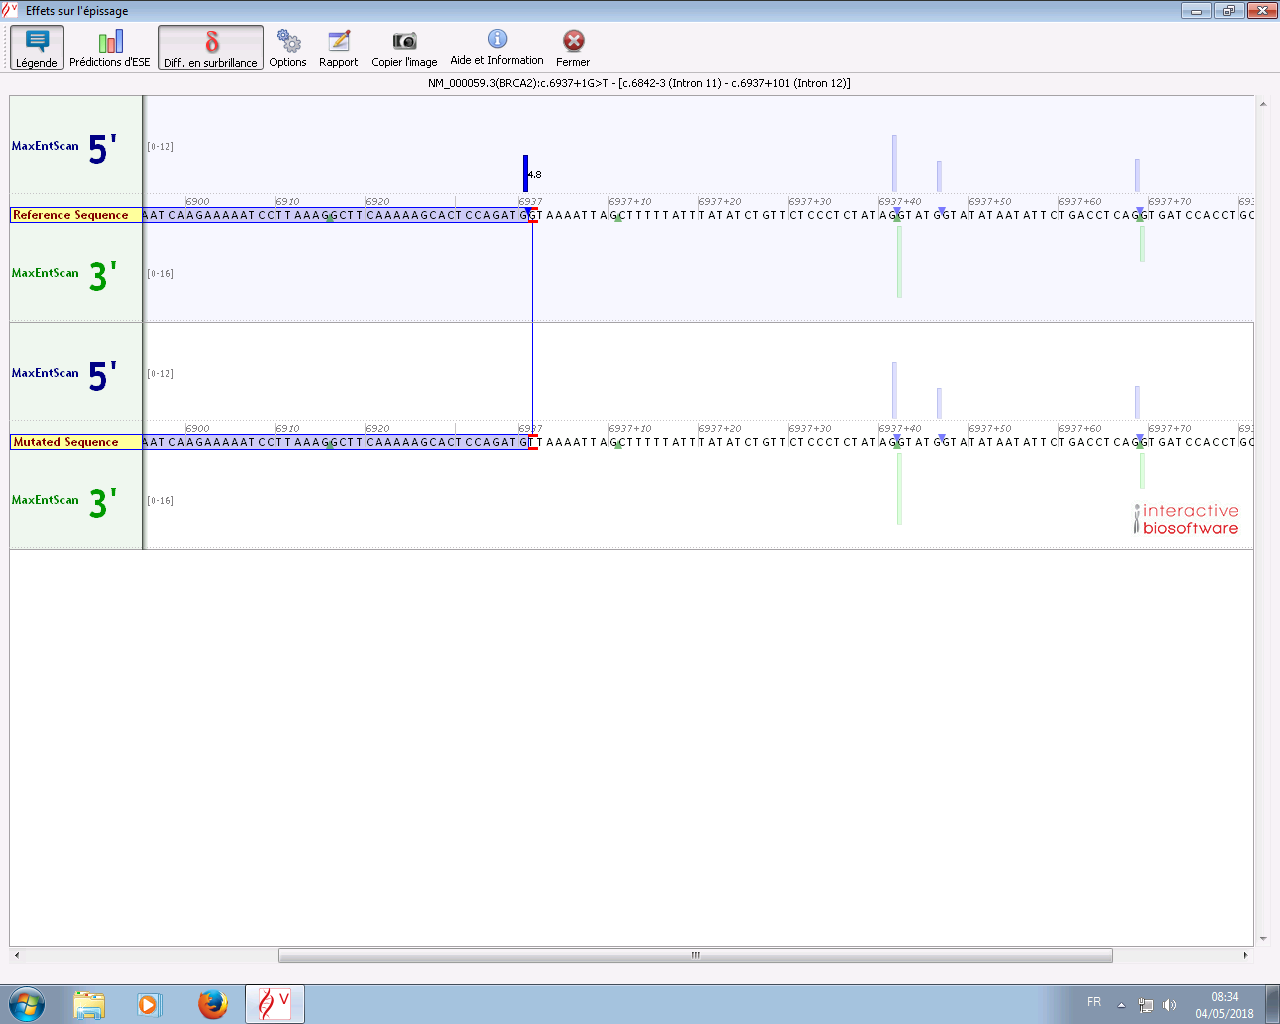

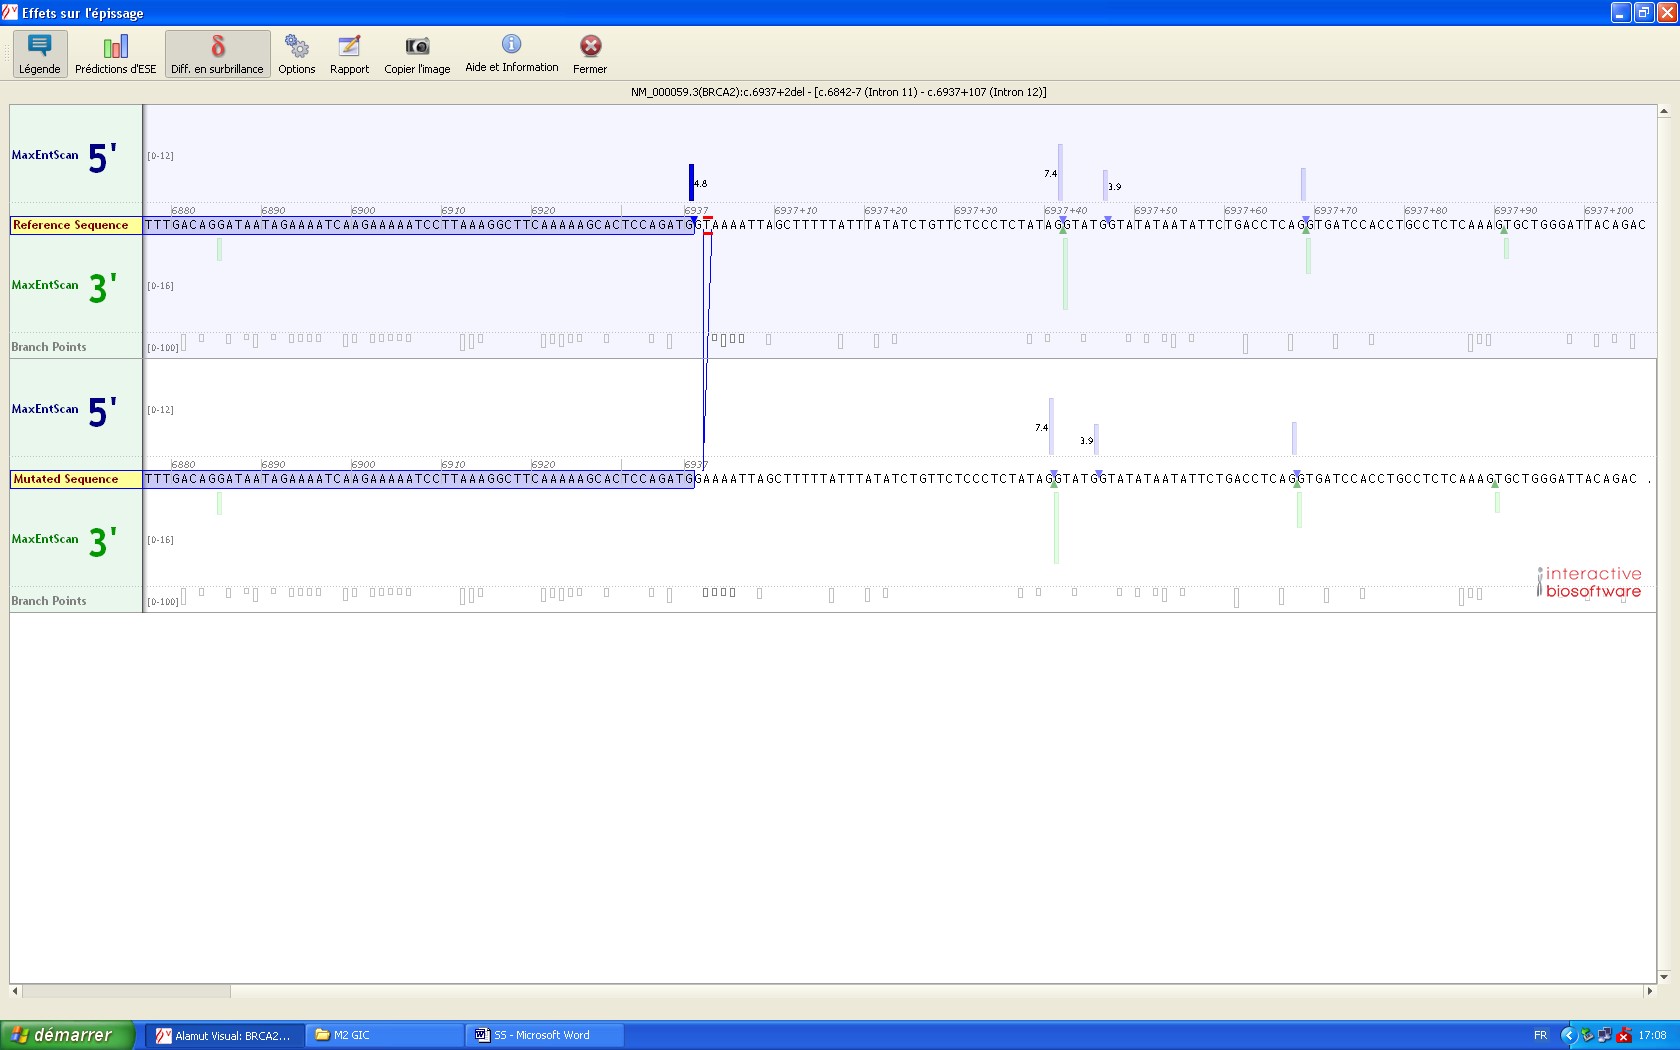

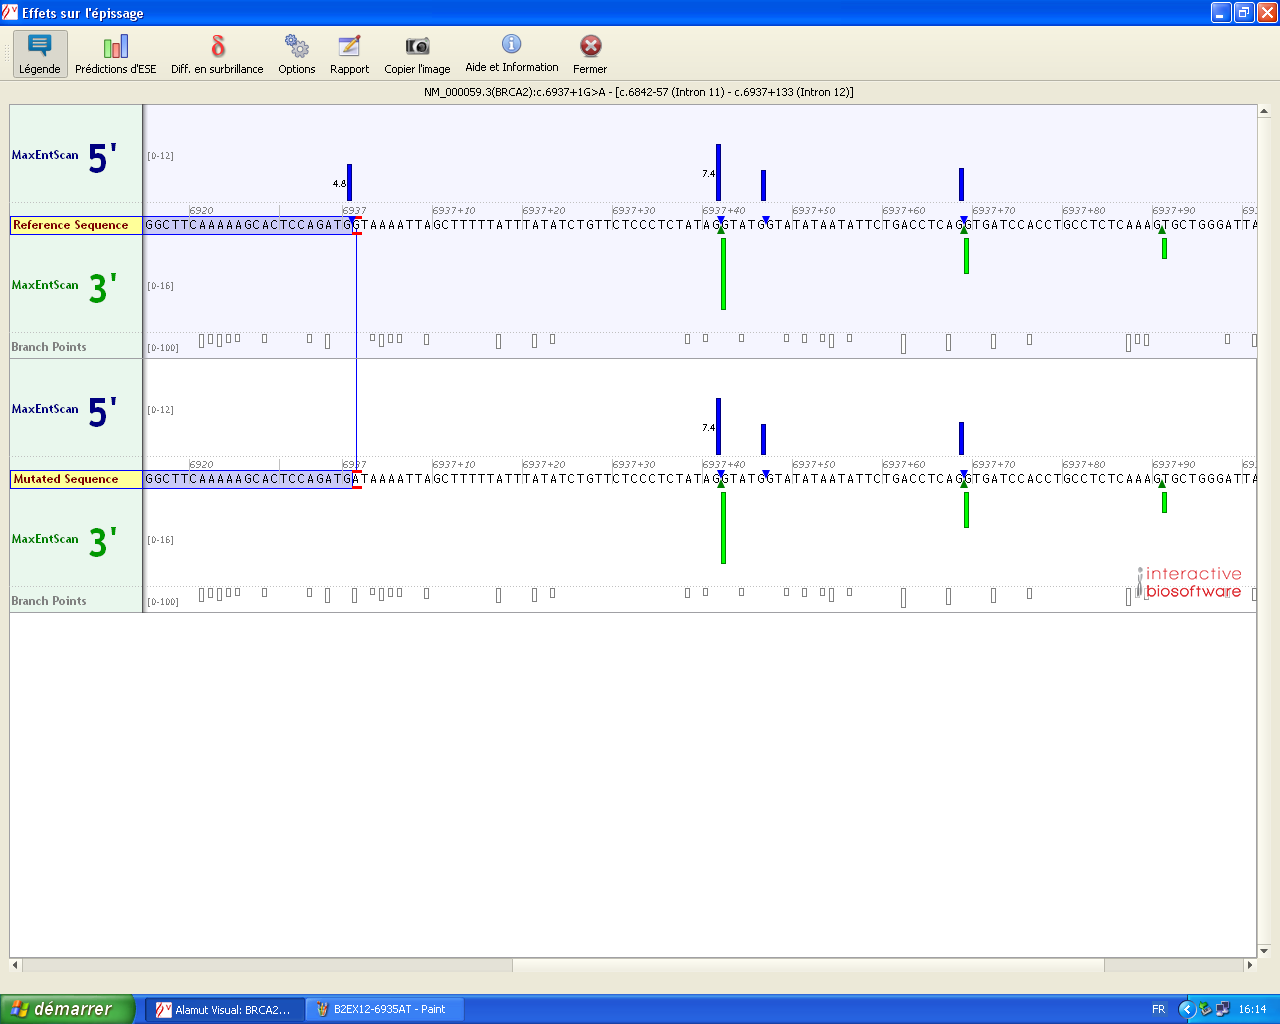

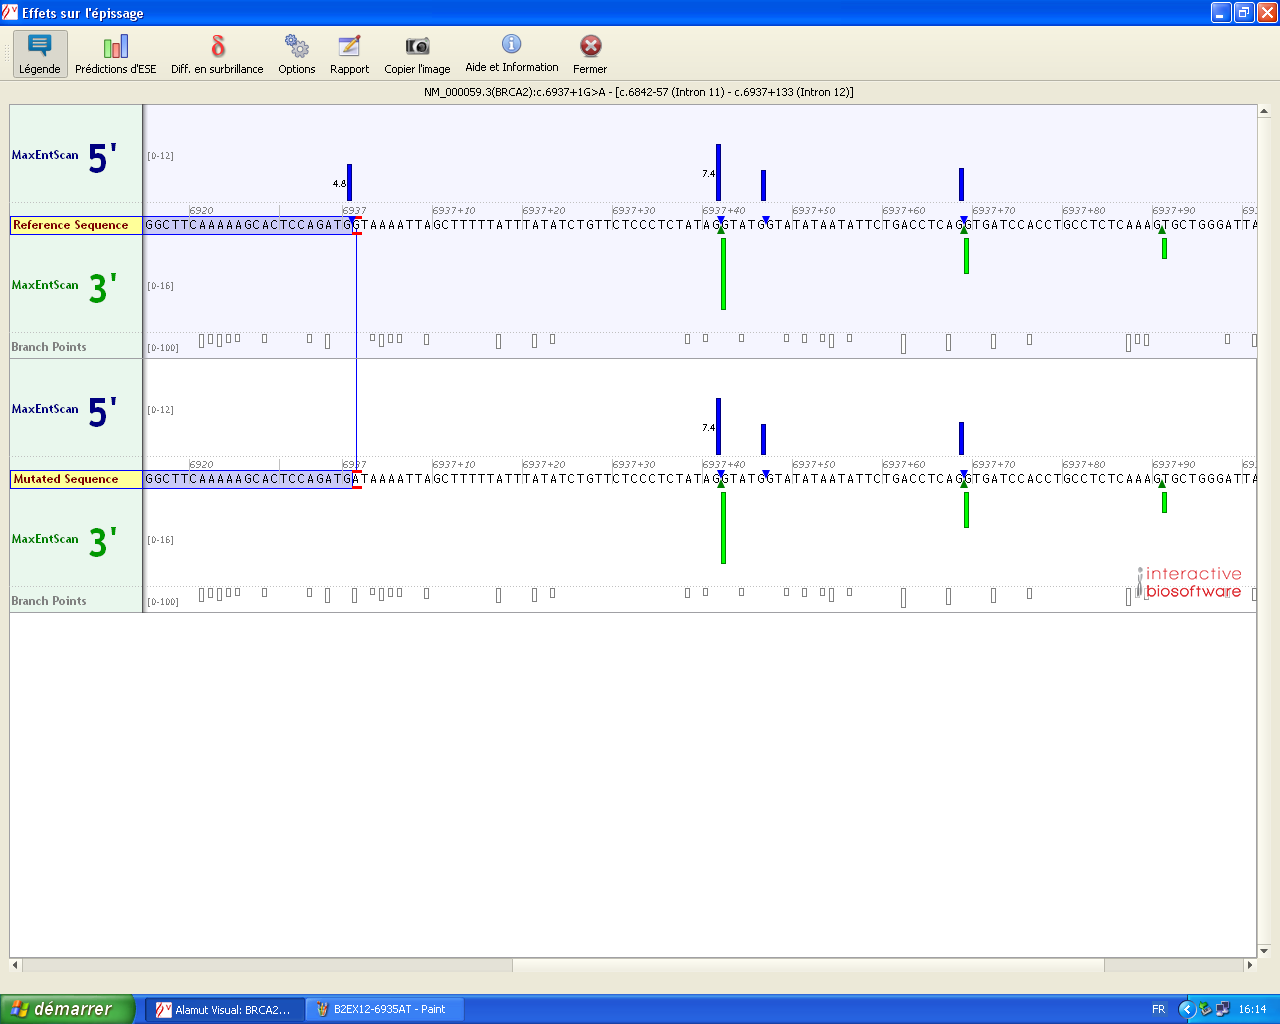

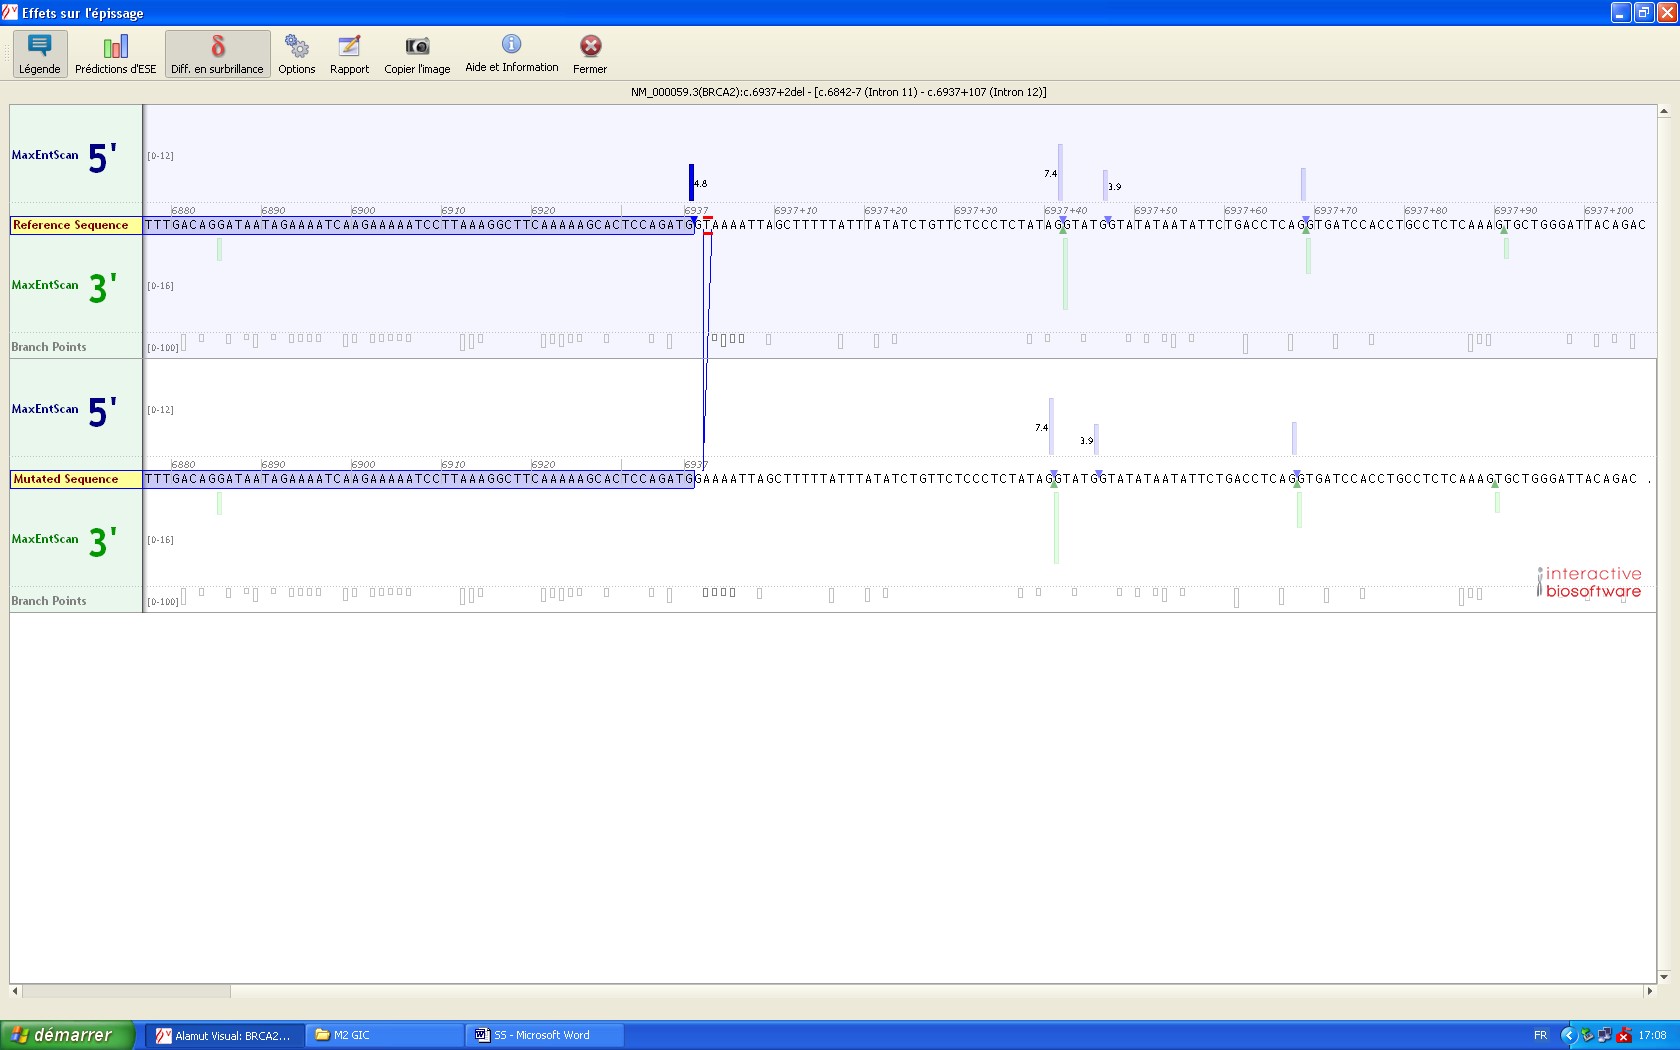


0

7.4

40 nt

c.6937+2del

7.4

7.4

Natural 5’ ss

**E12**

I12

Cryptic 5’ ss

WT

c.6937+1G>A

4.8

7.4

WT

4.8

7.4

c.6937+1G>T


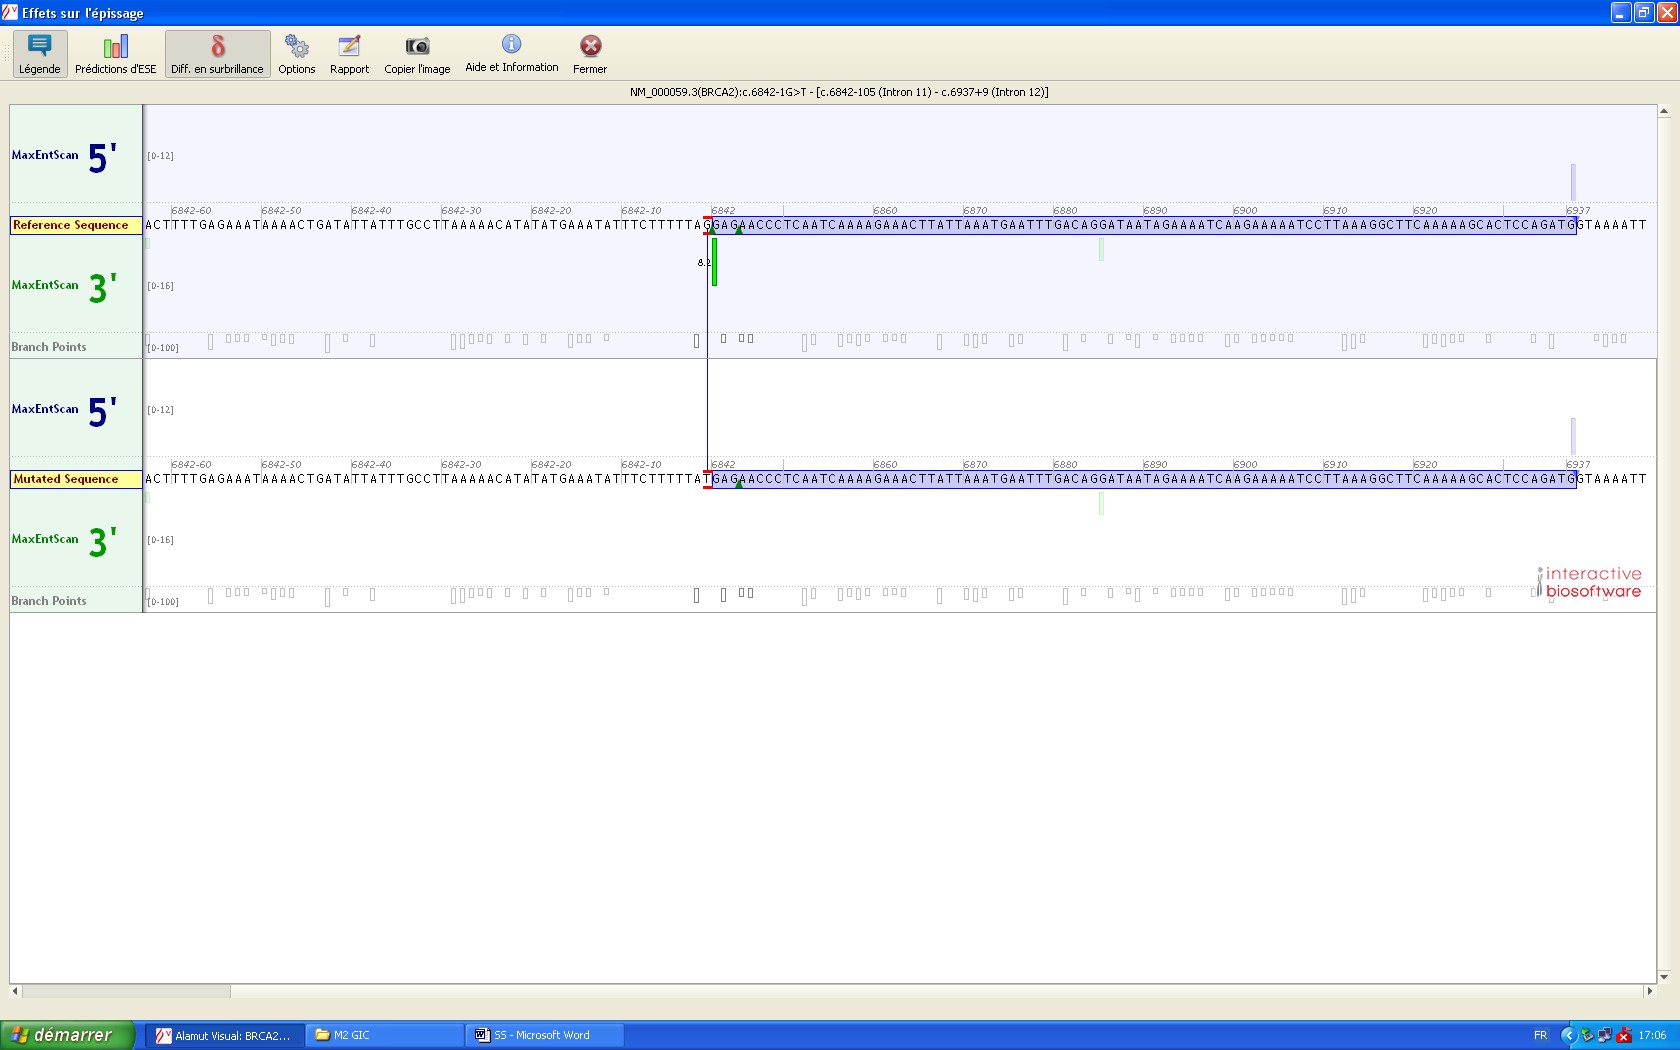


8.2

0

WT

Natural 3’ ss

**E12**

I11

0

0

**Figure S3. Bioinformatics predictions of 3’/5’ ss alterations for variants located at position IVS±1/2 of *BRCA2* exon 12**

Bioformatics predictions of the variant effects on 3’/5’ ss were based on the algorithm MaxEntScan (MES) (2), interrogated by using the integrated software Alamut Visual 2.9 (Interactive Biosoftware). The MES score of the 3’ and 5’ ss are indicated in the wild-type (WT) and variant contexts.


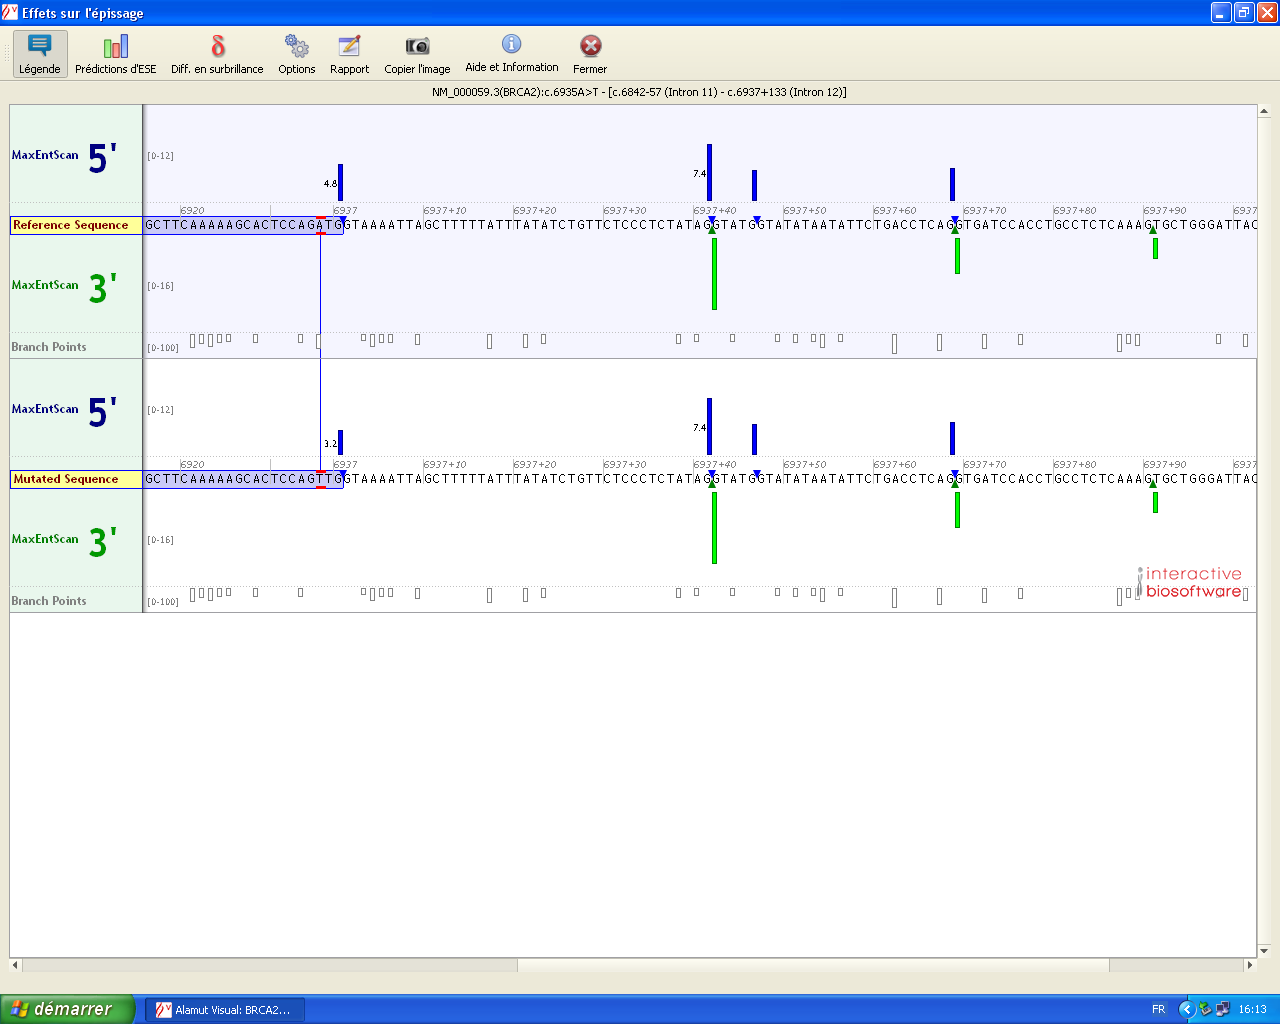


Natural

5’ ss

**E12**

I12

Cryptic

5’ ss


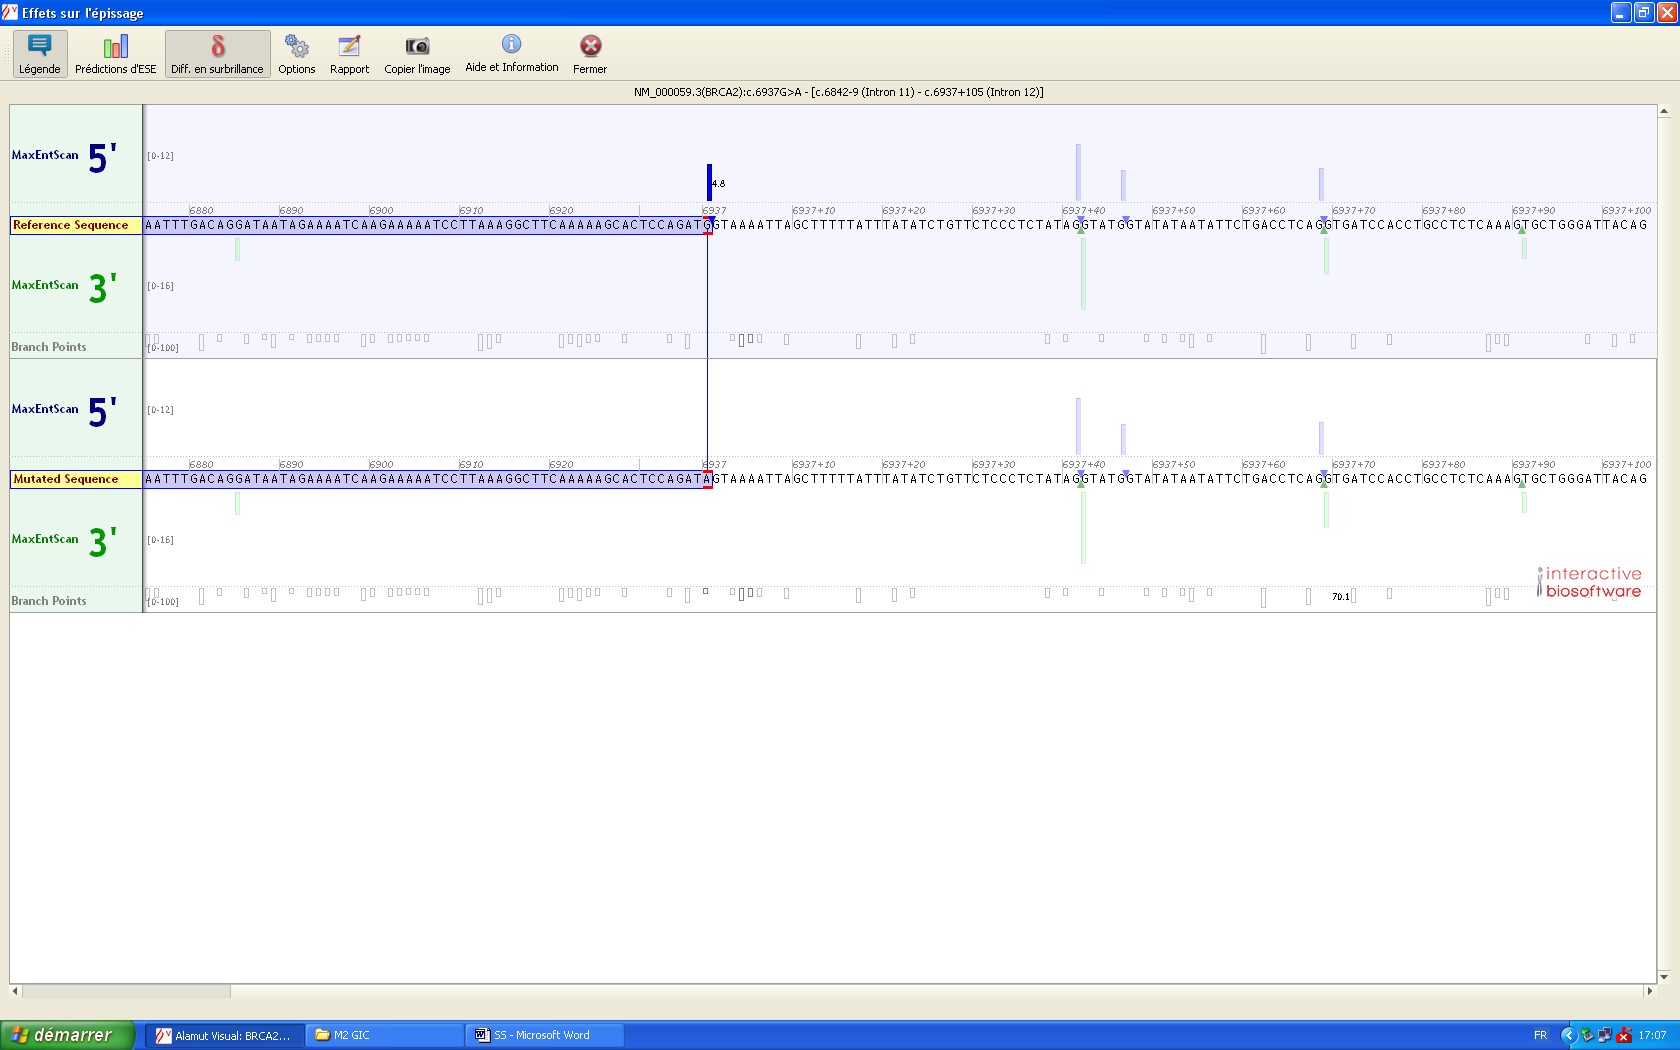

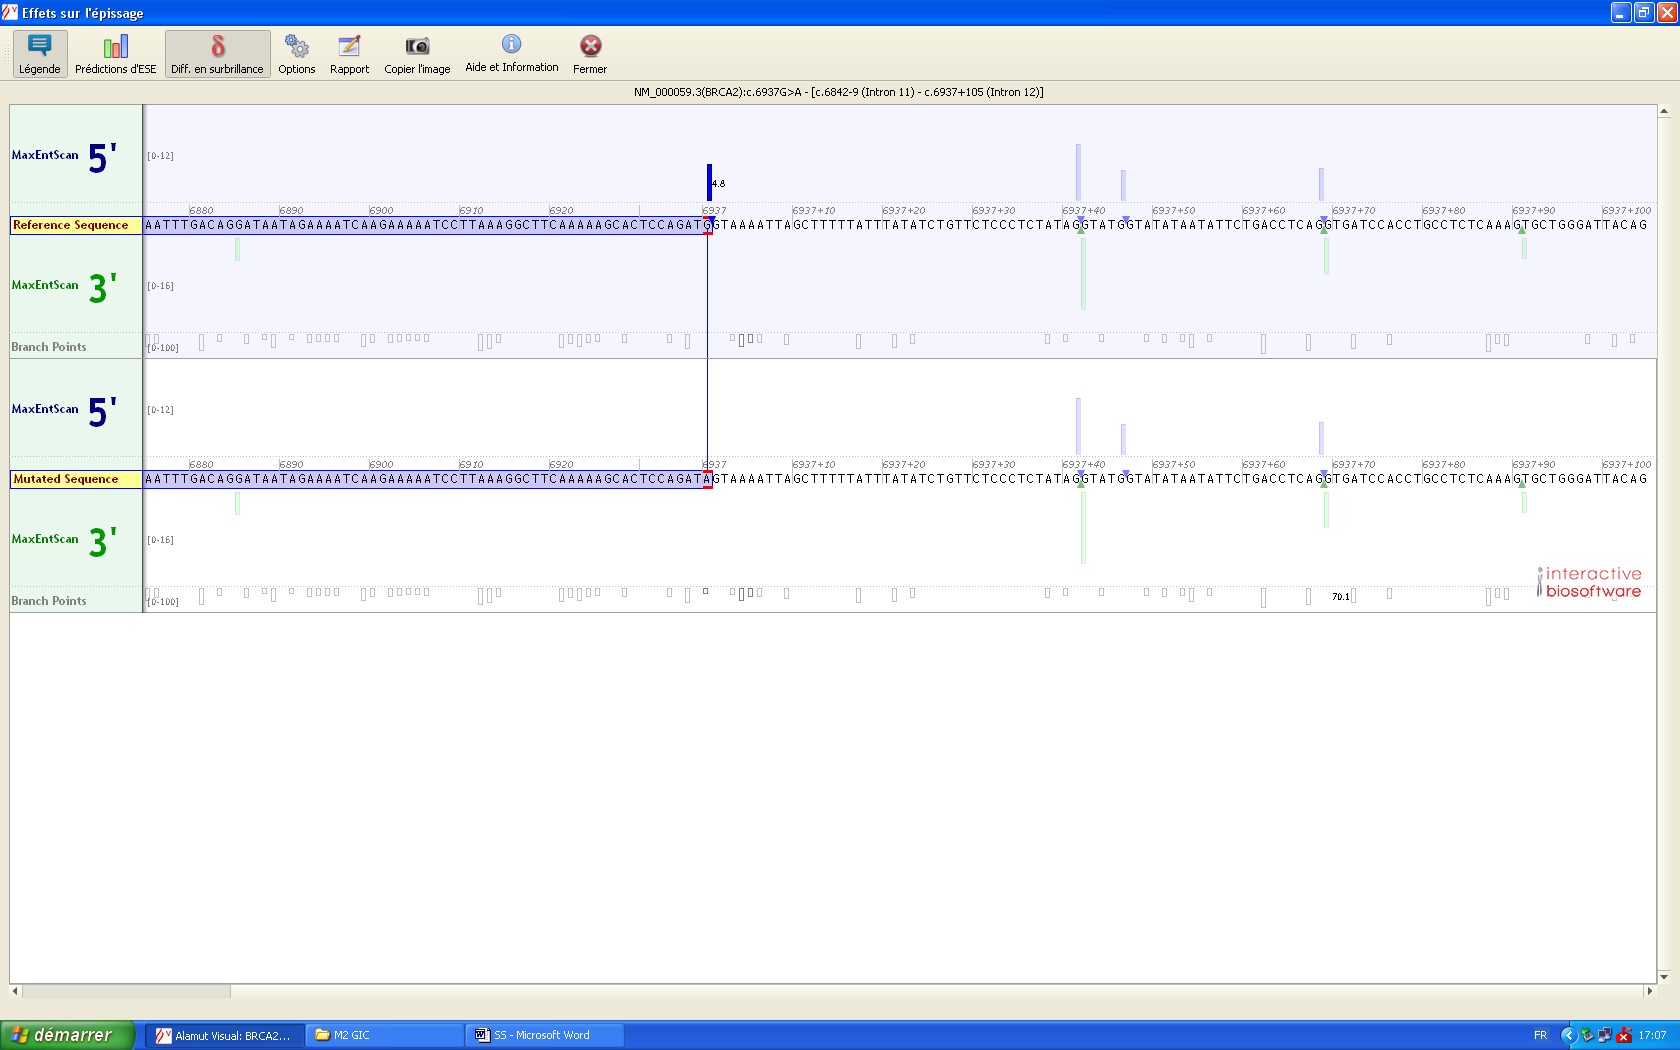


0

7.4

c.6937G>A

7.4

WT

4.8

4.8


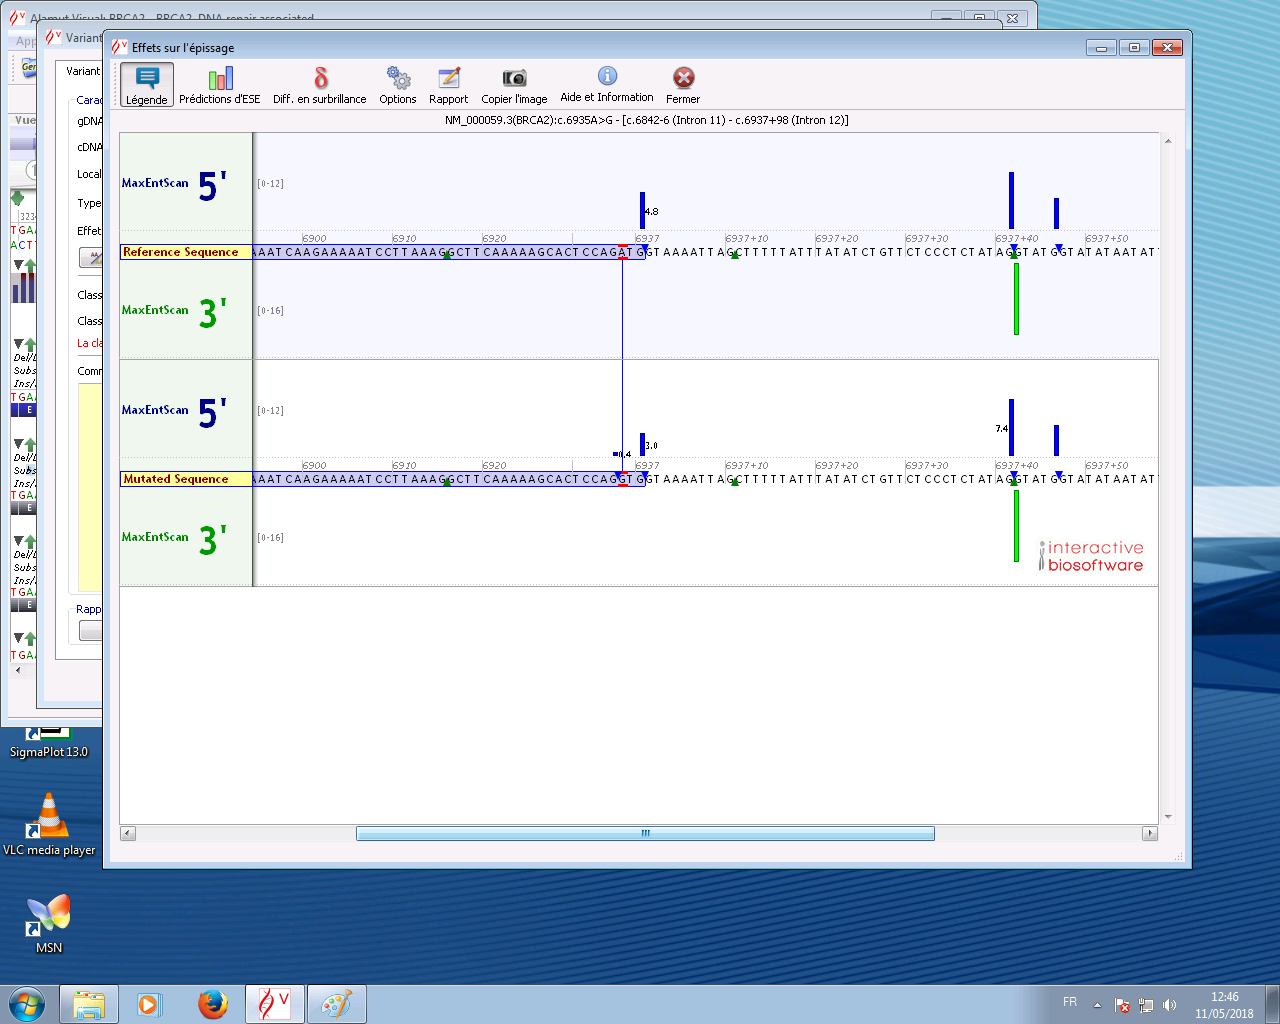

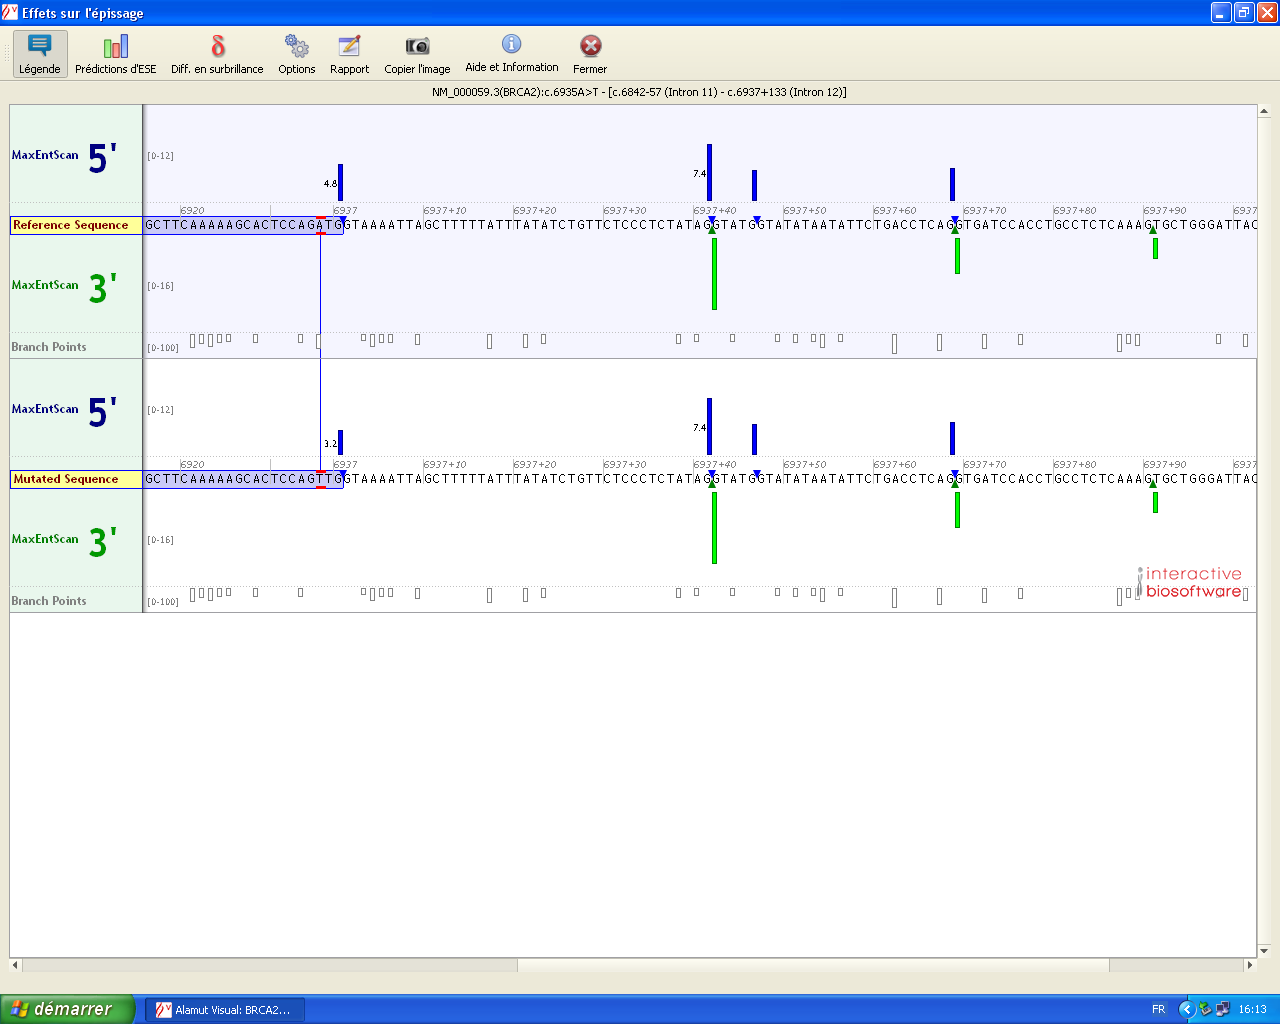


7.4

WT

c.6935A>G

3.2 (-33%)

7.4

c.6935A>T

0.4

3 (-38%)

7.4


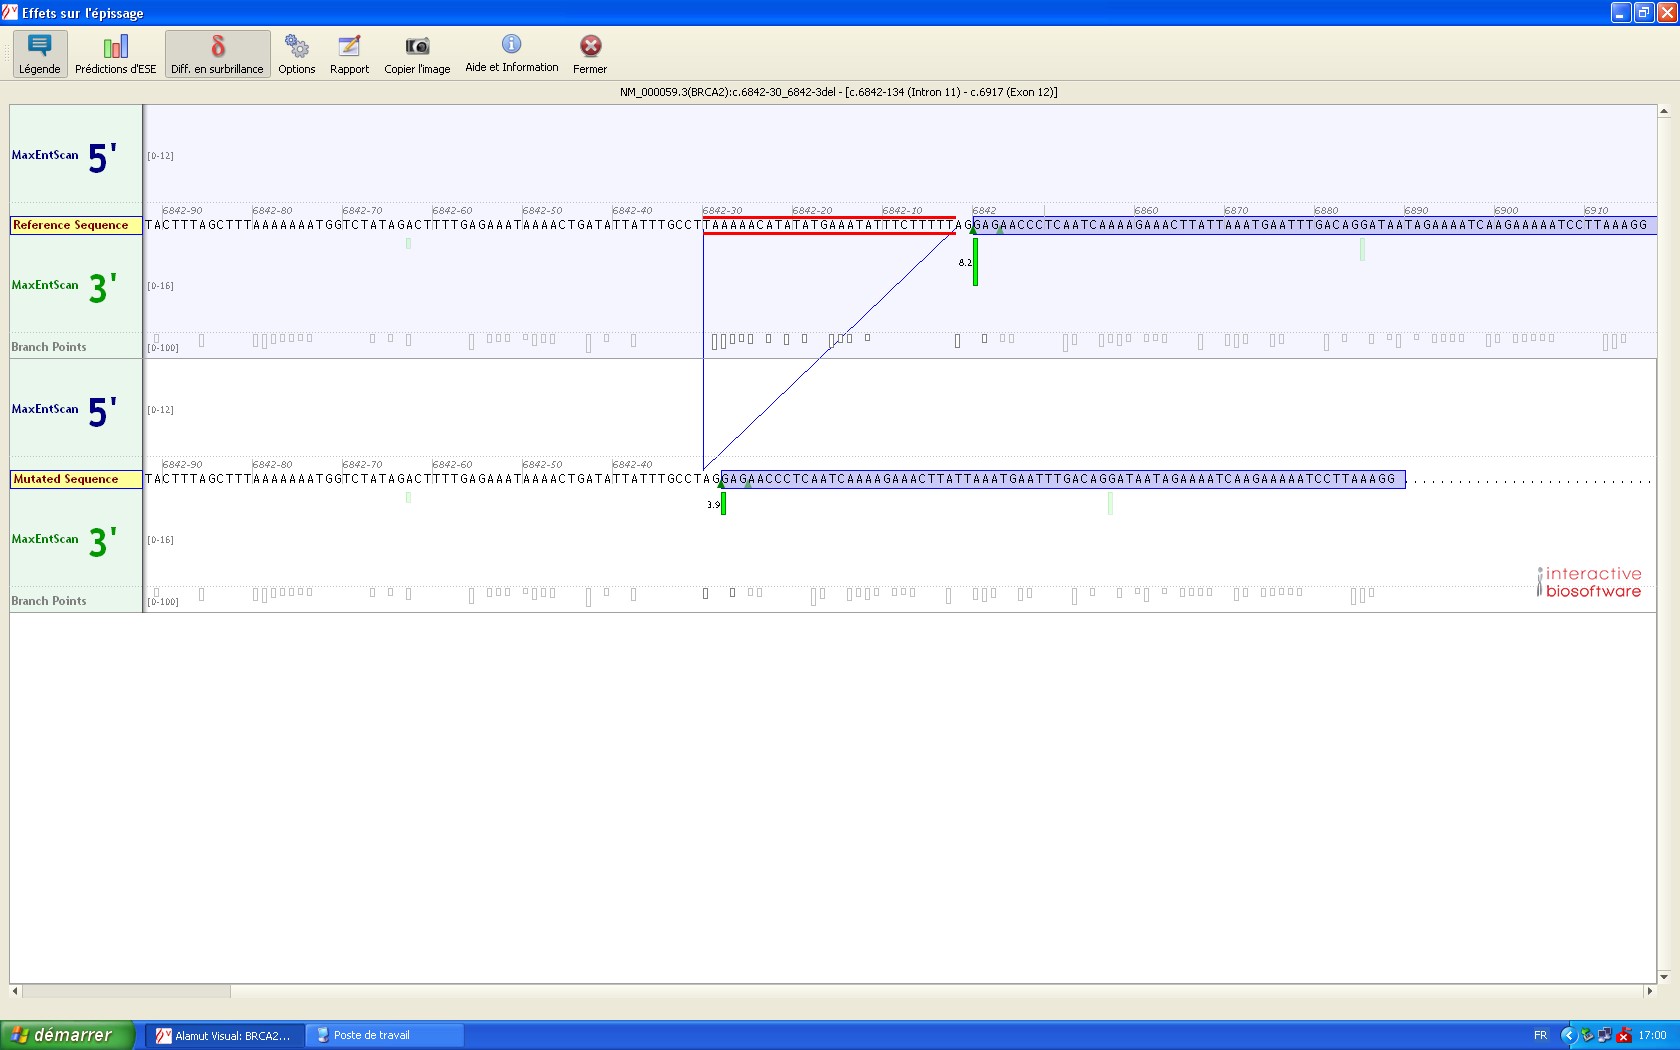


Natural

3’ ss

**E12**

I11


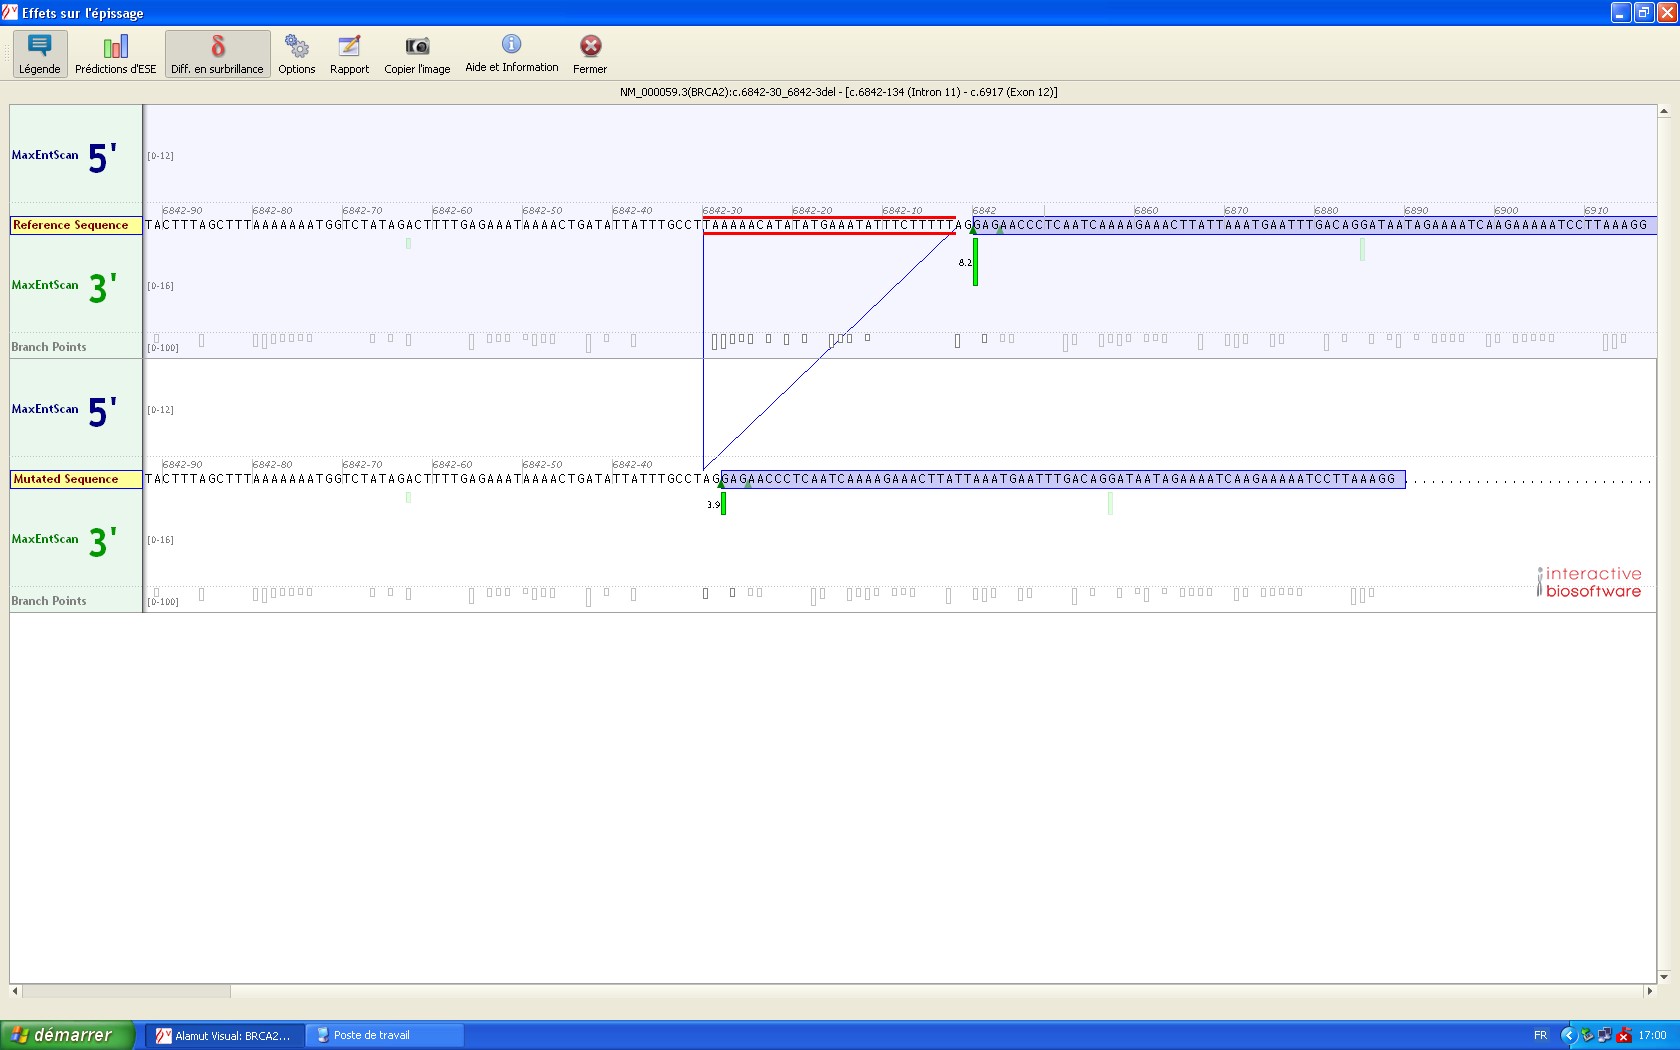


8.2

WT

c.6842-30

_6842-3del

3.9 (-52%)


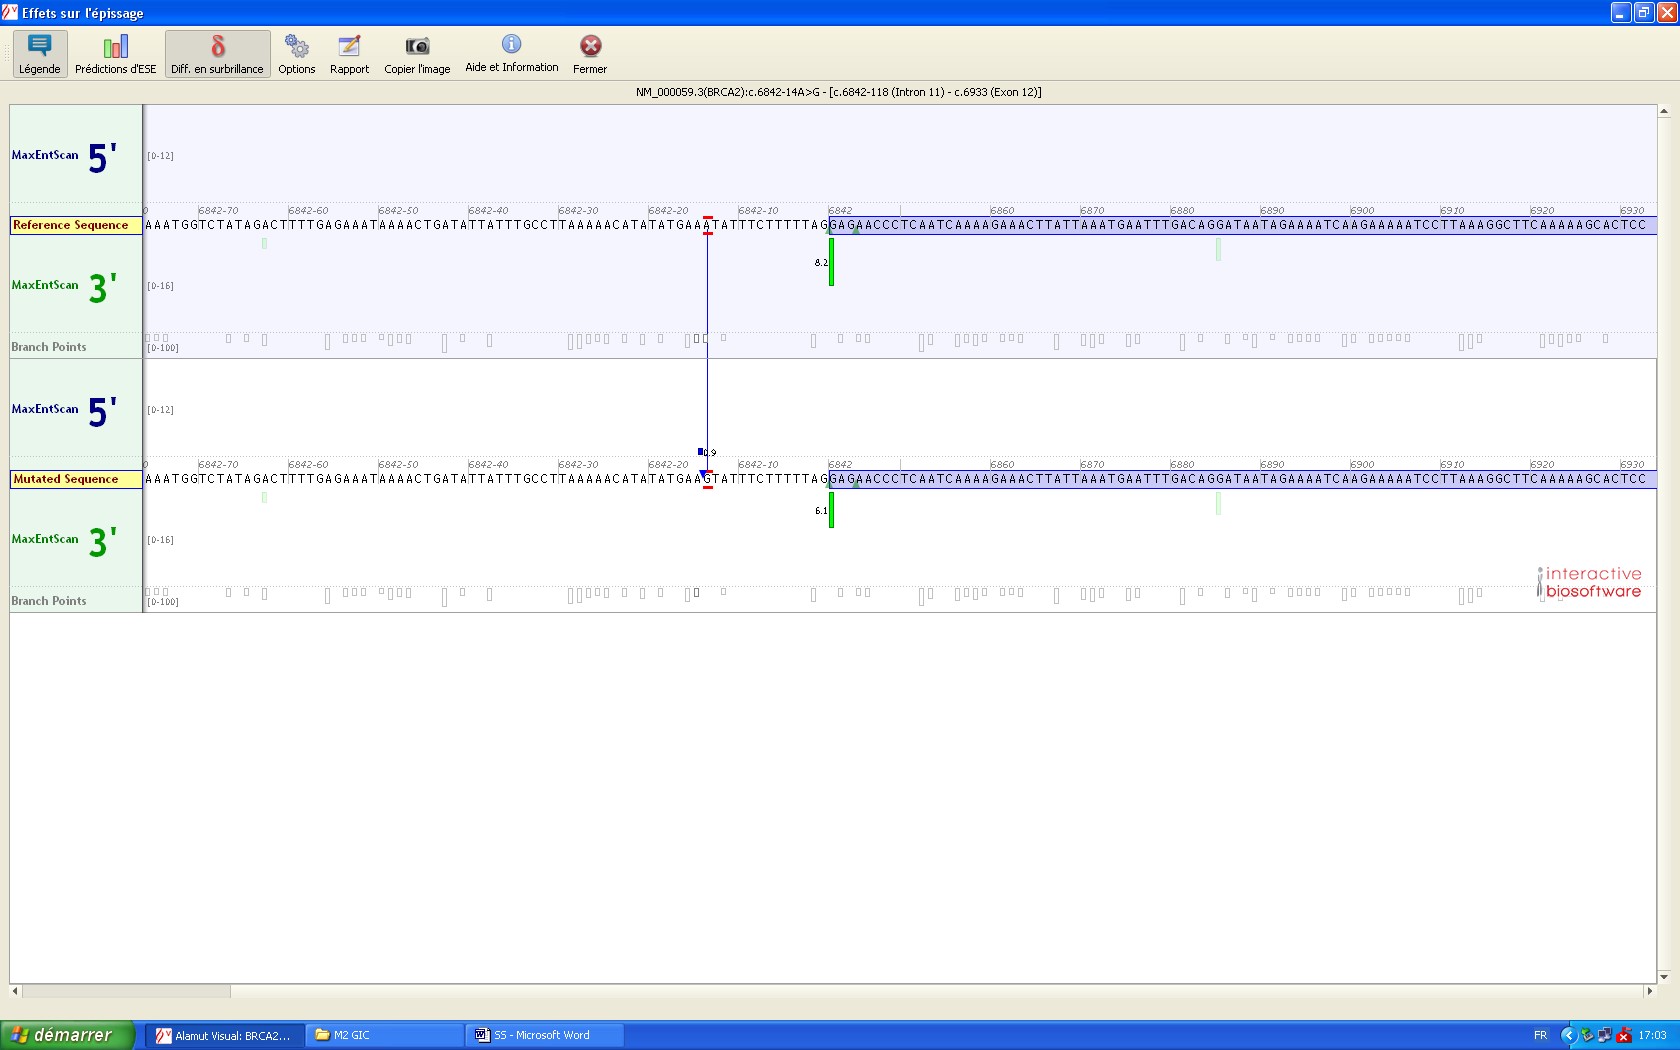

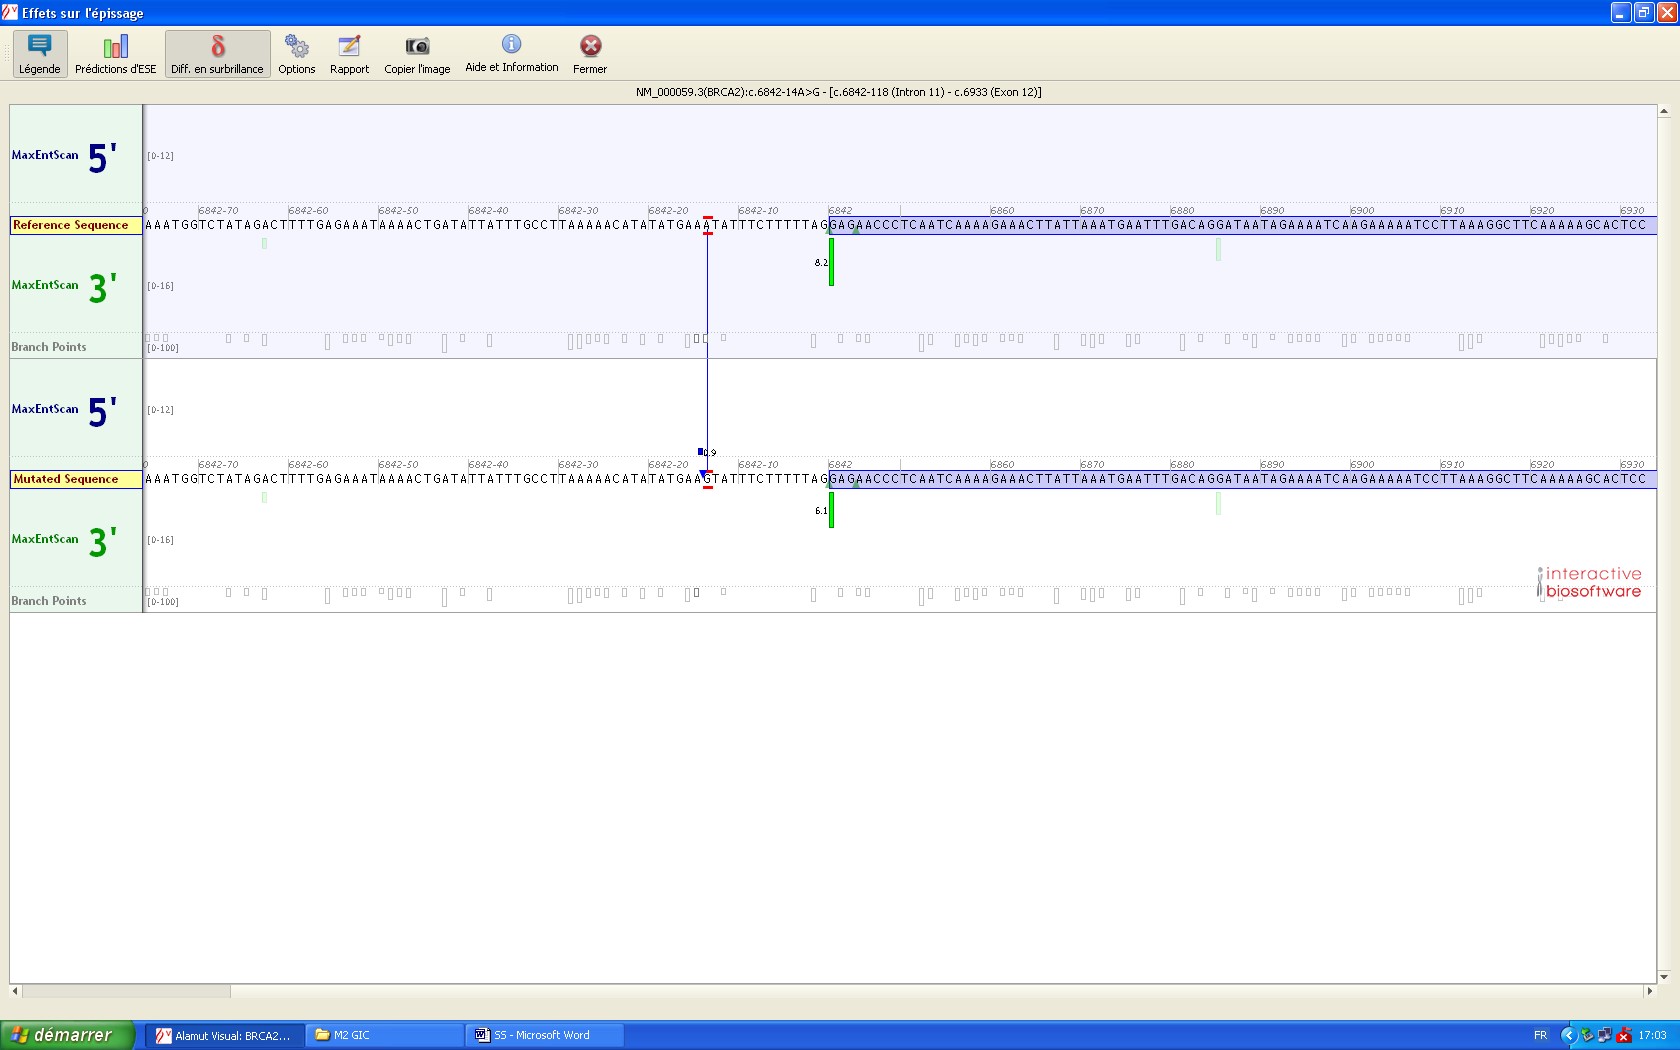


6.1 (-26%)

8.2

WT

c.6842-14A>G


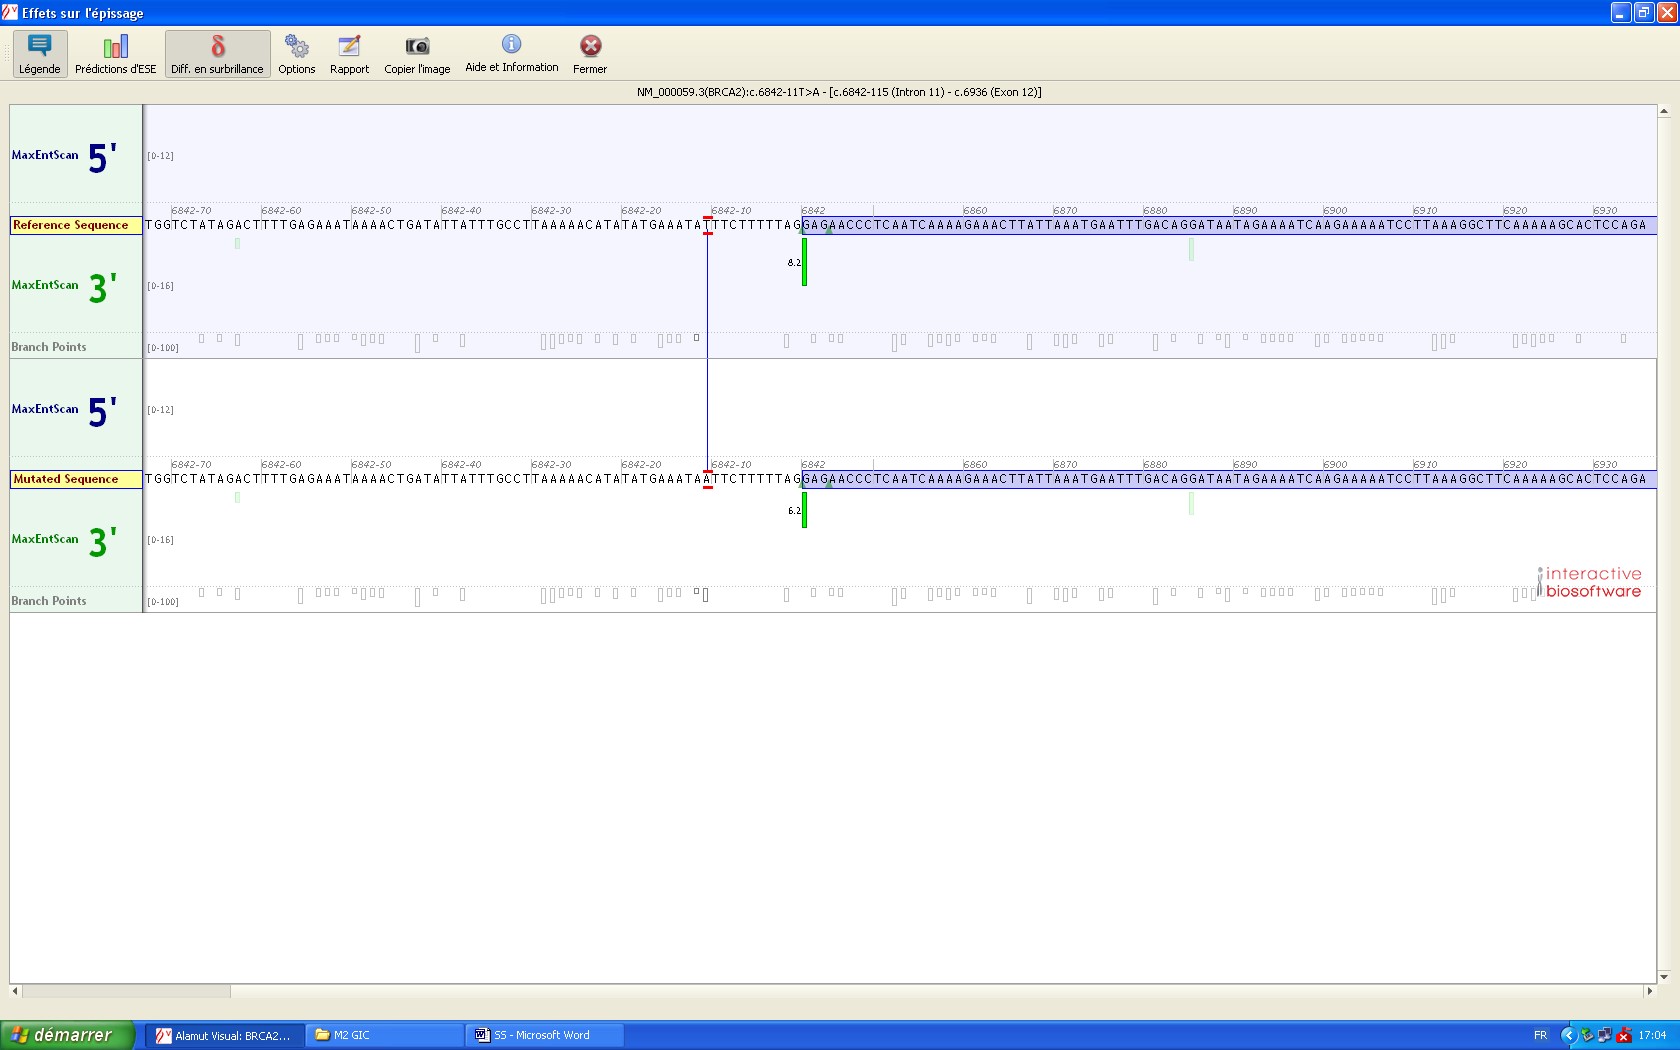

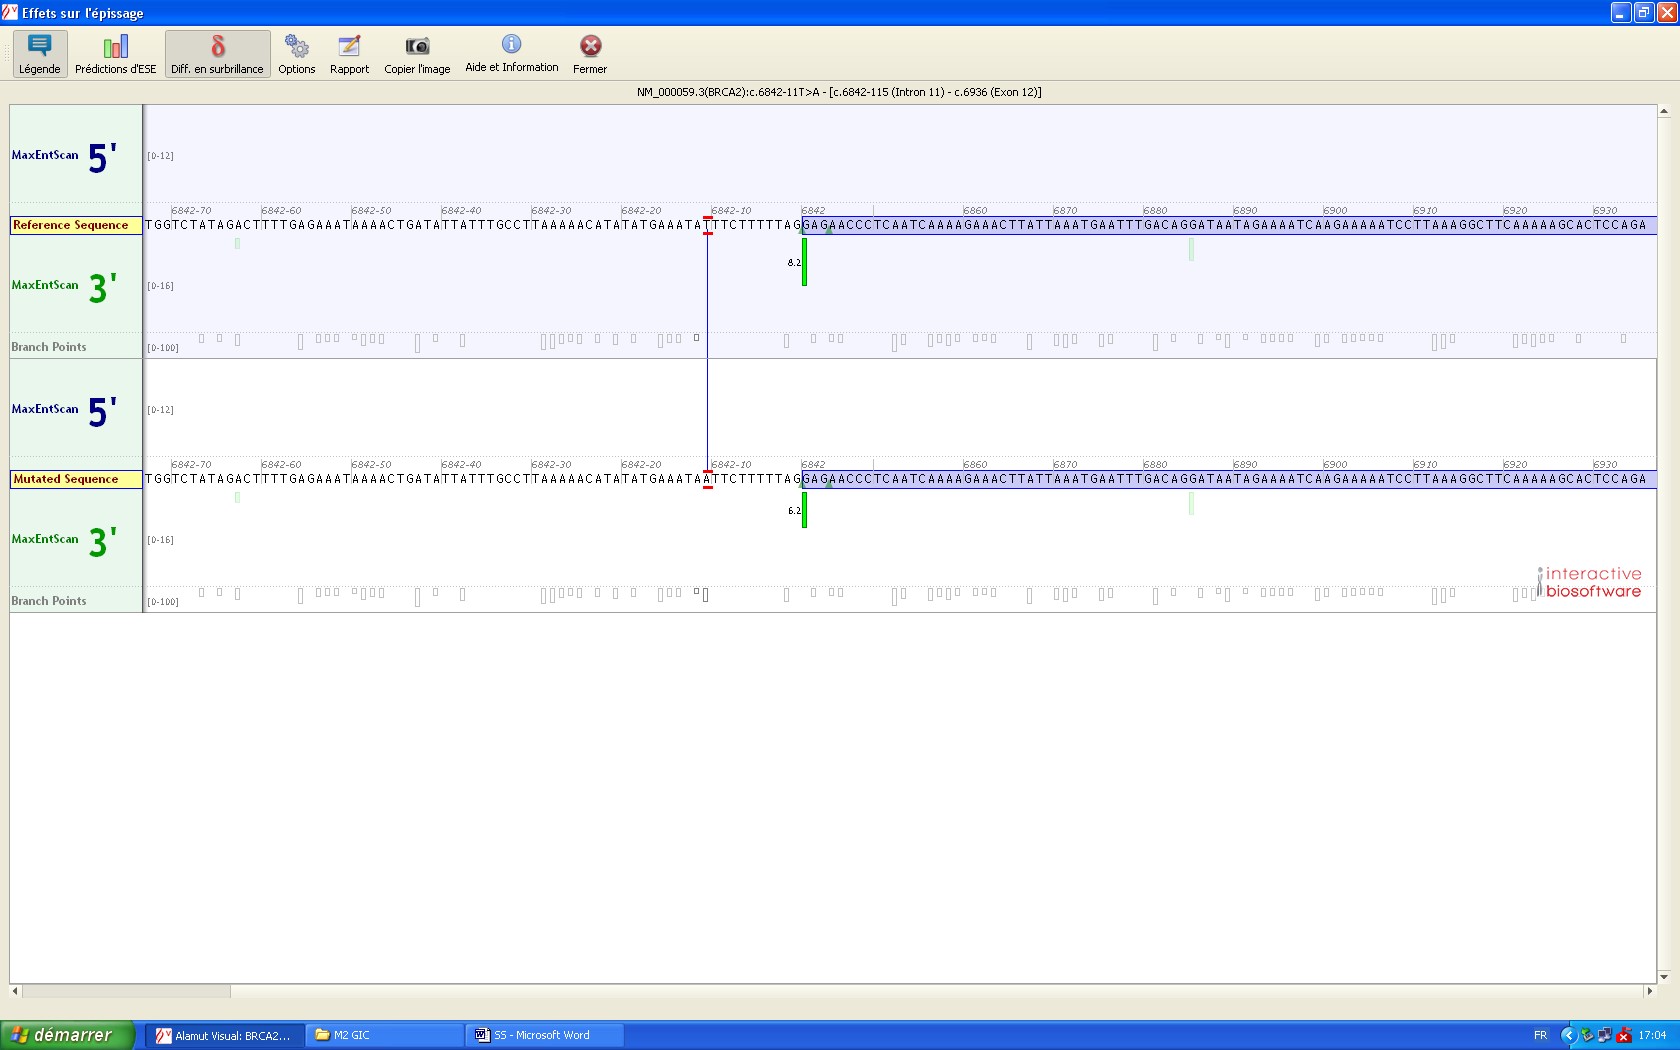


6.2 (-24%)

8.2

WT

c.6842-11T>A


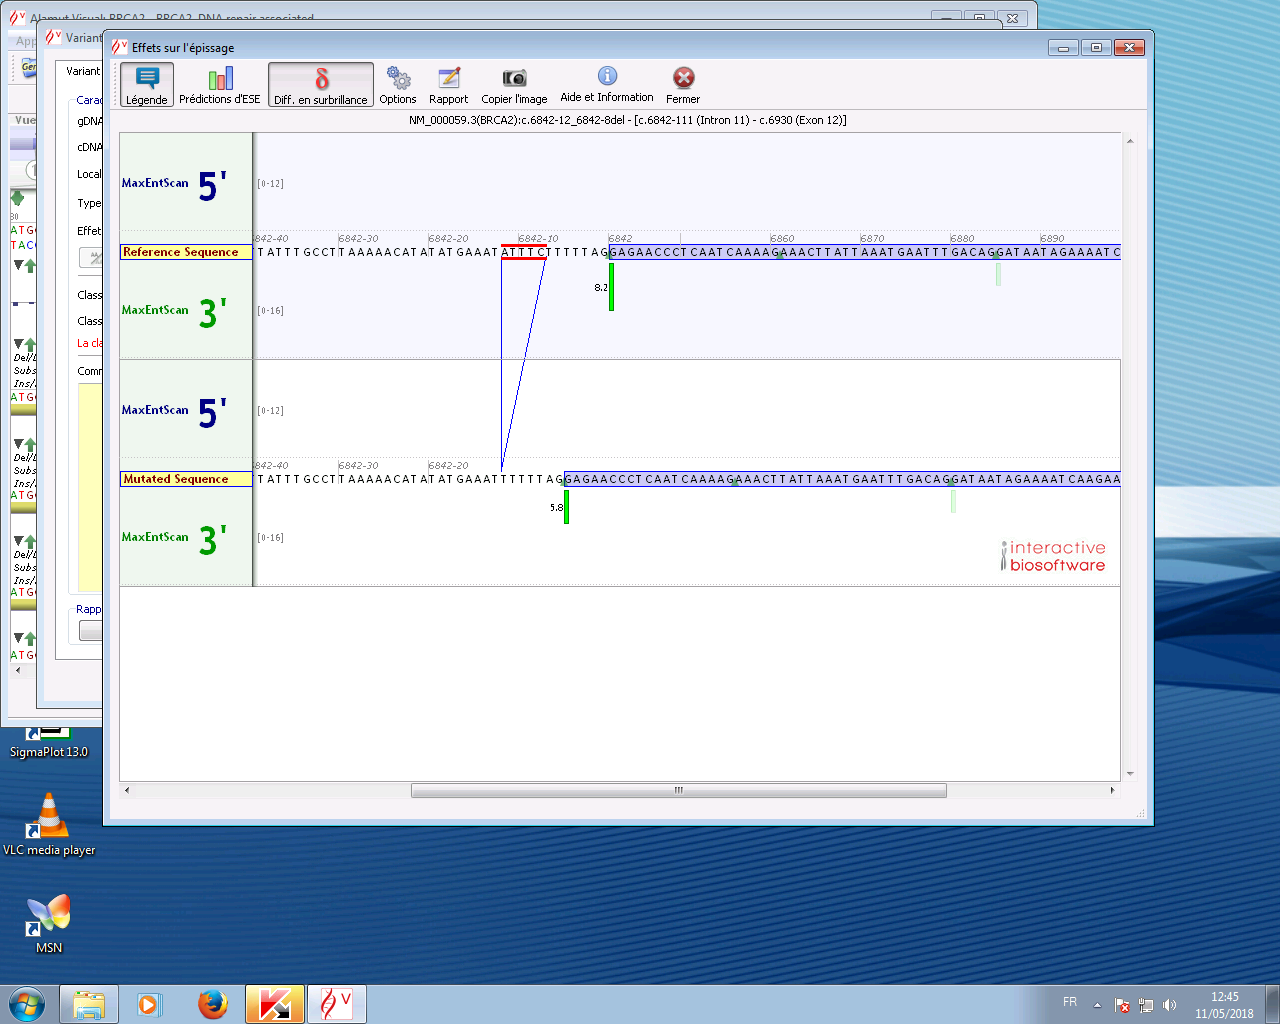

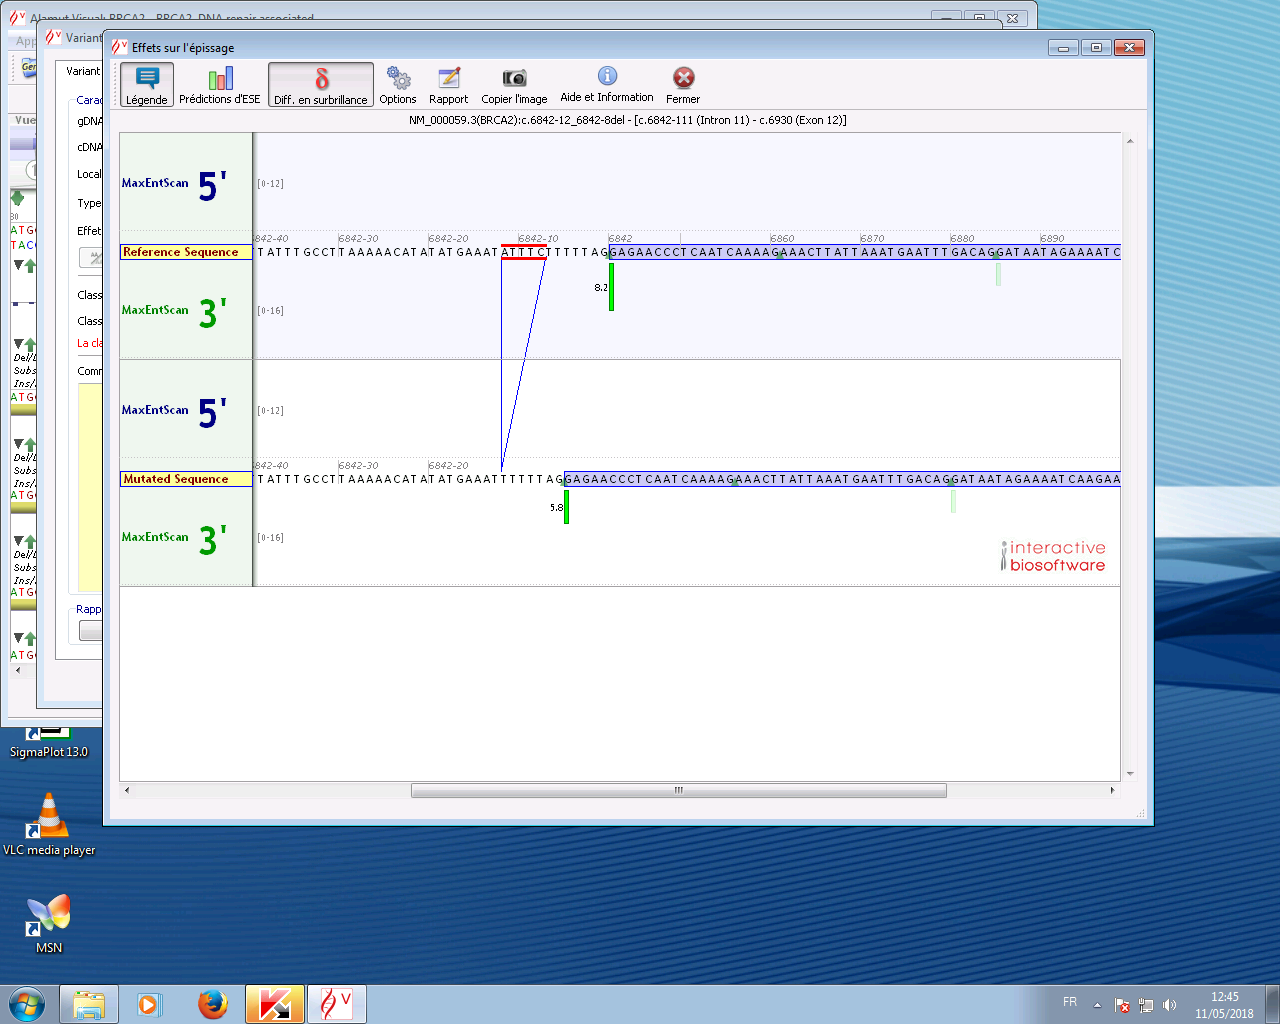


5.8 (-30%)

8.2

WT

c.6842-12

_6842-8del


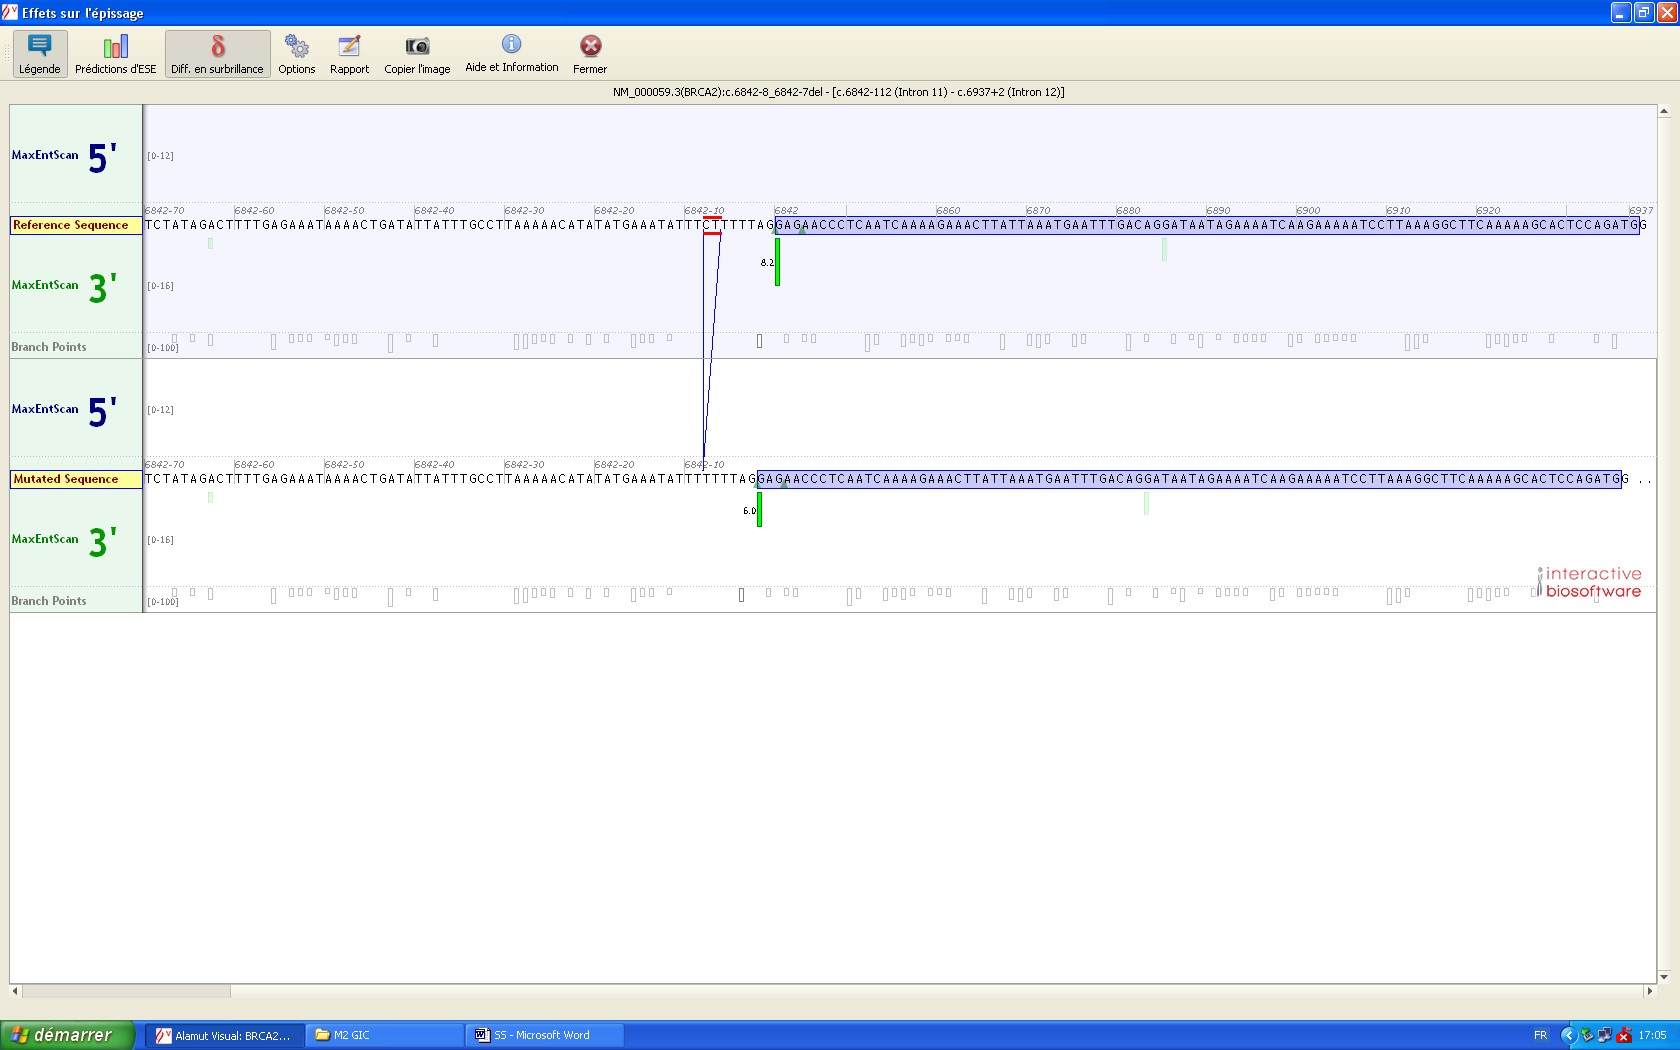

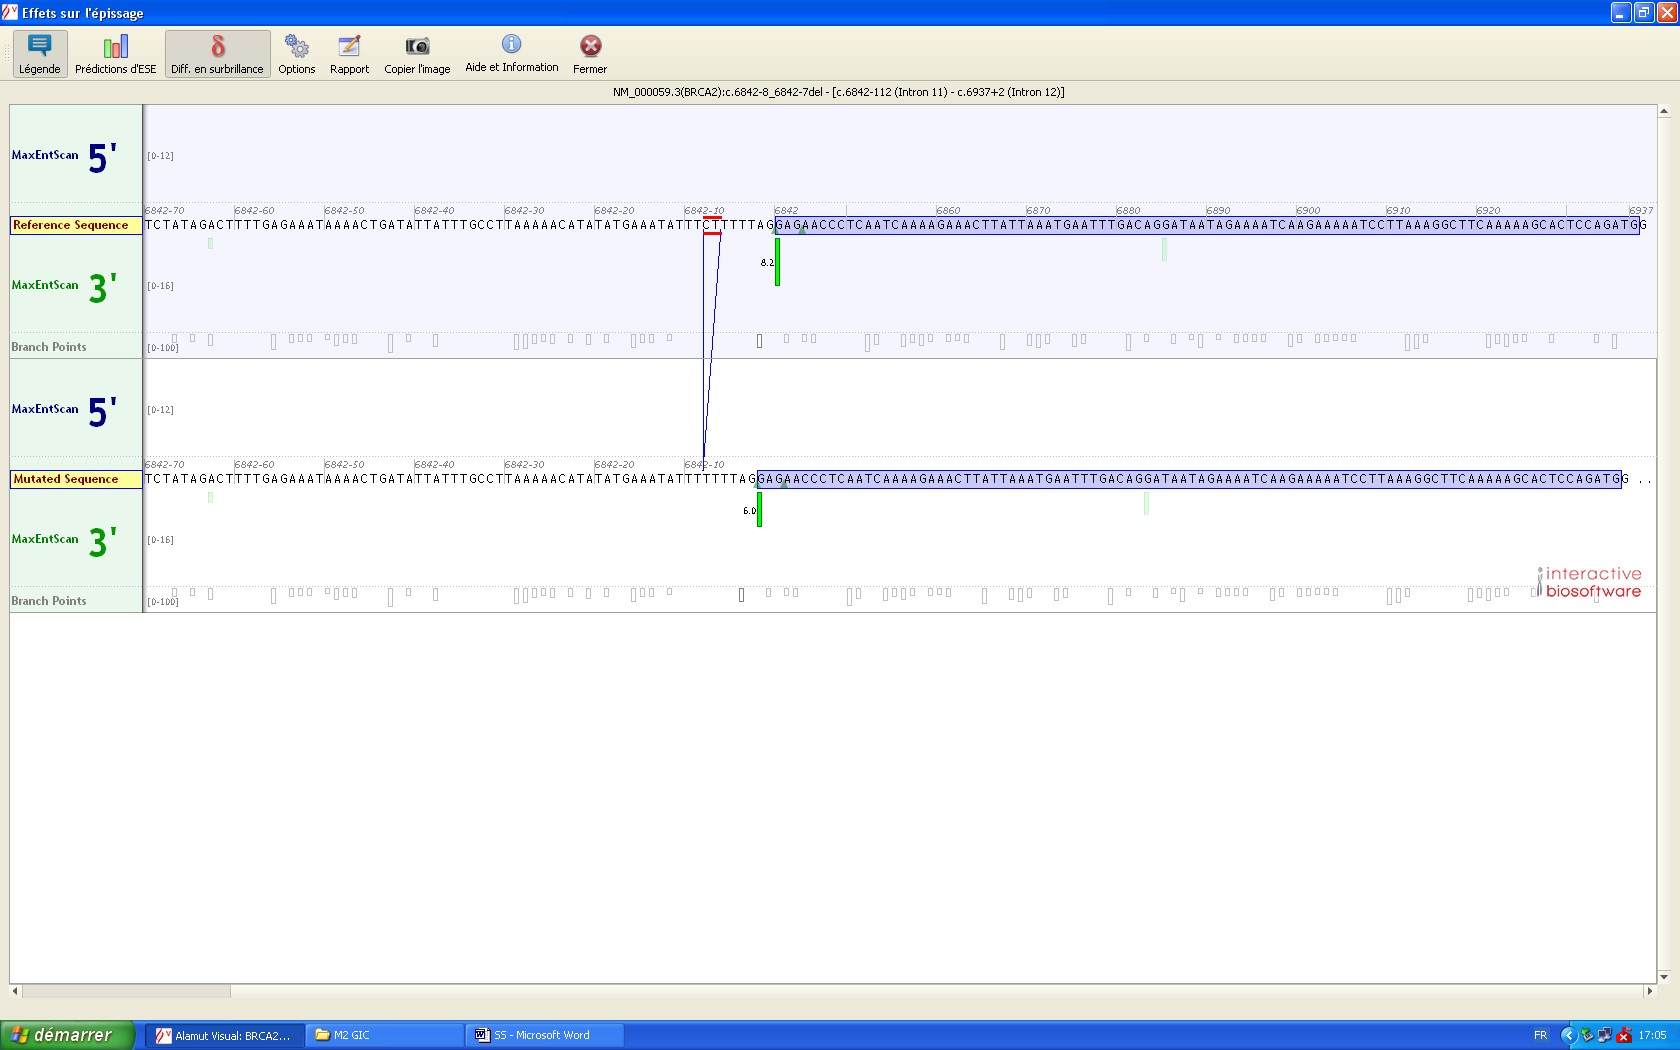


6 (-27%)

8.2

WT

c.6842-8

_6842-7del


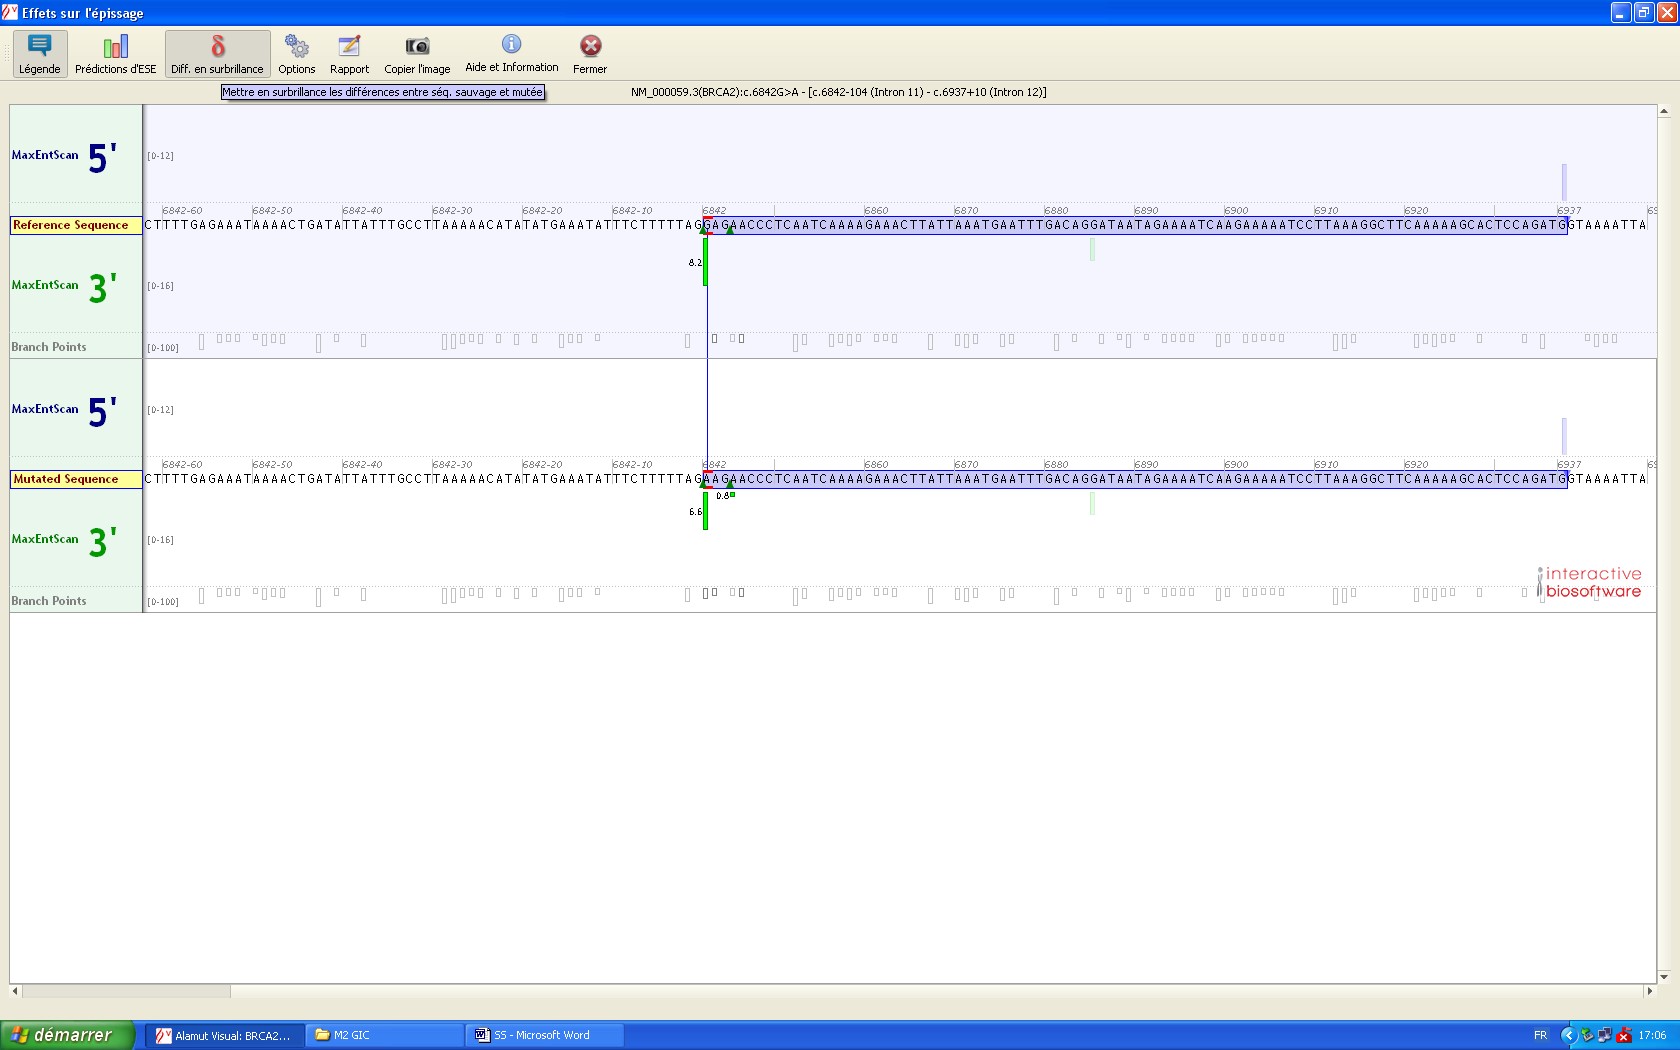

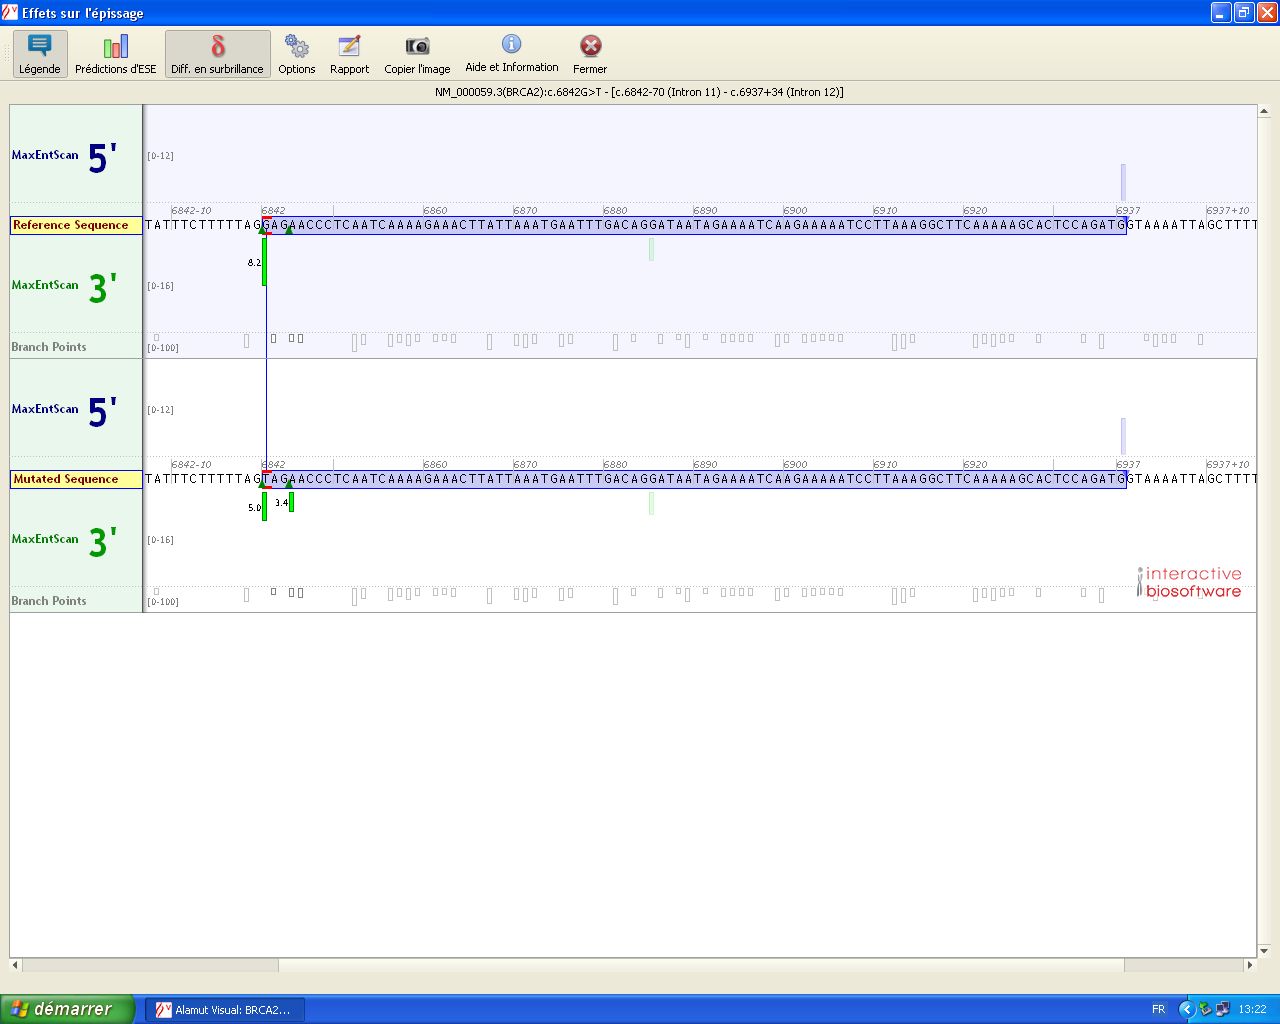

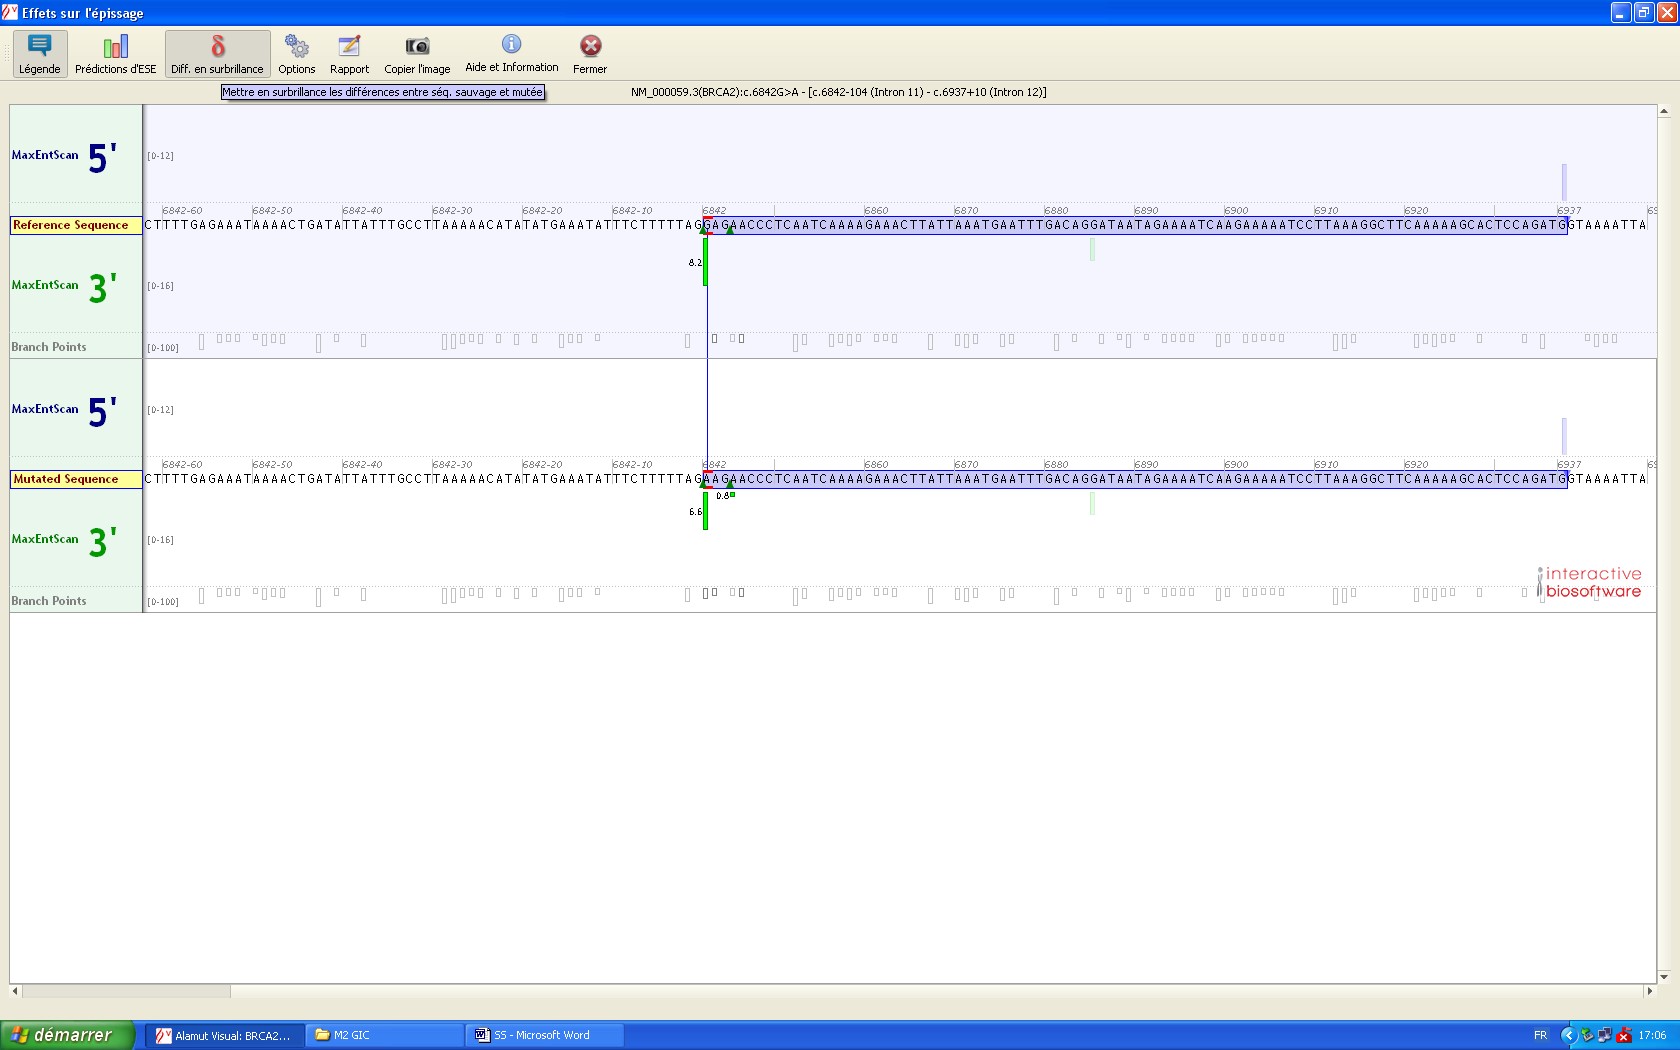

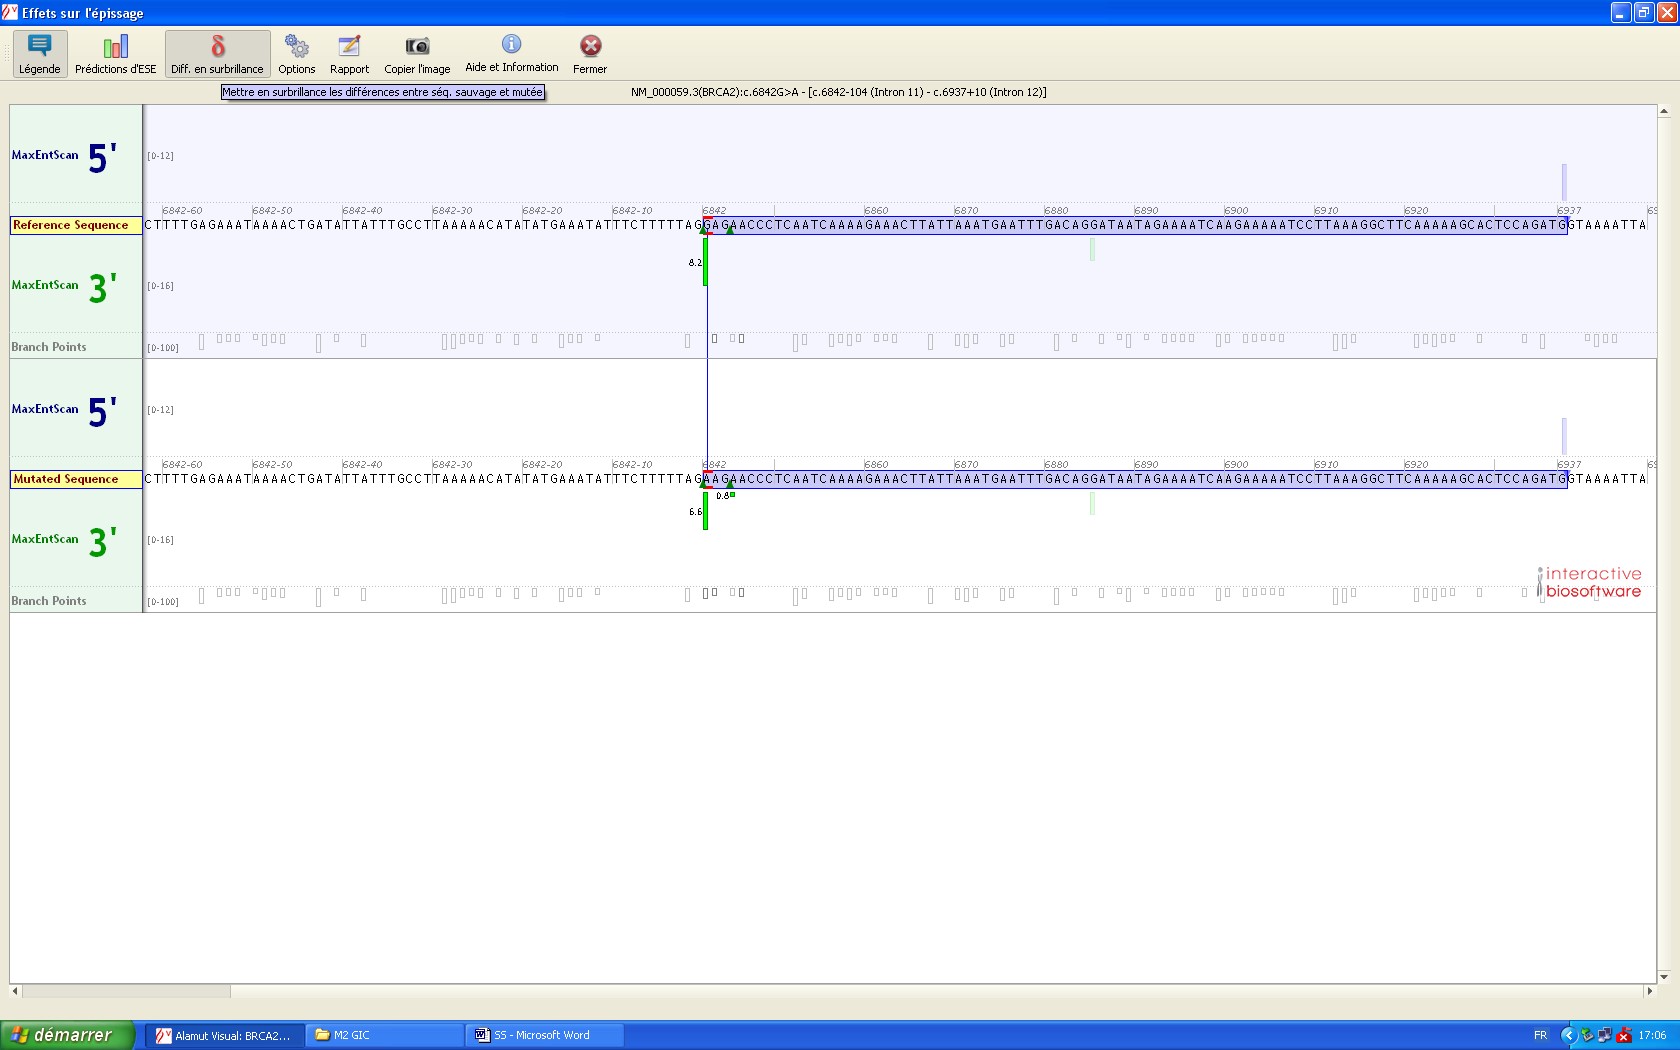


6.6 (-20%)

8.2

WT

c.6842G>A

0.8

c.6842G>T

3.4

5 (-39%)

*

*

**

**Figure S4. Bioinformatics analysis of variants predicted to alter 3’/5’ ss of *BRCA2* exon 12 (∆MES ≤ -15%)**

Bioinformatics predictions of the variant effects on 3’ or 5’ ss were performed based on the algorithm MaxEntScan (MES) (2), interrogated by using the integrated software Alamut Visual 2.9 (Interactive Biosoftware). For each variant, the MES score differences (∆MES) between wild-type (WT) and variant contexts are indicated between brackets for 3’/5’ natural ss. All these variants were selected for experimental analysis based on a ∆MES value inferior to -15%. In addition, the MES scores of new predicted 3’ (*) or 5’ (**) ss are indicated.

**Figure S5**


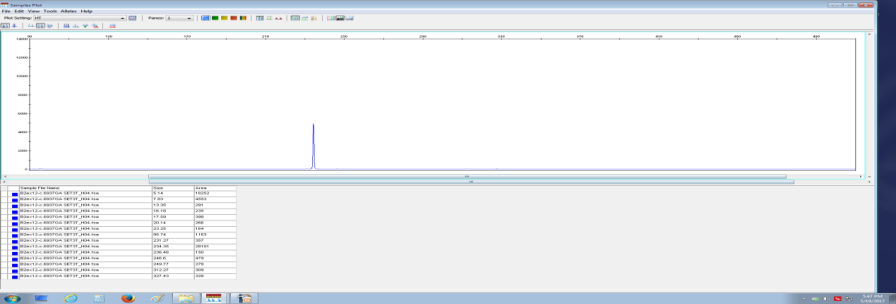

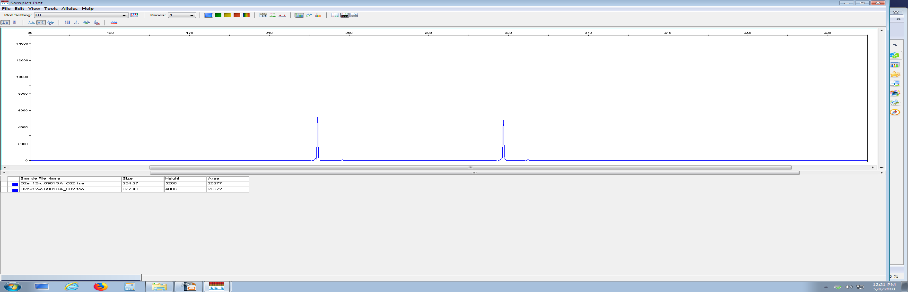

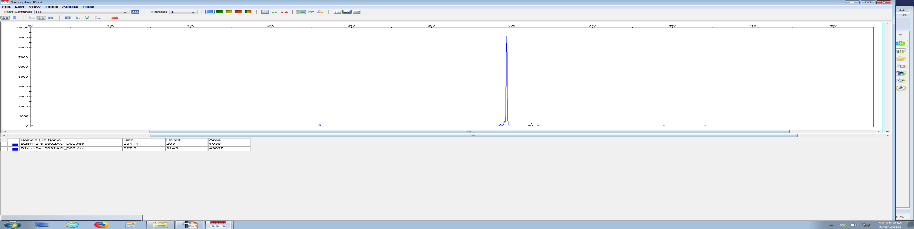

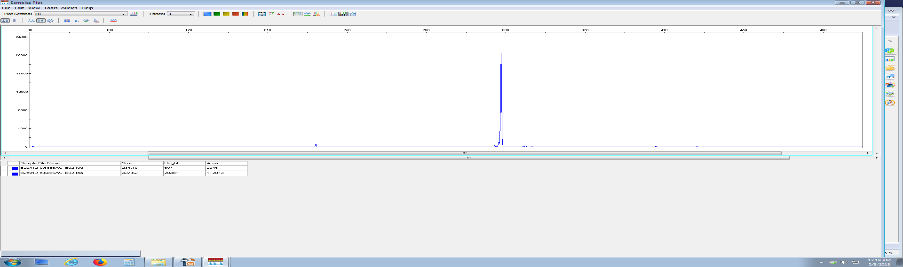

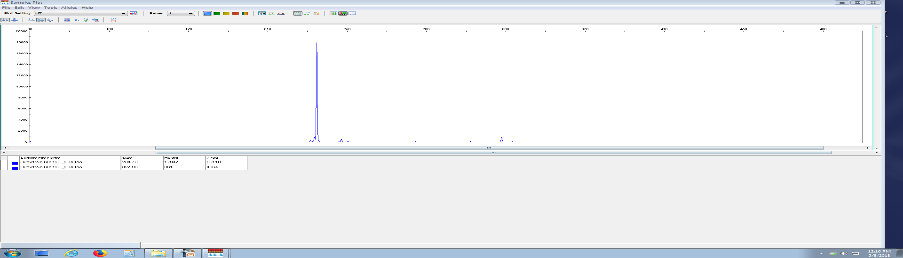

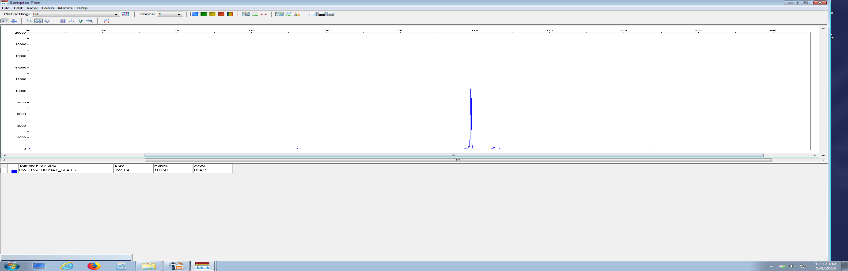

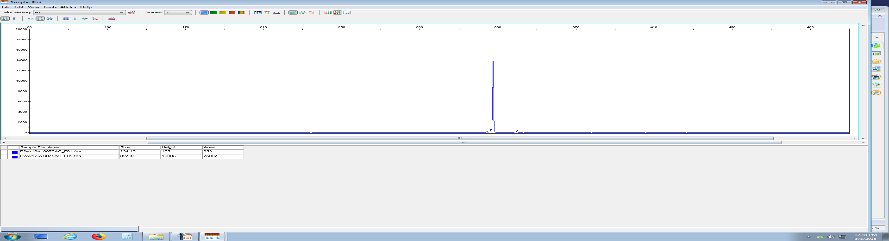

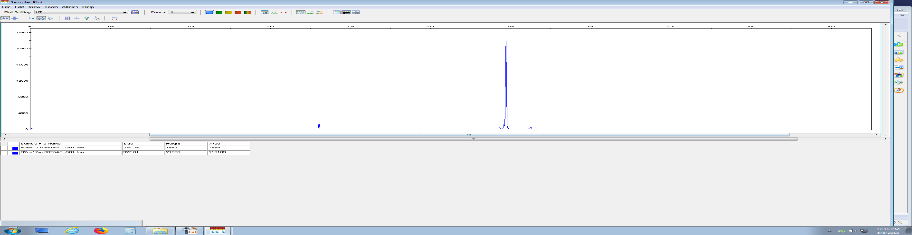

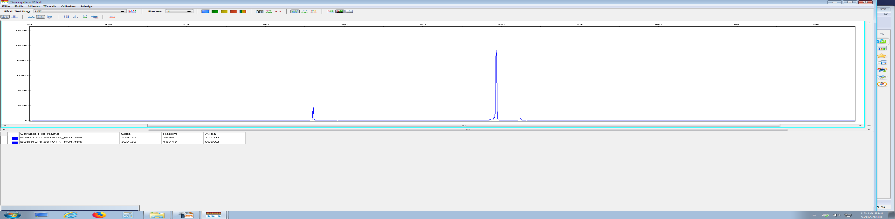

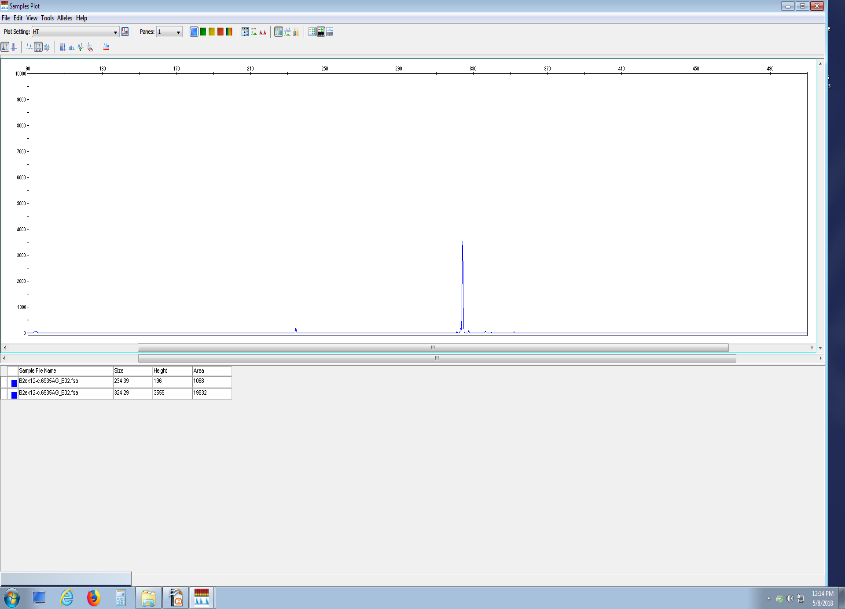

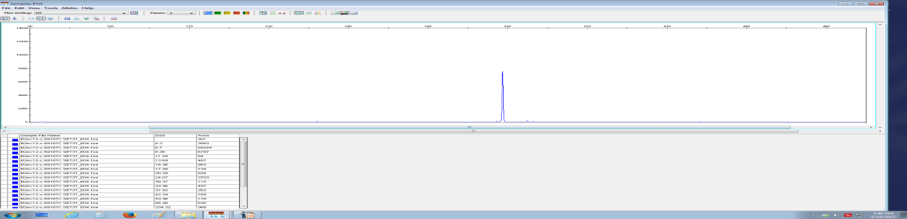

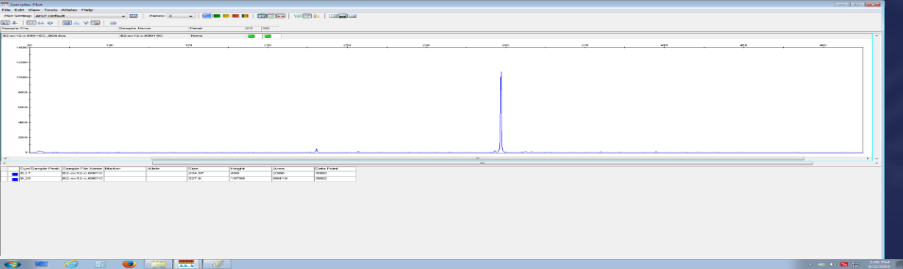

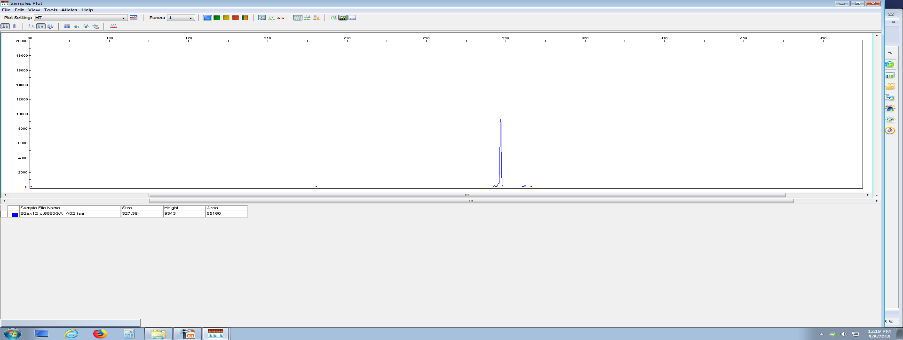

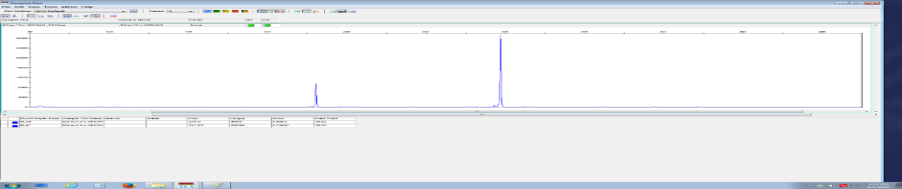

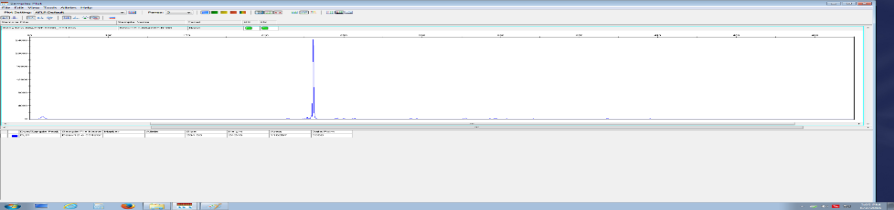

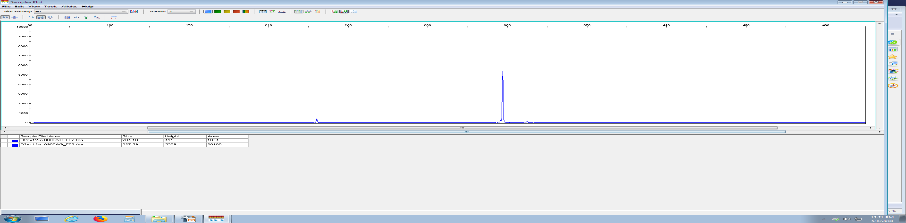

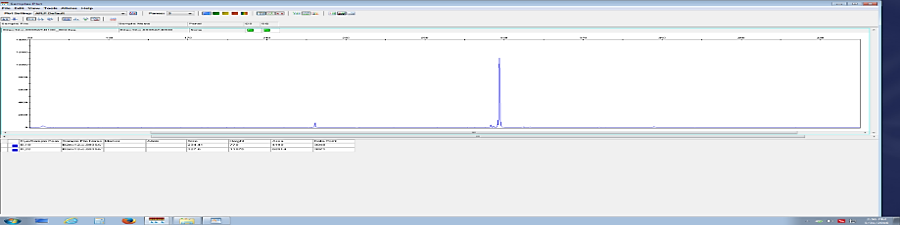

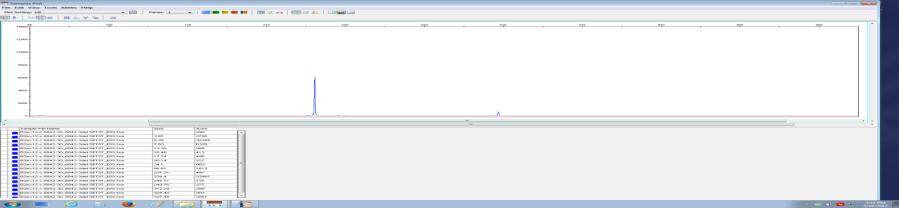

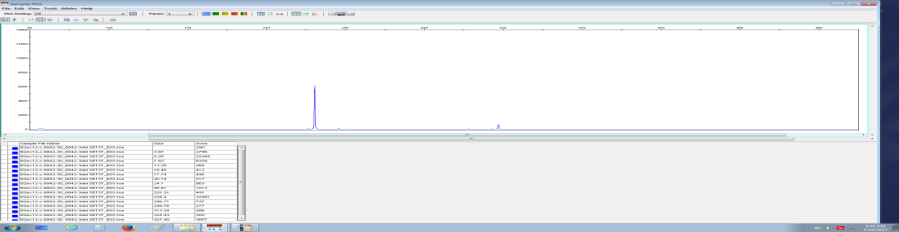

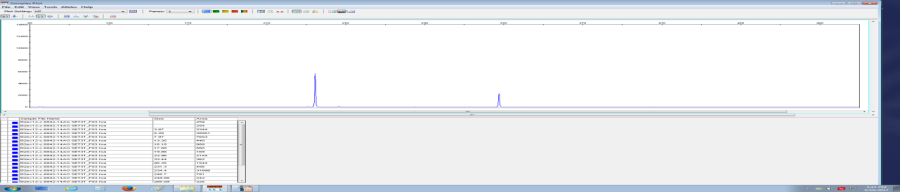

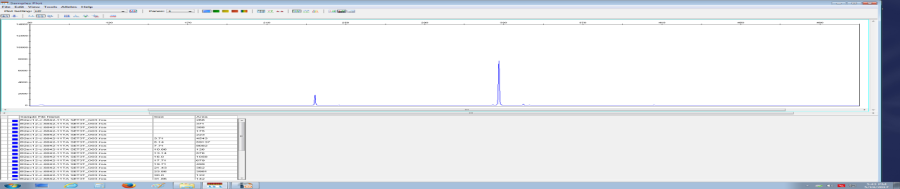

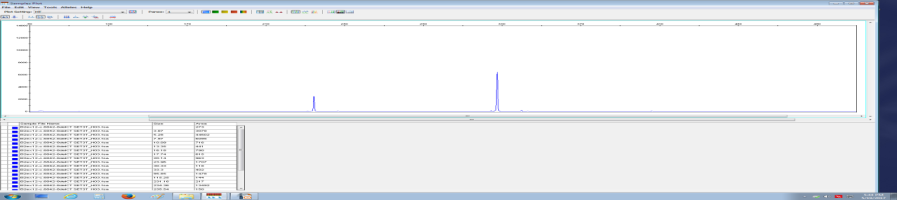

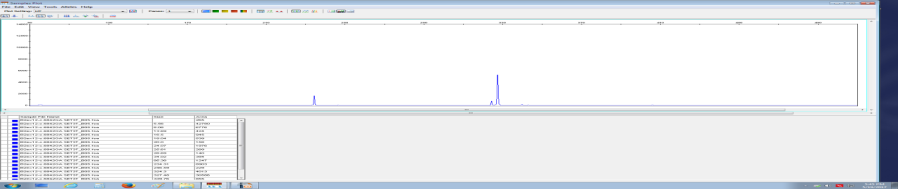

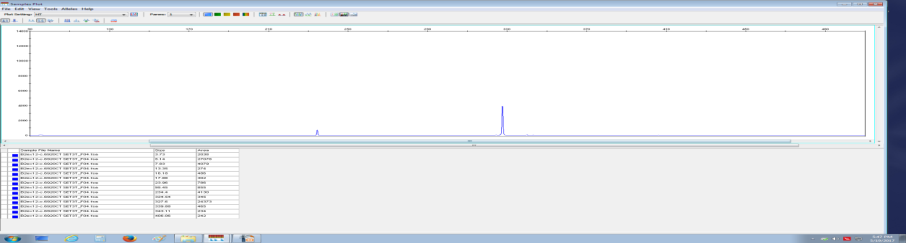

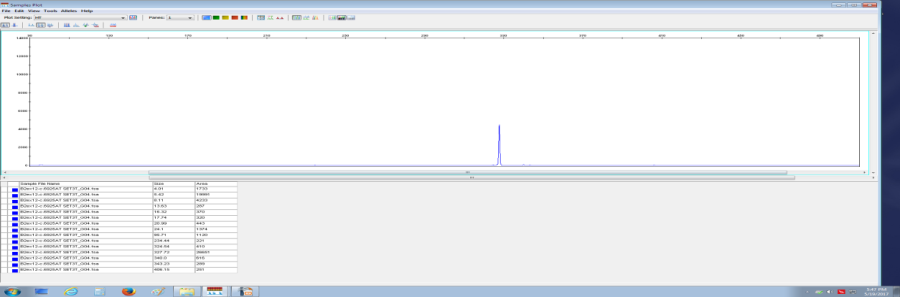


ΔE12

+E12

WT

76%

24%

12%

c.6842G>A


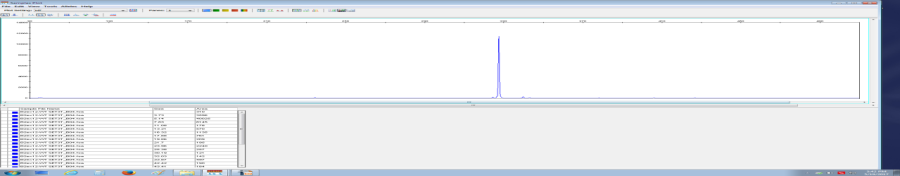


100%

88%

90%

c.6842-30_6842-3del

c.6842-14A>G

c.6842-12_6842-8del

c.6842-11T>A

c.6842-8_6842-7del

c.6842G>T

c.6935A>G

c.6935A>T

Fluorescence

c.6937G>A

10%

79%

21%

68%

32%

9%b

25%

66%

100%

100%

4%

96%

+E12p(del3)b

+E12q(del3)c

ΔE12

+E12

c.6879T>A


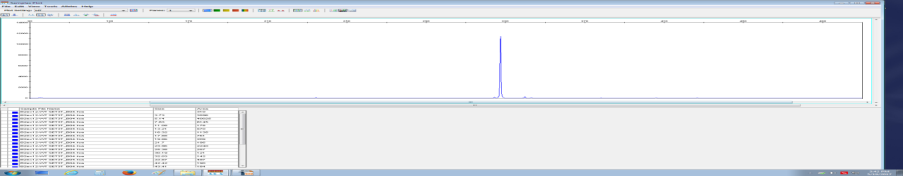


100%

c.6851C>T

c.6853A>G

c.6863A>T

c.6875A>C

c.6875A>T

c.6880G>A

c.6886A>C

c.6892G>A

c.6901G>C

c.6900A>G

c.6901G>A

c.6918T>C

c.6920C>T

c.6925A>T

Fragment size

100%

17%

83%

100%

16%

84%

97%

3%

**A**

**B**

8%

92% c

95%

5%

100%

100%

8%

92%

17%

83%

100%

3%

97%

3%

97%

8%

92%

42%

58%

Fluorescence

WT

Fragment size

**Figure S5. Capillary electrophoresis analyses of *BRCA2* exon 12 splicing patterns in minigene assays of variants predicted to alter 3’/5’ ss (A) or ESR (B)**

The *BRCA2* exon 12 splicing patterns of WT and mutant minigenes expressed in HeLa cells were assessed by fluorescent RT-PCR, as described in Materials and Methods. In order to quantify the relative levels of each RNA isoform, the fluorescent RT-PCR products were resolved by capillary electrophoresis on an automated genetic analyzer. For each variant, one representative electropherogram is shown. The different fluorescence peaks correspond to transcripts either without (∆E12) or with (+E12) exon 12. Additional isoforms, b and c, deleted either for the first (+E12p(del3)) or the last (+E12q(del3)) 3 nucleotides of exon 12 were detected for c.6842G>A and c.6935A>G, respectively. In parallel, the previously described spliceogenic c.6853A>G variant (1) was analyzed. Peak areas were used to quantify the relative levels of each transcript, expressed as percentage and correspond to the average of at least three independent experiments (see Figure 2).

**Figure S6**


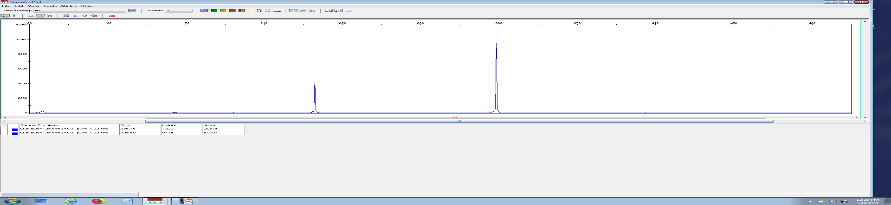

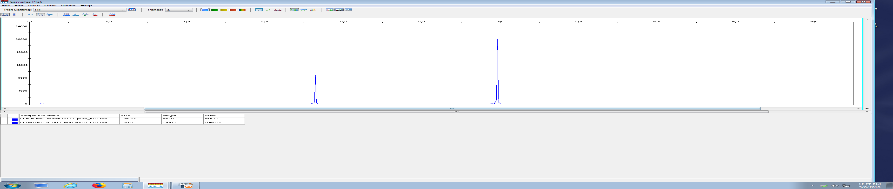

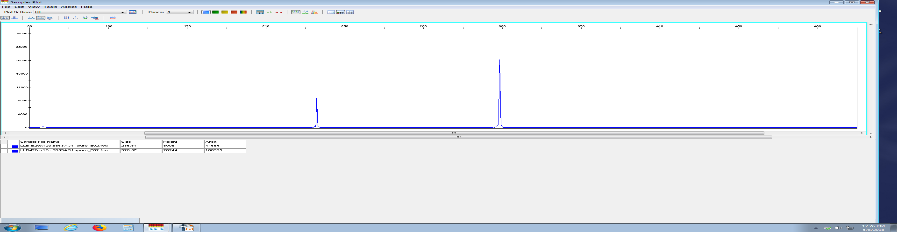

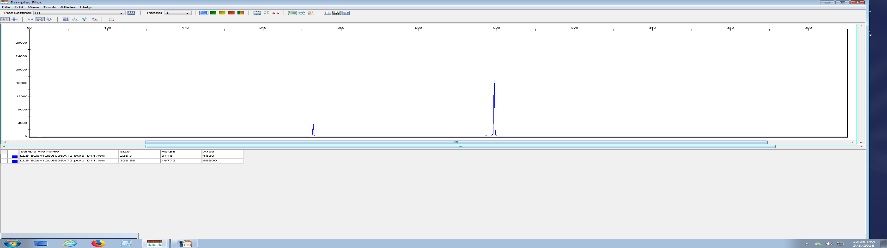

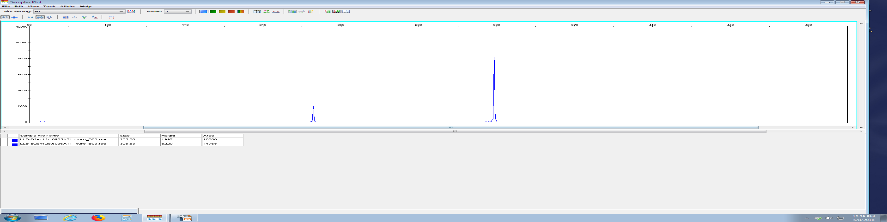

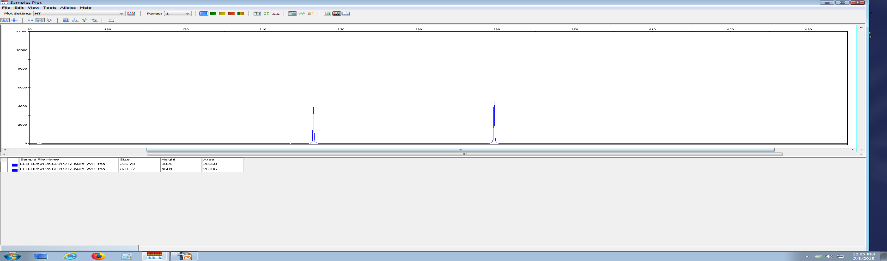

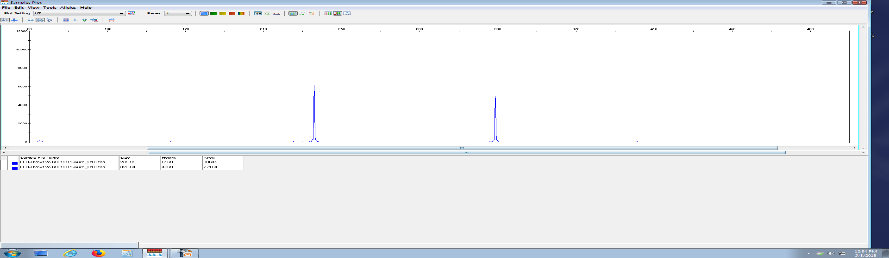

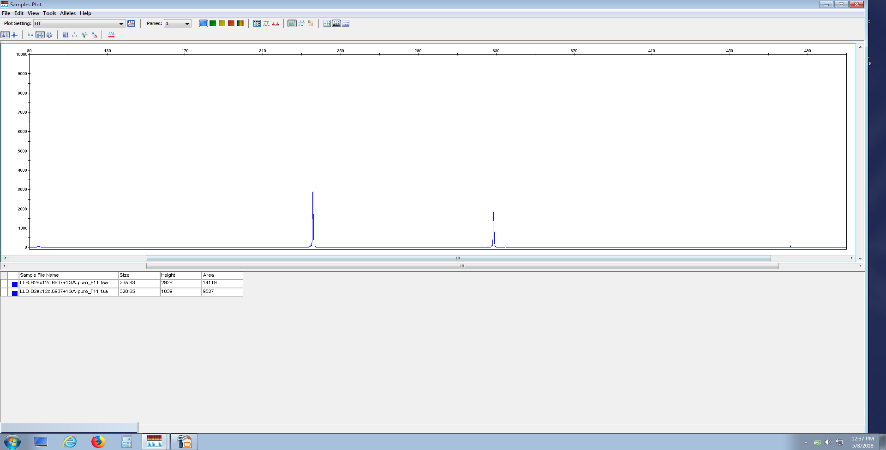

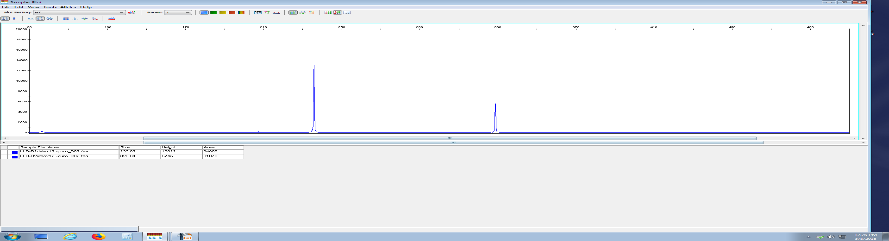

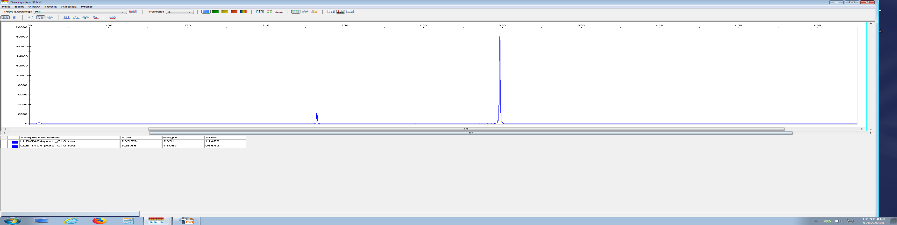

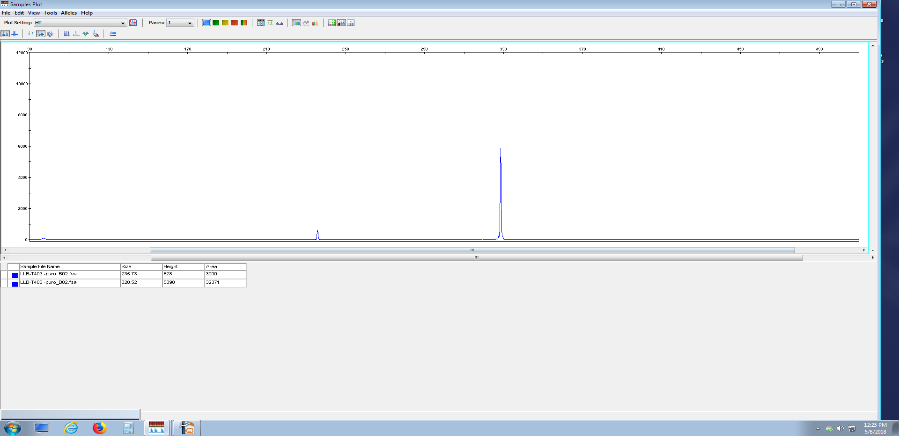

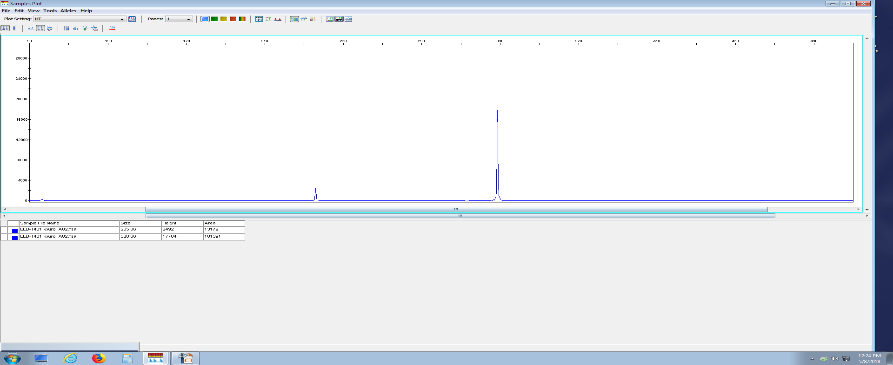


64%

48%

46%

DelE12

61%

c.6937+1G>A

52%

**1**

**2**

**c.6901G>T**

18%

82%

82%

2

1

1

2

3

c.6935A>T

72%

28%

29%

71%

72%

28%

Fluorescence

Fragment size

ΔE12

+E12

89%

1

Controls

91%

89%

2

3

11%

11%

9%

36%

39%

c.6853A>G

54%

18%


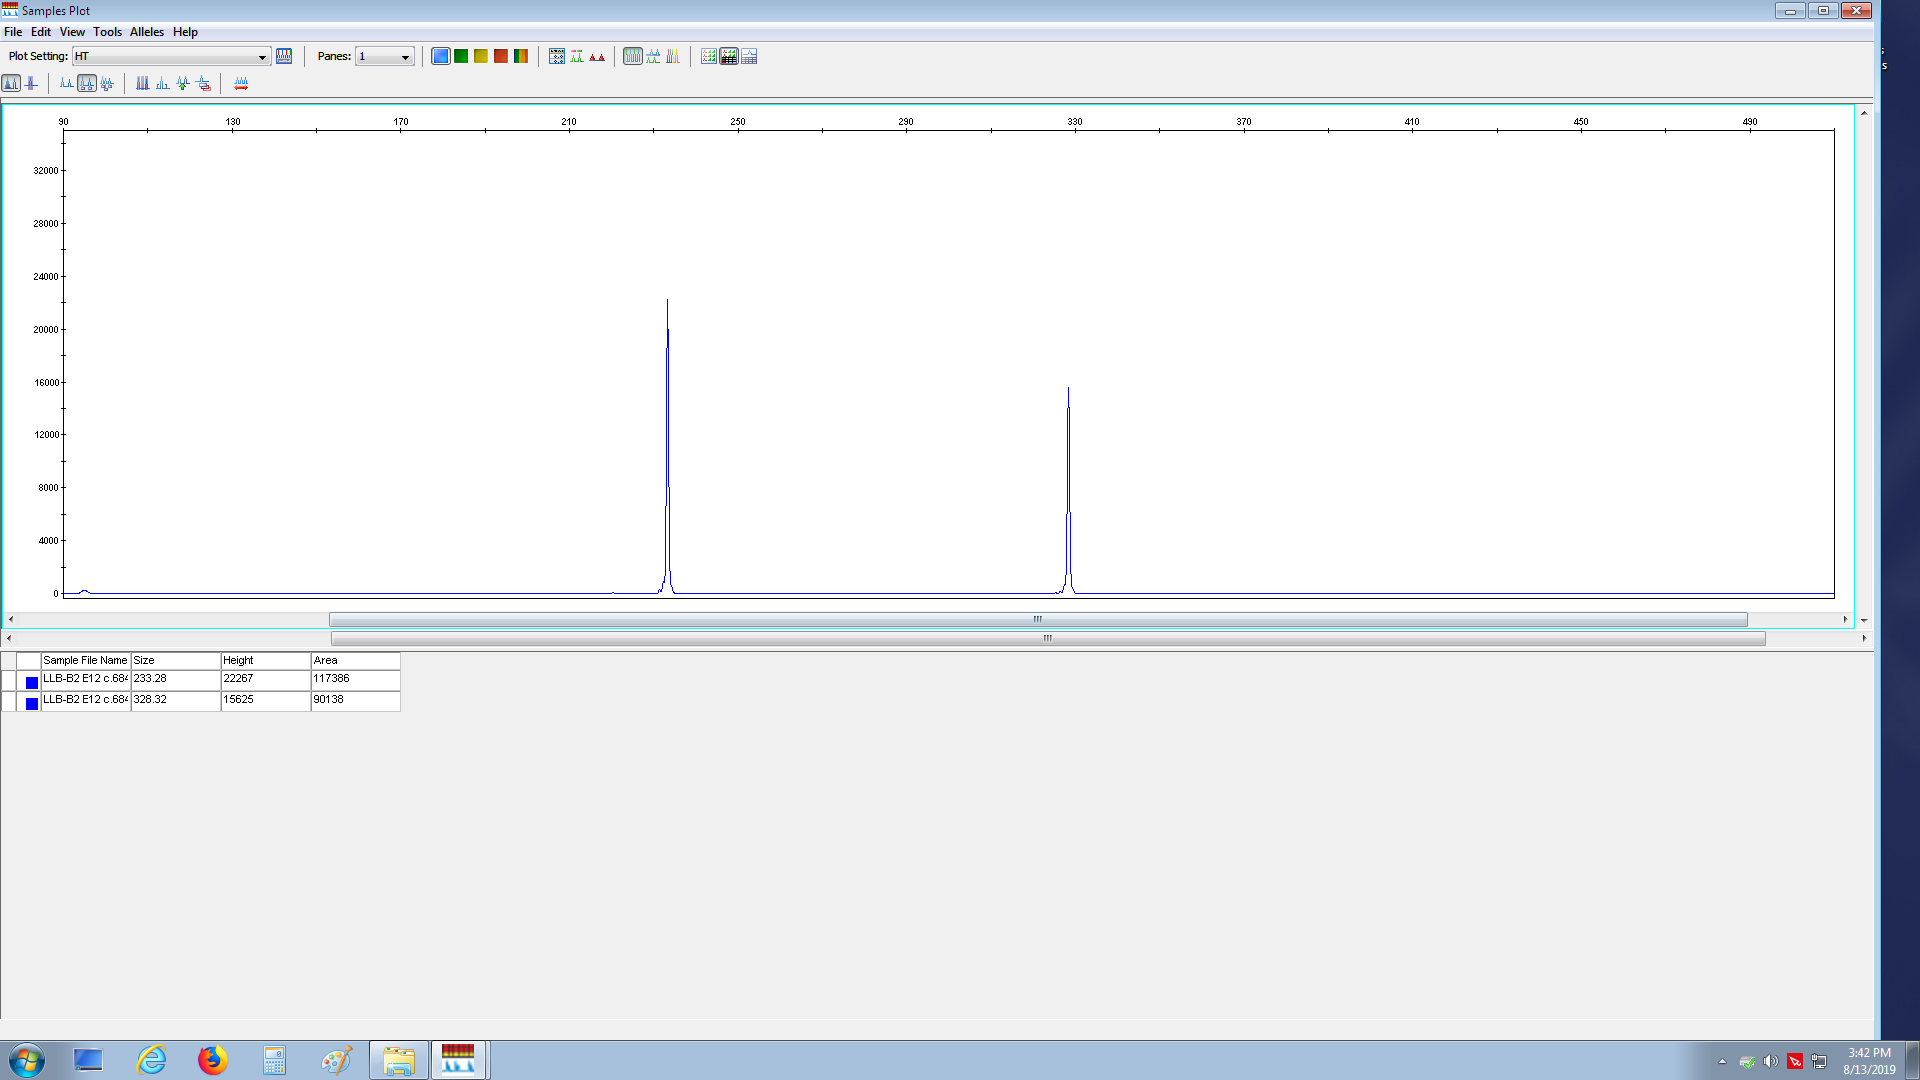


57%

43%

**c.6844G>T**

**Figure S6. Capillary electrophoresis analyses of *BRCA2* exon 12 splicing patterns in control and patient lymphoblastoid cell lines**

The *BRCA2* exon 12 splicing patterns were assessed by RT-PCR in LCLs of 3 healthy donors (controls, 1 to 3) and of patients carrying selected variants. For the two nonsense, c.6844G>T and c.6901G>T (bold), the missense c.6935A>T and c.6853A>G variants, the analyses were conducted in LCLs of one, two or three unrelated carriers, as indicated. In order to quantify the relative levels of the different isoforms, the fluorescent RT-PCR products were resolved by capillary electrophoresis on an automated genetic analyzer. For each LCL, one representative electropherogram is shown. The different fluorescence peaks correspond to transcripts either without (∆E12) or with (+E12) exon 12. Peak areas were used to quantify the relative levels of each transcript, expressed as percentage, and correspond to the average of at least three independent experiments (see Figure 3).


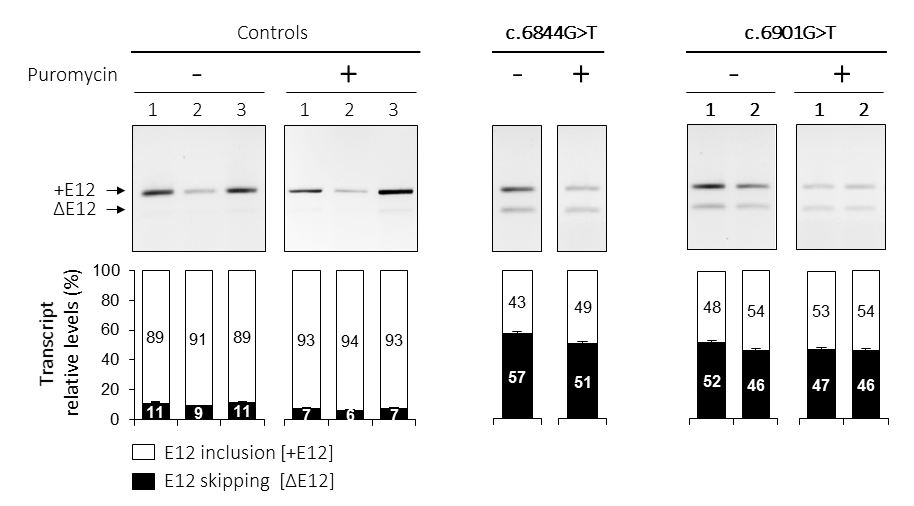


**Figure S7. RT-PCR analysis of *BRCA2* exon 12 splicing patterns in puromycin- or mock-treated lymphoblastoid cell lines of control individuals and patients carrying the c.6844G>T or c.6901G>T nonsense variants**

LCLs of three healthy donors (controls) and of a patient carrying the c.6844G>T nonsense variant as well as two unrelated patients carrying the c.6901G>T nonsense variant were cultured and treated (+) or mock-treated (-) with puromycin, as previously described (3). In these biological samples, the *BRCA2* exon 12 splicing patterns were assessed by RT-PCR, as described in Materials and Methods. The images show the agarose gel electrophoresis of the RT-PCR products. The identities of the two RT-PCR products, with (+E12) or without (∆E12) exon 12, are indicated on the left of the gel. For each LCL, the relative abundances of these two RNA isoforms were determined by capillary electrophoresis of the fluorescent RT-PCR products, as indicated in Materials and Methods. The data shown under the images are expressed as percentage of transcript levels relative to all RT-PCR products and represent the average of at least three independent experiments. Error bars indicate standard deviation values.


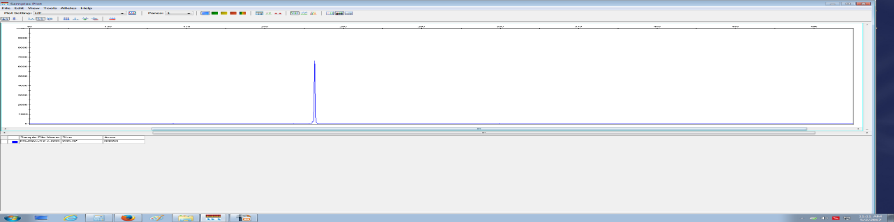

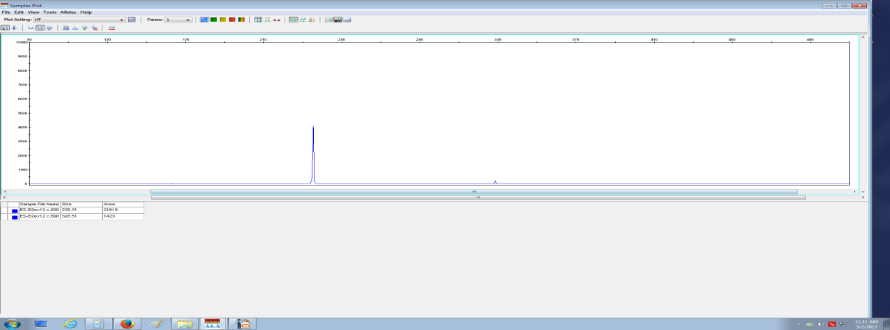

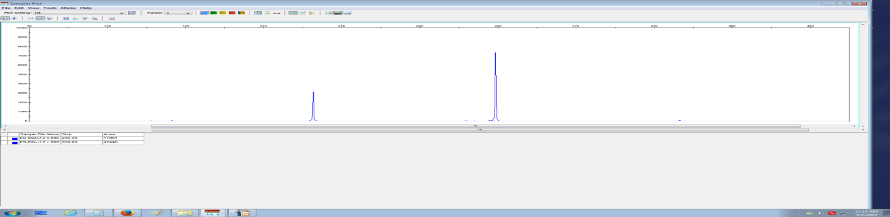

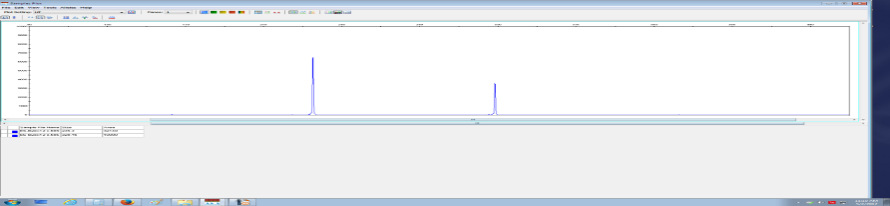

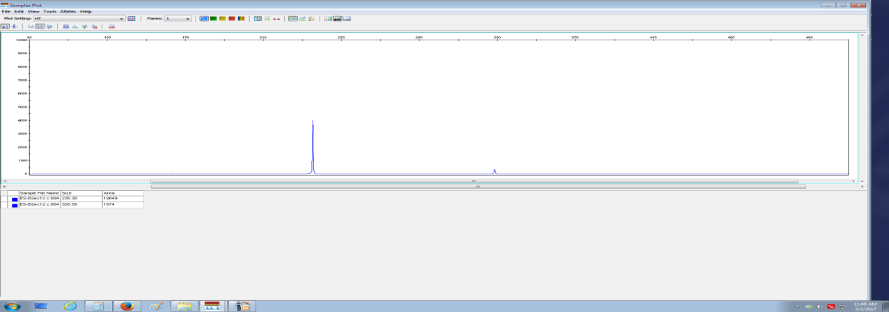

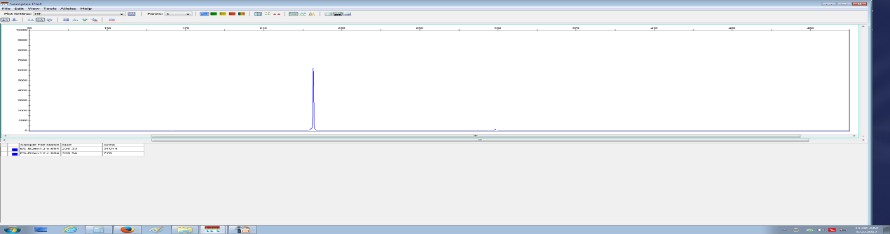

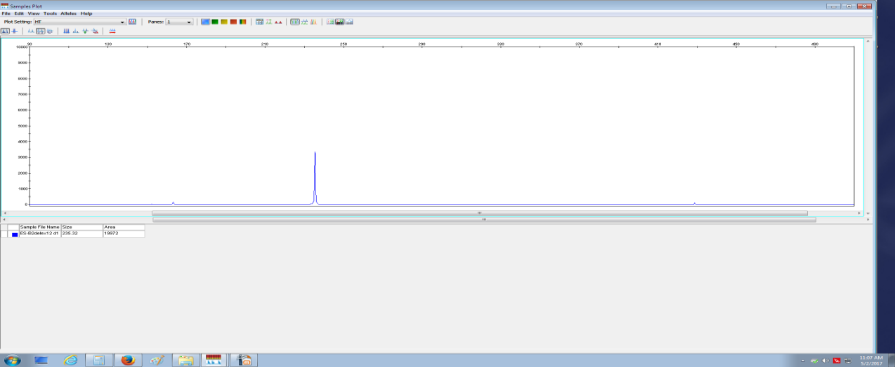

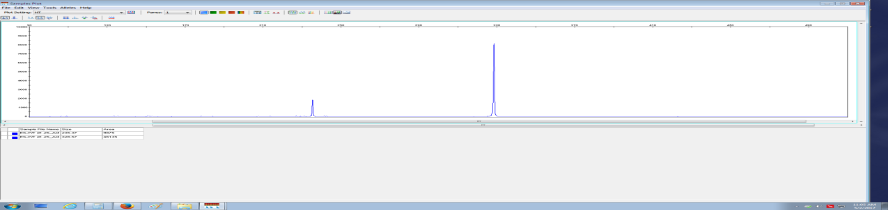


92%

71%

94%

**c.6844G>T**

64%

c.6853A>G

29%

**c.6859A>T**

**c.6901G>T**

100%

c.6937+1G>A

Fluorescence

Fragment size

ΔE12

+E12

82%

WT

2%

DelE12

98%

18%

100%

8%

36%

6%

c.6842G>T

**Nonsense**

**Figure S8. Capillary electrophoresis analyses of *BRCA2* exon 12 splicing patterns in variant-expressing mESC**

The exon 12 splicing patterns of WT and mutant h*BRCA2* BAC constructs expressed in mESC were assessed by fluorescent RT-PCR, as described in Materials and Methods. In order to quantify the relative levels of each isoform, the fluorescent RT-PCR products were resolved by capillary electrophoresis on an automated genetic analyzer. For each variant-expressing mESC, one representative electropherogram is shown. The different fluorescence peaks correspond to transcripts either without (∆E12) or with (+E12) exon 12. Peak areas were used to quantify the relative levels of each transcript, expressed as percentage and corresponding to the average of at least three independent experiments.

DelE12

c.6842G>T

**c.6844G>T**

c.6853A>G

**c.6859A>T**

**c.6901G>T**

c.6937+1G>A

WT


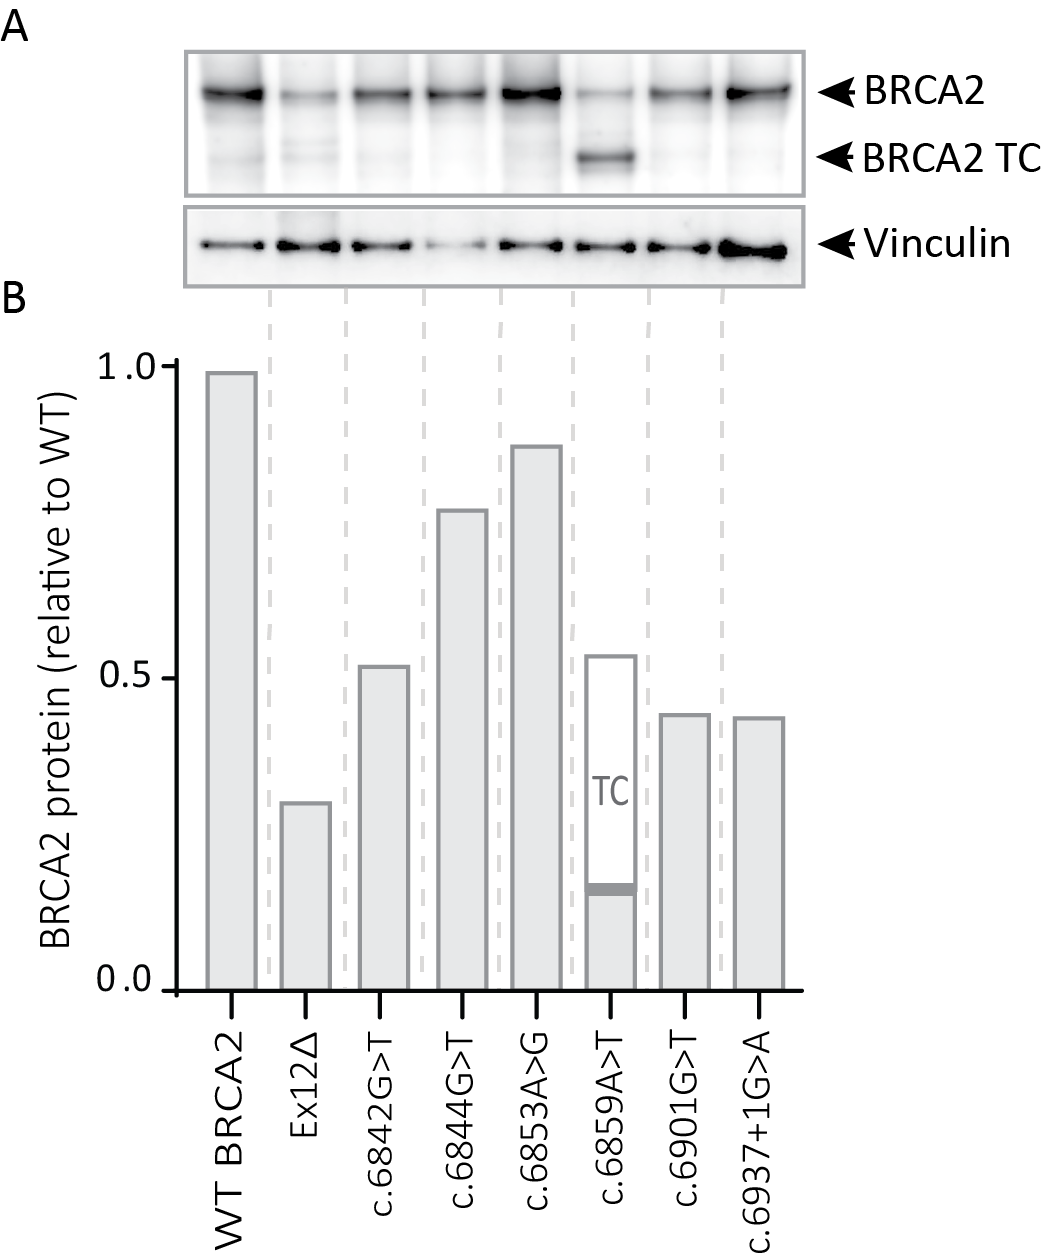


BRCA2 FL/ΔE12

BRCA2 TC


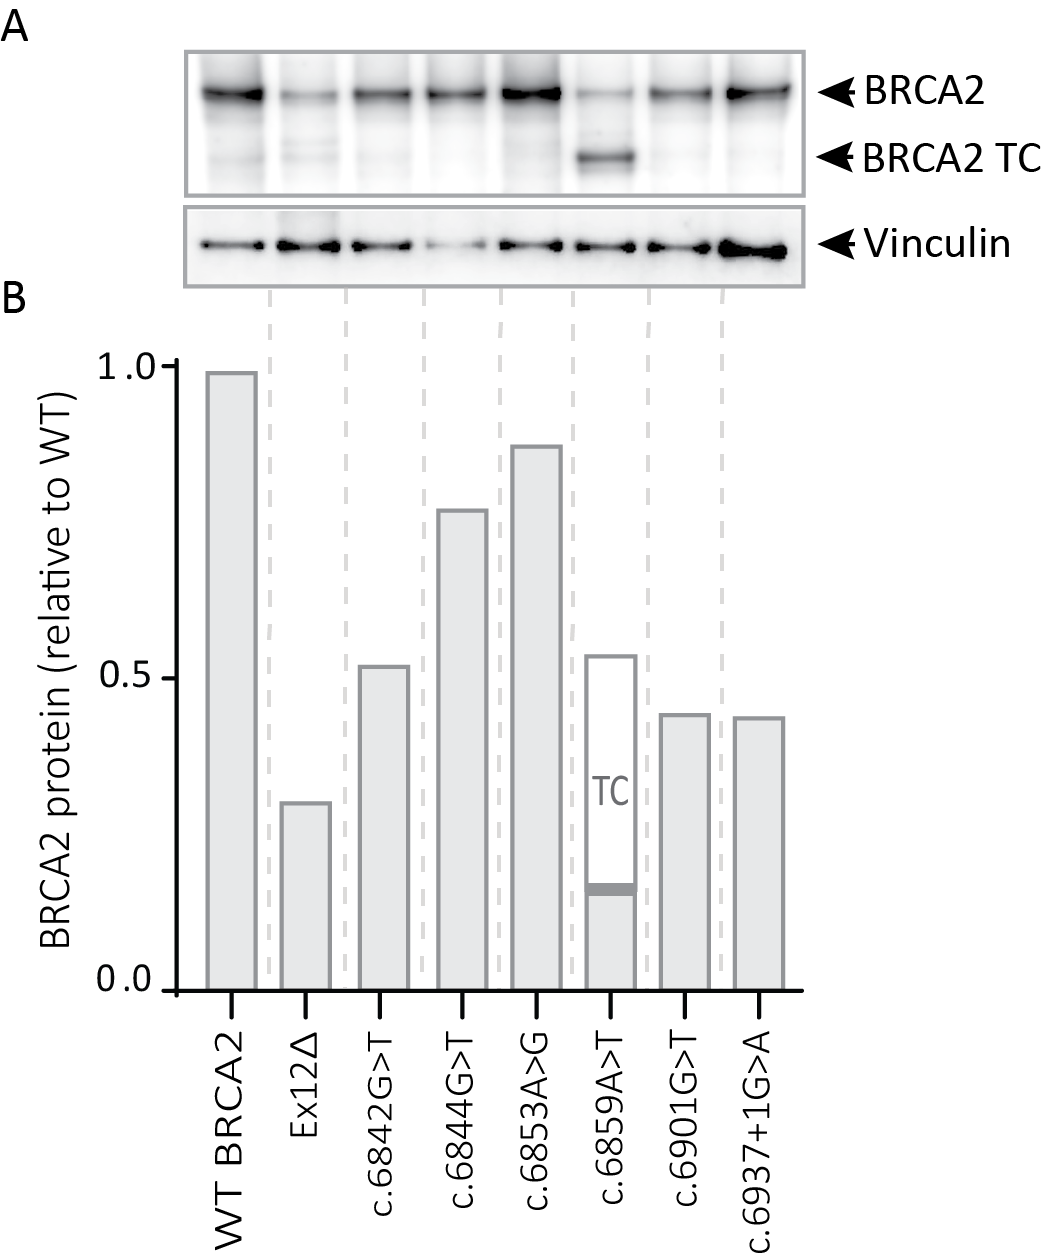


Vinculin

BRCA2 protein (relative to WT)

**Figure S9. Quantitation of BRCA2 protein expression in mESC**

Expression of BRCA2 full length (FL), without exon 12 (ΔE12) and truncated (TC) protein isoforms were detected by western blot analysis. Due to the small difference in size between the full length BRCA2 protein (BRCA2 FL protein isoform, 3418 aa) and the BRCA2 protein deleted for E12 (BRCA2 ΔE12 protein isoform, 3386 aa), these two protein isoforms are indistinguishable by western blot analysis. Vinculin was used as loading control.Chemiluminescent signals were captured by the Amersham Imager 600 (GE Healthcare Life Sciences) and band intensity quantification was performed on non-saturated images using ImageQuant TL software. The abundance of BRCA2 protein was normalized to the amount of vinculin in each lane (loading control). BRCA2 protein expression is presented relative to WT BRCA2 protein level.

**
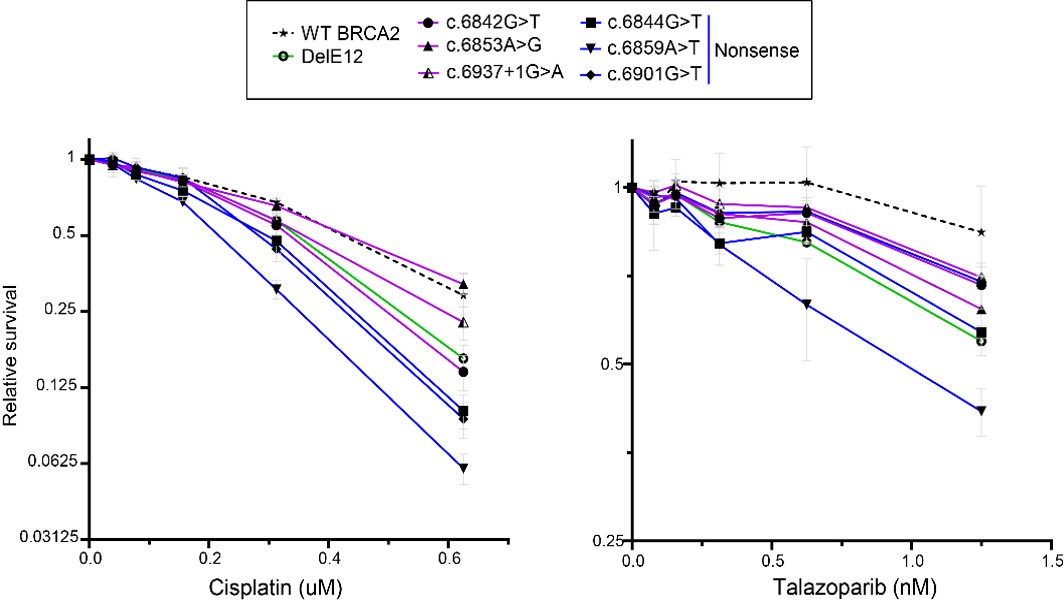
**

**Figure S10. Sensitivity of BRCA2 variants to cisplatin and PARP inhibitors**

Mouse ESC expressing *BRCA2* WT or variants were treated with cisplatin or PARP inhibitor (Talazoparib) and relative cell survival compared to untreated cells was determined as described in Materials and Methods. Data represent the average of four experiments per variant. Error bars indicate the standard error.

**Supplemental references**

1. Li L, Biswas K, Habib LA, Kuznetsov SG, Hamel N, Kirchhoff T, et al. Functional redundancy of exon 12 of *BRCA2* revealed by a comprehensive analysis of the c.6853A>G (p.I2285V) variant. Hum Mutat 2009;30:1543–50.
2. Yeo G, Burge CB. Maximum Entropy Modeling of Short Sequence Motifs with Applications to RNA Splicing Signals. J Comput Biol 2004;11:377–94.
3. Soukarieh O, Gaildrat P, Hamieh M, Drouet A, Baert-Desurmont S, Frébourg T, et al. Exonic Splicing Mutations Are More Prevalent than Currently Estimated and Can Be Predicted by Using In Silico Tools. Aretz S, editor. PLOS Genet 2016;12:e1005756.

**Supplemental Note**

**GGC Consortium**

French HBOC diagnostic laboratories within the Group “Genetic and Cancer” (GGC, Unicancer)

Françoise Bonnet, Natalie Jones, Virginie Bubien, Michel Longy, Nicolas Sevenet: Institut Bergonie - Bordeaux; Sophie Krieger, Laurent Castera, Dominique Vaur: Centre François Baclesse - Caen; Maud Privat, Nancy Uhrhammer, Yves Jean Bignon: Centre Jean Perrin - Clermont-Ferrand; Sarab Lizard, Vincent Goussot: CHU de Dijon, Hôpital d'Enfants, Service de Génétique Médicale - Dijon; Aurélie Dumont, Françoise Revillion: Centre Oscar Lambret - Lille; Mélanie Léone, Nadia Boutry-Kryza, Olga Sinilnikova (deceased): Hospices Civils de Lyon and Centre Léon Bérard - Lyon; Audrey Remenieras, Violaine Bourdon, Tetsuro Noguchi, Hagay Sobol: Institut Paoli Calmettes – Marseille; Pierre-Olivier Harmand, Paul Vilquin, Pascal Pujol: Laboratoire de Biologie Cellulaire et Hormonale (CHU Arnaud de Villeneuve) - Montpellier; Philippe Jonveaux, Myriam Bronner, Joanna Sokolowska, Sarab Lizard: CHU de Nancy-Brabois - Vandoeuvre-les-Nancy; Capucine Delnatte, Virginie Guibert, Céline Garrec, Stéphane Bezieau: CHU - Institut de Biologie - Hôtel Dieu - Nantes; Erell Guillerm, Florence Coulet: Groupe hospitalier Pitié-Salpétriere, Assistance Publique-Hôpitaux de Paris, Université Pierre et Marie Curie, Laboratoire d'Oncogénétique et Angiogénétique Moléculaire - Paris; Virginie Caux-Moncoutier, Lisa Golmard, Claude Houdayer, Dominique Stoppa-Lyonnet: Institut Curie - Paris; Fanny Barotel: Institut Jean Godinot - Reims; Danièle Muller: Centre Paul Strauss - Strasbourg; Christine Toulas: Institut Claudius Regaud - Toulouse; Etienne Rouleau, Marine Guillaud-Bataille, Brigitte Bressac-De Paillerets: Institut Gustave Roussy - Villejuif.

**COVAR Group (COsegregation of VARiants in the *BRCA1/2* and *PALB2* genes)**

(https://clinicaltrials.gov/ct2/show/NCT01689584)

| **Members** | **Center** | **City (France)** |
| --- | --- | --- |
| Florence Amram, Michèle Mathieu-Dramard | CHU Amiens | Amiens |
| Claire Le Hetet, Olivier Ingster | ICO - Centre Paul Papin  Service de Génétique Médicale | Angers |
| Paul Gesta | Centre Hospitalier d'Angoulême  Oncogénétique | Angoulême |
| Julie Mestre, Hélène Dreyfus | Institut Sainte-Catherine  Oncogénétique | Avignon |
| Céline Populaire, Marie-Agnès Collonge-Rame, Jean-Luc Bresson, | CHU Besançon ; Hôpital Saint-Jacques ; Service de Génétique Biologique | Besançon |
| Michel Longy; Emmanuelle Barouk-Simonet, Virginie Bubien ; Henri Margot, Françoise Bonnet, Virginie Bubien, Natalie Jones, Nicolas Sévenet | Institut Bergonié | Bordeaux |
| Julie Tinat | CHU- Groupe Hospitalier Pellegrin | Bordeaux |
| Isabelle Mortemousque | CH Jacques Coeur | Bourges |
| Séverine Audebert-Bellanger | CHU de Brest | Brest |
| Pascaline Berthet; Agnès Hardouin, Sophie Krieger, Laurent Castéra, Dominique Vaur | Centre François Baclesse | Caen |
| Sandra Fert-Ferrer | Centre Hospitalier  Hôtel Dieu  Laboratoire de Génétique | Chambery |
| Nancy Uhrhammer, Maud Privat, Mathilde Gay-Bellile, Yves-Jean Bignon, | Centre Jean Perrin - Département d'Oncogénétique | Clermont-Ferrand |
| Vincent Goussot , Salima El Chehadeh ; Laurence Faivre-Olivier | CHU de Dijon  Hôpital d'Enfants  Service de Génétique Médicale | Dijon |
| Odile Béra | CHU de Fort de France  Unité d'Oncogénétique | Fort de France, Martinique |
| Helene Dreyfus, Anne Béchet, Marie Bidard, Dominique Leroux | CHU de Grenoble | Grenoble |
| Hanitra Ranjatoelina | CHU Sud Réunion | La Réunion |
| Paul Gesta | Centre Hospitalier Saint-Louis  Oncogénétique | La Rochelle |
| Valérie LAYET | Hôpital Flaubert  Unité de Génétique | Le Havre |
| Claude Adenis, Françoise Revillion | Centre Oscar Lambret, Département de Cancérologie Générale | Lille |
| Sophie Lejeune, Sylvie Manouvrier-Hanu | CHRU LILLE  Hôpital Jeanne de Flandre  Service de Génétique Clinique | Lille |
| Laurence Vénat-Bouvet | CHU Dupuytren  Oncogénétique | Limoges |
| Valérie Bonadona; Sylvie Mazoyer ; Olga Sininilkova, Mélanie Léone, Adrien Buisson, Nadia Boutry-Kryza, Christine Lasset | Centre Léon Bérard Lyon | Lyon |
| Sophie Giraud | Hospices civils de Lyon | Lyon |
| Hagay Sobol, Tetsuro Noguchi, Violaine Bourdon, Audrey Remenieras, François Eisinger, Catherine Noguès | Institut Paoli-Calmettes  Département d'Oncologie Génétique | Marseille |
| Hélène Zattara | CHU La Timone, Département de Génétique | Marseille |
| Viorica Ciorna Monterrato, Julie Arel | CHR Metz | Metz |
| Jean-Marc Rey, Pierre-Olivier Harmand, Paul Vilquin, Virginie Galibert, Isabelle Coupier | CHU Arnaud de Villeneuve - Service de Génétique | Montpellier |
| Elisabeth Luporsi | Centre Alexis Vautrin; Oncogénétique | Nancy |
| Myriam Bronner, Joanna Sokolowska-Gillois, Christophe Philippe, Sarab Lizard, Philippe Jonveaux | CHU Nancy ; Hôpital Brabois ; Service de Génétique | Nancy |
| Capucine Delnatte, Virginie Guibert, Stéphane Bézieau, Estelle Cauchin, Caroline Abadie | ICO - Centre René Gauducheau  Unité d'Oncogénétique | Nantes |
| Alain Lortholary, Alica Yvard | Centre Catherine de Sienne  Oncogénétique | Nantes |
| Véronique Mari; Marc Frenay | Centre Antoine Lacassagne - Nice | Nice |
| Jean Chiesa, Audrey Combes | CHRU Caremeau, Oncogénétique | Nimes |
| Paul Gesta, Jeanne Triquard | Centre Hospitalier de Niort  Oncogénétique | Niort |
| Isabelle Mortemousque | Hôpital de la Source  Génétique | Orléans |
| Virginie Caux-Moncoutier, Lisa Golmard, Claude Houdayer, Muriel Belotti, Antoine Depauw, Caroline Lecerf, Marine Lementec, Anais Dupre, Bruno Buecher, Marion Gauthier-Villars, Sandrine Caputo, Dominique Stoppa-Lyonnet | Institut Curie site Paris  Génétique Oncologique | Paris |
| Florence Coulet, Mathilde Warcoin, Erell Guillerm, Noemie Basset, Florent Soubrier | Groupe Hospitalier Pitié-Salpêtrière - Laboratoire d'Oncogénétique et d'Angiogénétique | Paris |
| Anne Fajac, Florent Soubrier | Hôpital Tenon  Oncogénétique Clinique | Paris |
| Diane Molière, Pierre-Laurent Puig | HEGP | Paris |
| Marilyn Lackmy-Port-Lis | CHU de Pointe à Pitre | Pointe à Pitre, Guadeloupe |
| Paul Gesta, Brigitte Gilbert-Dussardier | CHU La Milétrie  Oncogénétique | Poitiers |
| Nathalie Heil, Frédérique Carré-Pigeon | Polyclinique de Courlancy | Reims |
| Tan Dat Nguyen; Fanny Barotel, David Bonnerave; Aude-Marie Savoye | Institut Jean Godinot ; Service de Génétique et Biologie de la Reproduction | Reims |
| Dominique Gaillard ; Céline Poirsier ; Mozelle-Nivoix Monique | CHU de Reims ; Service de Génétique | Reims |
| Vanessa Colombert, Enora Lejeune, Caroline Abadie | Centre Eugène Marquis | Rennes |
| Annick Rossi, Isabelle Thevenet, Thierry Frebourg | CHU de Rouen  Unité de Génétique Clinique | Rouen |
| Marine Lebrun, Fabienne Prieur | CHU Saint-Etienne Hôpital Nord | Saint-Etienne |
| Emmanuelle Fourme, Claire Saule, Ophélie Bertrand, Chrystelle Colas | Institut Curie  site Hôpital René Huguenin  Epidémiologie Clinique | Saint-Cloud |
| Jean-Pierre Fricker; Laurène Rebattu, Danièle Muller, Joseph Abecassis, Hélène Nehme-Schuster | Centre Paul Strauss ; Laboratoire de Biologie Tumorale | Strasbourg |
| Christine Maugard | Hopital Universitaire de Strasbourg | Strasbourg |
| Viviane Feillel; Norbert Lignon, Christine Toulas, Laurence Gladieff | Institut Claudius Regaud  Laboratoire d’Oncogénétique | Toulouse |
| Isabelle Mortemousque | CHU Bretonneau ; Service de Génétique ; Génétique | Tours |
| Monique Mozelle | CHG Troyes | Troyes |
| Marie-Noelle Bonnet-Dupeyron | Centre Hospitalier de Valence | Valence |
| Marine Guillaud-Bataille, Marine DImaria, Sophie Villebasse, Odile Cabaret, Alice Fievet, Etienne Rouleau, Brigitte Bressac-De Paillerets, Olivier Caron | Institut Gustave Roussy | Villejuif |
